# Supplementary material for: The Complete Spectrum of Yeast Chromosome Instability Genes Identifies Candidate CIN Cancer Genes and Functional Roles for ASTRA Complex Components
Source: PLoS Genet. 2011 Apr 28;7(4):e1002057. doi: 10.1371/journal.pgen.1002057 (PMC3084213; doi:10.1371/journal.pgen.1002057)
Supplement: Table S1 — Yeast CIN gene master list including this study and literature. (XLS) [file pgen.1002057.s003.xls]

## Sheet: Sheet1
Table S1. Yeast CIN gene master list including this study and the literature
(Includes all data generated in this study and compiled from the literature)
* Validated GCR mutators are indicated (Supporting Methods). Fold induction and GCR rate are shown beside the phenotype (i.e. GCR* (frequency, rate)) for the genes TPI1, MED6, IPI1, ATM1, ACC1, PRI1, PRI2, IPL1, SLD2 and YMR185W)
Category (Complexes)	ORF ID	Gene	CIN Phenotype	Allele(s)	Essentiality	Meta score	Source of data	Description
Proteolysis
Proteasome	YGL011C	SCL1	CTF	scl1-ts	Essential	Strong (single hit)	[3]	Alpha 1 subunit of the 20S proteasome involved in the degradation of ubiquitinated substrates; 20S proteasome is the core complex of the 26S proteasome; essential for growth; detected in the mitochondria
Proteasome	YOL038W	PRE6	CTF	pre6-ts	Essential	Strong (single hit)	[3]	Alpha 4 subunit of the 20S proteasome; may replace alpha 3 subunit (Pre9p) under stress conditions to create a more active proteasomal isoform; GFP-fusion protein relocates from cytosol to the mitochondrial surface upon oxidative stress
Proteasome	YGR253C	PUP2	CTF	pup2-ts	Essential	Strong (single hit)	[3]	Alpha 5 subunit of the 20S proteasome involved in ubiquitin-dependent catabolism; human homolog is subunit zeta
Proteasome	YMR314W	PRE5	CTF	pre5-ts	Essential	Weak (single hit)	[3]	Alpha 6 subunit of the 20S proteasome
Proteasome	YOR362C	PRE10	CTF	pre10-ts	Essential	Strong (single hit)	This Study	Alpha 7 subunit of the 20S proteasome
Proteasome	YJL001W	PRE3	GCR	pre3-2	Essential	Not Determined	This Study	Beta 1 subunit of the 20S proteasome, responsible for cleavage after acidic residues in peptides
Proteasome	YER094C	PUP3	CTF (overexpression)	N/A	Essential	Not Determined	[9]	Beta 3 subunit of the 20S proteasome involved in ubiquitin-dependent catabolism; human homolog is subunit C10
Proteasome	YER012W	PRE1	CTF, CTF(overexpression, ALF	pre1-ts	Essential	Weak (multiple hit)	[9] and this study	Beta 4 subunit of the 20S proteasome; localizes to the nucleus throughout the cell cycle
Proteasome	YPR103W	PRE2	Chromosome loss	N/A	Essential	Not Determined	[10]	Beta 5 subunit of the 20S proteasome, responsible for the chymotryptic activity of the proteasome
Proteasome	YFR050C	PRE4	CTF	pre4-ts	Essential	Weak (single hit)	[3]	Beta 7 subunit of the 20S proteasome
Proteasome	YDR363W-A	SEM1	ALF	N/A	Non-essential	Weak (single hit)	[6]	Component of the lid subcomplex of the regulatory subunit of the 26S proteasome; involved in mRNA export mediated by the TREX-2 complex (Sac3p-Thp1p); ortholog of human DSS1
Proteasome	YHR052W	CIC1	CTF	cic1-2	Essential	Weak (single hit)	This Study	Essential protein that interacts with proteasome components and has a potential role in proteasome substrate specificity; also copurifies with 66S pre-ribosomal particles
Proteasome	YDL097C	RPN6	CTF, GCR	rpn6-1	Essential	Strong (multiple hit)	This Study	Essential, non-ATPase regulatory subunit of the 26S proteasome lid required for the assembly and activity of the 26S proteasome; the human homolog (S9 protein) partially rescues Rpn6p depletion
Proteasome	YDL147W	RPN5	CTF	rpn5-1	Essential	Strong (multiple hit)	This Study	Essential, non-ATPase regulatory subunit of the 26S proteasome lid, similar to mammalian p55 subunit and to another S. cerevisiae regulatory subunit, Rpn7p
Proteasome	YFR004W	RPN11	CTF	rpn11-8	Essential	Weak (single hit)	This Study	Metalloprotease subunit of the 19S regulatory particle of the 26S proteasome lid; couples the deubiquitination and degradation of proteasome substrates; involved, independent of catalytic activity, in fission of mitochondria and peroxisomes
Proteasome	YHR027C	RPN1	CTF	rpn1-821	Essential	Strong (single hit)	This Study	Non-ATPase base subunit of the 19S regulatory particle of the 26S proteasome; may participate in the recognition of several ligands of the proteasome; contains a leucine-rich repeat (LRR) domain, a site for protein-protein interactions
Proteasome	YFR052W	RPN12	GCR	DAmP	Essential	Strong (single hit)	This Study	Subunit of the 19S regulatory particle of the 26S proteasome lid; synthetically lethal with RPT1, which is an ATPase component of the 19S regulatory particle; physically interacts with Nob1p and Rpn3p
Proteasome	YGR184C	UBR1	CTFx2, BiM	N/A	Non-essential	Strong (multiple hit)	[6,11]	Ubiquitin-protein ligase (E3) that interacts with Rad6p/Ubc2p to ubiquitinate substrates of the N-end rule pathway; binds to the Rpn2p, Rpt1p, and Rpt6p proteins of the 19S particle of the 26S proteasome
	YFL009W	CDC4	CTF x2	cdc4-2, cdc4-3	Essential	Strong (multiple hit)	This Study	F-box protein required for G1/S and G2/M transition, associates with Skp1p and Cdc53p to form a complex, SCFCdc4, which acts as ubiquitin-protein ligase directing ubiquitination of the phosphorylated CDK inhibitor Sic1p
	YML088W	UFO1	GCR	N/A	Non-essential	Strong (single hit)	[5]	F-box receptor protein, subunit of the Skp1-Cdc53-F-box receptor (SCF) E3 ubiquitin ligase complex; binds to phosphorylated Ho endonuclease, allowing its ubiquitylation by SCF and subsequent degradation
	YDL126C	CDC48	CTF x2	cdc48-2, cdc48-9	Essential	Weak (multiple hit)	This Study	ATPase in ER, nuclear membrane and cytosol with homology to mammalian p97; in a complex with Npl4p and Ufd1p participates in retrotranslocation of ubiquitinated proteins from the ER into the cytosol for degradation by the proteasome
Kinetochore, Spindle and Cell Cycle
Ndc80 complex	YIL144W	NDC80	CTF	tid3-1	Essential	Weak (single hit)	This Study	Component of the evolutionarily conserved kinetochore-associated Ndc80 complex (Ndc80p-Nuf2p-Spc24p-Spc25p); conserved coiled-coil protein involved in chromosome segregation, spindle checkpoint activity, kinetochore assembly and clustering
Ndc80 complex	YMR117C	SPC24	CTF	spc24 10-1	Essential	Strong (single hit)	This Study	Component of the evolutionarily conserved kinetochore-associated Ndc80 complex (Ndc80p-Nuf2p-Spc24p-Spc25p); involved in chromosome segregation, spindle checkpoint activity and kinetochore clustering
Ndc80 complex	YOL069W	NUF2	CTF	nuf2-61	Essential	Strong (single hit)	This Study	Component of the evolutionarily conserved kinetochore-associated Ndc80 complex (Ndc80p-Nuf2p-Spc24p-Spc25p); involved in chromosome segregation, spindle checkpoint activity and kinetochore clustering
Ndc80 complex	YER018C	SPC25	CTF	spc25-1	Essential	Strong (single hit)	This Study	Component of the evolutionarily conserved kinetochore-associated Ndc80 complex (Ndc80p-Nuf2p-Spc24p-Spc25p); involved in chromosome segregation, spindle checkpoint activity and kinetochore clustering
MIND complex	YAL034W-A	MTW1	CTF	mtw1-ts	Essential	Strong (single hit)	This Study	Essential component of the MIND kinetochore complex (Mtw1p Including Nnf1p-Nsl1p-Dsn1p) which joins kinetochore subunits contacting DNA to those contacting microtubules; critical to kinetochore assembly
MIND complex	YIR010W	DSN1	CTF x2, ALF	dsn1-7, dsn1-8	Essential	Strong (multiple hit)	This Study	Essential component of the MIND kinetochore complex (Mtw1p Including Nnf1p-Nsl1p-Dsn1p) which joins kinetochore subunits contacting DNA to those contacting microtubules; important for chromosome segregation
MIND complex	YJR112W	NNF1	CTF x2	nnf1-17, nnf1-77	Essential	Strong (multiple hit)	This Study	Essential component of the MIND kinetochore complex (Mtw1p Including Nnf1p-Nsl1p-Dsn1p) which joins kinetochore subunits contacting DNA to those contacting microtubules; required for accurate chromosome segregation
MIND complex	YPL233W	NSL1	CTF x2, GCR	nsl1-5, nsl1-6	Essential	Strong (multiple hit)	This Study	Essential component of the MIND kinetochore complex (Mtw1p Including Nnf1p-Nsl1p-Dsn1p) which joins kinetochore subunits contacting DNA to those contacting microtubules; required for accurate chromosome segregation
Chromosomal Passenger Complex	YPL209C	IPL1	CTF, GCR* (5, 1.76E-09)	ipl1-2, DAmP	Essential	Strong (multiple hit)	This Study	Aurora kinase subunit of the conserved chromosomal passenger complex (CPC; Ipl1p-Sli15p-Bir1p-Nbl1p), involved in regulating kinetochore-microtubule attachments; helps maintain condensed chromosomes during anaphase and early telophase
Chromosomal Passenger Complex	YHR199C-A	NBL1	Chromosome Missegregation	N/A	Essential	Not Determined	[12]	Subunit of the conserved chromosomal passenger complex (CPC; Ipl1p-Sli15p-Bir1p-Nbl1p), which regulates mitotic chromosome segregation; not required for the kinase activity of the complex; mediates the interaction of Sli15p and Bir1p
Chromosomal Passenger Complex	YBR156C	SLI15	ALF, BiM, CTF	N/A	Non-essential	Strong (multiple hit)	[6,8], and this study	Subunit of the conserved chromosomal passenger complex (CPC; Ipl1p-Sli15p-Bir1p-Nbl1p), which regulates kinetochore-microtubule attachments, activation of the spindle tension checkpoint, and mitotic spindle disassembly
Outer Kinetochore	YDR254W	CHL4	CTFx2, BiMx2, ALF, LOH	N/A	Non-essential	Strong (multiple hit)	[2,6,8,11]	Outer kinetochore protein required for chromosome stability, interacts with kinetochore proteins Ctf19p, Ctf3p, and Iml3p; exhibits a two-hybrid interaction with Mif2p; association with CEN DNA requires Ctf19p
Outer Kinetochore	YLR381W	CTF3	CTFx2, BiMx2	N/A	Non-essential	Strong (multiple hit)	[6,8,11]	Outer kinetochore protein that forms a complex with Mcm16p and Mcm22p; may bind the kinetochore to spindle microtubules
Outer Kinetochore	YGR179C	OKP1	CTF	okp1-5	Essential	Strong (single hit)	This Study	Outer kinetochore protein, required for accurate mitotic chromosome segregation; component of the kinetochore sub-complex COMA (Ctf19p, Okp1p, Mcm21p, Ame1p) that functions as a platform for kinetochore assembly
Outer Kinetochore	YPL018W	CTF19	CTFx2,ALF, LOH, BiM	N/A	Non-essential	Strong (multiple hit)	[2,6,8,11]	Outer kinetochore protein, required for accurate mitotic chromosome segregation; component of the kinetochore sub-complex COMA (Ctf19p, Okp1p, Mcm21p, Ame1p) that functions as a platform for kinetochore assembly
Dam1 complex	YDR201W	SPC19	CTF	spc19-ts	Essential	Weak (single hit)	[3]	Essential subunit of the Dam1 complex (aka DASH complex), couples kinetochores to the force produced by MT depolymerization thereby aiding in chromosome segregation; also localized to nuclear side of spindle pole body
Dam1 complex	YKR037C	SPC34	CTF, GCR	DAmP	Essential	Weak (multiple hit)	This Study	Essential subunit of the Dam1 complex (aka DASH complex), couples kinetochores to the force produced by MT depolymerization thereby aiding in chromosome segregation; also localized to nuclear side of spindle pole body
Dam1 complex	YGR113W	DAM1	CTF x2, GCR	dam1-1, dam1-5	Essential	Strong (multiple hit)	This Study	Essential subunit of the Dam1 complex (aka DASH complex), couples kinetochores to the force produced by MT depolymerization thereby aiding in chromosome segregation; Ipl1p target for regulating kinetochore-MT attachments
Dam1 complex	YGL061C	DUO1	CTF	duo1-2	Essential	Weak (single hit)	This Study	Essential subunit of the Dam1 complex (aka DASH complex), couples kinetochores to the force produced by MT depolymerization thereby aiding in chromosome segregation; is transferred to the kinetochore prior to mitosis
Dam1 complex	YKL052C	ASK1	CTF, GCR	ask1-2	Essential	Weak (multiple hit)	This Study	Essential subunit of the Dam1 complex (aka DASH complex), couples kinetochores to the force produced by MT depolymerization thereby aiding in chromosome segregation; phosphorylated during the cell cycle by cyclin-dependent kinases
Kinetochore	YOR026W	BUB3	CTFx2, BiM, ALF	N/A	Non-essential	Strong (multiple hit)	[6,11]	Kinetochore checkpoint WD40 repeat protein that localizes to kinetochores during prophase and metaphase, delays anaphase in the presence of unattached kinetochores; forms complexes with Mad1p-Bub1p and with Cdc20p, binds Mad2p and Mad3p
Kinetochore	YFR046C	CNN1	CTFx2	N/A	Non-essential	Strong (multiple hit)	[6,11]	Kinetochore protein of unknown function; associated with the essential kinetochore proteins Nnf1p and Spc24p; phosphorylated by both Clb5-Cdk1 and, to a lesser extent, Clb2-Cdk1.
Kinetochore	YKL089W	MIF2	CTF	mif2-3	Essential	Strong (multiple hit)	This Study	Kinetochore protein with homology to human CENP-C, required for structural integrity of the spindle during anaphase spindle elongation, interacts with histones H2A, H2B, and H4, phosphorylated by Ipl1p
Kinetochore	YBR211C	AME1	CTF	ame1-4	Essential	Strong (single hit)	This Study	Essential kinetochore protein associated with microtubules and spindle pole bodies; component of the kinetochore sub-complex COMA (Ctf19p, Okp1p, Mcm21p, Ame1p); involved in spindle checkpoint maintenance
Kinetochore	YMR168C	CEP3	CTF x2	cep3-1, cep3-2	Essential	Strong (multiple hit)	This Study	Essential kinetochore protein, component of the CBF3 complex that binds the CDEIII region of the centromere; contains an N-terminal Zn2Cys6 type zinc finger domain, a C-terminal acidic domain, and a putative coiled coil dimerization domain
Kinetochore	YMR094W	CTF13	CTF	ctf13-30	Essential	Not Determined	[7] and this study	Subunit of the CBF3 complex, which binds to the CDE III element of centromeres, bending the DNA upon binding, and may be involved in sister chromatid cohesion during mitosis
Kinetochore	YGR140W	CBF2	CTF x3, GCR	cbf2-1, cbf2-2, cbf2-42	Essential	Strong (multiple hit)	This Study	Essential kinetochore protein, component of the CBF3 multisubunit complex that binds to the CDEIII region of the centromere; Cbf2p also binds to the CDEII region possibly forming a different multimeric complex, ubiquitinated in vivo
Kinetochore	YOR195W	SLK19	BiM	N/A	Non-essential	Not Determined	[8]	Kinetochore-associated protein required for normal segregation of chromosomes in meiosis and mitosis; component of the FEAR regulatory network, which promotes Cdc14p release from the nucleolus during anaphase; potential Cdc28p substrate
Kinetochore	YGL060W	YBP2	BiM	N/A	Non-essential	Strong (single hit)	[6]	Central kinetochore associated protein that mediates mitotic progression; interacts with several central kinetochore proteins and the centromeric histone Cse4p; role in resistance to oxidative stress; similarity to Ybp1p and Slk19p
Kinetochore	YKL049C	CSE4	CTF	cse4-1	Essential	Weak (single hit)	This Study	Centromere protein that resembles histone H3, required for proper kinetochore function; homolog of human CENP-A
Kinetochore	YOR057W	SGT1	CTF x2	sgt1-3, sgt1-5	Essential	Strong (multiple hit)	This Study	Cochaperone protein; regulates activity of adenylyl cyclase Cyr1p; involved in kinetochore complex assembly; associates with the SCF (Skp1p/Cdc53p/F box protein) ubiquitin ligase complex; acts as a linker between Skp1p and HSP90 complexes
Kinetochore	YPR046W	MCM16	CTFx2, BiMx2, ALF	N/A	Non-essential	Strong (multiple hit)	[6,8,11]	Protein involved in kinetochore-microtubule mediated chromosome segregation; binds to centromere DNA
Kinetochore	YDR318W	MCM21	CTFx2, BiMx2, ALF, LOH	N/A	Non-essential	Strong (multiple hit)	[2,6,8,11]	Protein involved in minichromosome maintenance; component of the COMA complex (Ctf19p, Okp1p, Mcm21p, Ame1p) that bridges kinetochore subunits that are in contact with centromeric DNA and the subunits bound to microtubules
Kinetochore	YJR135C	MCM22	CTF, BiMx2, ALF	N/A	Non-essential	Strong (multiple hit)	[6,8]	Protein involved in minichromosome maintenance; component of the kinetochore; binds to centromeric DNA in a Ctf19p-dependent manner
Kinetochore	YDL139C	SCM3	CTF, Unequal DNA distribution	DAmP	Essential	Weak (multiple hit)	[13] and this study	Nonhistone component of centromeric chromatin that binds stoichiometrically to CenH3-H4 histones, required for kinetochore assembly; contains nuclear export signal (NES); required for G2/M progression and localization of Cse4p
Kinetochore	YBR107C	IML3	CTF, BiMx2, ALF	N/A	Non-essential	Strong (multiple hit)	[6,8]	Protein with a role in kinetochore function, localizes to the outer kinetochore in a Ctf19p-dependent manner, interacts with Chl4p and Ctf19p
Kinetochore	YDR328C	SKP1	CTF	N/A	Essential	Strong (single hit)	[14]	Evolutionarily conserved kinetochore protein that is part of multiple protein complexes, including the SCF ubiquitin ligase complex, the CBF3 complex that binds centromeric DNA, and the RAVE complex that regulates assembly of the V-ATPase
Kinetochore	YCL029C	BIK1	BiM	N/A	Non-essential	Not Determined	[8]	Microtubule-associated protein, component of the interface between microtubules and kinetochore, involved in sister chromatid separation; essential in polyploid cells but not in haploid or diploid cells; ortholog of mammalian CLIP-170
Anaphase promoting complex	YHR166C	CDC23	CTF	cdc23-4	Essential	Weak (single hit)	This Study	Subunit of the Anaphase-Promoting Complex/Cyclosome (APC/C), which is a ubiquitin-protein ligase required for degradation of anaphase inhibitors, including mitotic cyclins, during the metaphase/anaphase transition
Anaphase promoting complex	YDR118W	APC4	CTF	apc4-ts	Essential	Strong (single hit)	[3]	Subunit of the Anaphase-Promoting Complex/Cyclosome (APC/C), which is a ubiquitin-protein ligase required for degradation of anaphase inhibitors, including mitotic cyclins, during the metaphase/anaphase transition
Anaphase promoting complex	YGL240W	DOC1	CTF,ALF	N/A	Non-essential	Strong (multiple hit)	[5]	Processivity factor required for the ubiquitination activity of the anaphase promoting complex (APC), mediates the activity of the APC by contributing to substrate recognition; involved in cyclin proteolysis
Anaphase promoting complex	YGL116W	CDC20	CTF x2	cdc20-2, cdc20-3	Essential	Weak (multiple hit)	This Study	Cell-cycle regulated activator of anaphase-promoting complex/cyclosome (APC/C), which is required for metaphase/anaphase transition; directs ubiquitination of mitotic cyclins, Pds1p, and other anaphase inhibitors; potential Cdc28p substrate
Anaphase promoting complex	YGL003C	CDH1	CTFx2, BiMx2, LOH	N/A	Non-essential	Strong (multiple hit)	[2,6,8,11]	Cell-cycle regulated activator of the anaphase-promoting complex/cyclosome (APC/C), which directs ubiquitination of cyclins resulting in mitotic exit; targets the APC/C to specific substrates including Cdc20p, Ase1p, Cin8p and Fin1p
Anaphase promoting complex	YDL008W	APC11	CTF	apc11-13	Essential	Weak (single hit)	This Study	Catalytic core subunit of the Anaphase-Promoting Complex/Cyclosome (APC/C), which is a ubiquitin-protein ligase required for degradation of anaphase inhibitors, including mitotic cyclins, during the metaphase/anaphase transition
Spindle checkpoint	YGL086W	MAD1	CTFx2, BiM	N/A	Non-essential	Strong (multiple hit)	[6,11]	Coiled-coil protein involved in the spindle-assembly checkpoint; phosphorylated by Mps1p upon checkpoint activation which leads to inhibition of the activity of the anaphase promoting complex; forms a complex with Mad2p
Spindle checkpoint	YJL030W	MAD2	CTF, BiM	N/A	Non-essential	Strong (multiple hit)	[6]	Component of the spindle-assembly checkpoint complex, which delays the onset of anaphase in cells with defects in mitotic spindle assembly; forms a complex with Mad1p
Spindle checkpoint	YGR188C	BUB1	CTF,ALF	N/A	Non-essential	Strong (multiple hit)	[6]	Protein kinase that forms a complex with Mad1p and Bub3p that is crucial in the checkpoint mechanism required to prevent cell cycle progression into anaphase in the presence of spindle damage, associates with centromere DNA via Skp1p
Spindle checkpoint	YOR073W	SGO1	BiM, ALF	N/A	Non-essential	Strong (multiple hit)	[6]	Component of the spindle checkpoint, involved in sensing lack of tension on mitotic chromosomes; protects centromeric Rec8p at meiosis I; required for accurate chromosomal segregation at meiosis II and for mitotic chromosome stability
Spindle pole body	YLR457C	NBP1	GCR	nbp1-1	Essential	Not Determined	This Study	Spindle pole body (SPB) component, required for the insertion of the duplication plaque into the nuclear membrane during SPB duplication; essential for bipolar spindle formation; component of the Mps2p-Bbp1p complex
Spindle pole body	YGL093W	SPC105	CTF x2	spc105-4, spc105-15	Essential	Strong (multiple hit)	This Study	Protein required for accurate chromosome segregation, localizes to the nuclear side of the spindle pole body; forms a complex with Ydr532cp
Spindle pole body	YPL253C	VIK1	BiM	N/A	Non-essential	Not Determined	[8]	Protein that forms a complex with Kar3p at the spindle pole body, possible regulator of Kar3p function in microtubule-mediated processes; required for sister chromatid cohesion; has similarity to Cik1p
Spindle pole body	YNL126W	SPC98	CTF, ALF	spc98-ts	Essential	Strong (multiple hit)	[3] and this study	Component of the microtubule-nucleating Tub4p (gamma-tubulin) complex; interacts with Spc110p at the spindle pole body (SPB) inner plaque and with Spc72p at the SPB outer plaque
Spindle pole body	YHR172W	SPC97	ALF	spc97-ts	Essential	Not Determined	This Study	Component of the microtubule-nucleating Tub4p (gamma-tubulin) complex; interacts with Spc110p at the spindle pole body (SPB) inner plaque and with Spc72p at the SPB outer plaque
Spindle pole body	YKL042W	SPC42	CTF	spc42-11	Essential	Strong (single hit)	This Study	Central plaque component of spindle pole body (SPB); involved in SPB duplication, may facilitate attachment of the SPB to the nuclear membrane
Spindle pole body	YOL091W	SPO21	BiM	N/A	Non-essential	Not Determined	[8]	Component of the meiotic outer plaque of the spindle pole body, involved in modifying the meiotic outer plaque that is required prior to prospore membrane formation
Spindle pole body	YDR356W	SPC110	CTF, ALF	spc110-220	Essential	Strong (multiple hit)	This Study	Inner plaque spindle pole body (SPB) component, ortholog of human kendrin; involved in connecting nuclear microtubules to SPB; interacts with Tub4p-complex and calmodulin; phosphorylated by Mps1p in cell cycle-dependent manner
Spindle pole body	YDR532C	KRE28	BiM, ALF	N/A	Non-essential	Strong (multiple hit)	[6]	Protein of unknown function that localizes to the nuclear side of the spindle pole body and along short spindles; deletion mutants have short telomeres; forms a complex with Spc105p
Spindle	YDL028C	MPS1	CTF x2, ALF	mps1-417, mps1-3796	Essential	Weak (multiple hit)	This Study	Dual-specificity kinase required for spindle pole body (SPB) duplication and spindle checkpoint function; substrates include SPB proteins Spc42p, Spc110p, and Spc98p, mitotic exit network protein Mob1p, and checkpoint protein Mad1p
Spindle	YOR058C	ASE1	ALF, BiM	N/A	Non-essential	Weak (multiple hit)	[6,8]	Mitotic spindle midzone localized microtubule-associated protein (MAP) family member; required for spindle elongation and stabilization; undergoes cell cycle-regulated degradation by anaphase promoting complex; potential Cdc28p substrate
Spindle	YBL031W	SHE1	CTF	N/A	Non-essential	Strong (single hit)	[6]	Mitotic spindle protein that interacts with components of the Dam1 (DASH) complex, its effector Sli15p, and microtubule-associated protein Bim1p; also localizes to nuclear microtubules and to the bud neck in a ring-shaped structure
Spindle	YBL034C	STU1	CTF x3	stu1-5, stu1-6, stu1-8	Essential	Strong (multiple hit)	This Study	Component of the mitotic spindle that binds to interpolar microtubules via its association with beta-tubulin (Tub2p); required for interpolar microtubules to provide an outward force on the spindle poles
Spindle	YCR065W	HCM1	BiMx2, ALF, LOH	N/A	Non-essential	Weak (multiple hit)	[2,6,8]	Forkhead transcription factor that drives S-phase specific expression of genes involved in chromosome segregation, spindle dynamics, and budding; suppressor of calmodulin mutants with specific SPB assembly defects; telomere maintenance role
Spindle	YEL061C	CIN8	CTF, BiM	N/A	Non-essential	Strong (multiple hit)	[6]	Kinesin motor protein involved in mitotic spindle assembly and chromosome segregation
Spindle	YMR198W	CIK1	CTFx2	N/A	Non-essential	Strong (multiple hit)	[6,11]	Kinesin-associated protein required for both karyogamy and mitotic spindle organization, interacts stably and specifically with Kar3p and may function to target this kinesin to a specific cellular role; has similarity to Vik1p
Spindle	YPL017C	IRC15	CTF,ALF, BiM	N/A	Non-essential	Strong (multiple hit)	[6,8]	Microtubule associated protein; regulates microtubule dynamics; required for accurate meiotic chromosome segregation; null mutant displays large budded cells due to delayed mitotic progression, increased levels of spontaneous Rad52 foci
Spindle	YDR130C	FIN1	CTF(overexpression)	N/A	Non-essential	Not Determined	[15]	Spindle pole body-related intermediate filament protein, forms cell cycle-specific filaments between spindle pole bodies in mother and daughter cells, able to self-assemble, expression induced during S/G2, localization cell-cycle dependent
Spindle	YER016W	BIM1	CTFx2, BiM, ALF	N/A	Non-essential	Strong (multiple hit)	[6,11]	Microtubule-binding protein that together with Kar9p makes up the cortical microtubule capture site and delays the exit from mitosis when the spindle is oriented abnormally
Spindle	YPR141C	KAR3	CTFx2,ALF	N/A	Non-essential	Strong (multiple hit)	[6,11]	Minus-end-directed microtubule motor that functions in mitosis and meiosis, localizes to the spindle pole body and localization is dependent on functional Cik1p, required for nuclear fusion during mating; potential Cdc28p substrate
Tubulin folding	YOR349W	CIN1	BiMx2, CTF	N/A	Non-essential	Weak (multiple hit)	[6,8,16]	Tubulin folding factor D involved in beta-tubulin (Tub2p) folding; isolated as mutant with increased chromosome loss and sensitivity to benomyl
Tubulin folding	YPL241C	CIN2	BiM, CTF	N/A	Non-essential	Weak (multiple hit)	[6,16]	GTPase-activating protein (GAP) for Cin4p; tubulin folding factor C involved in beta-tubulin (Tub2p) folding; mutants display increased chromosome loss and benomyl sensitivity; deletion complemented by human GAP, retinitis pigmentosa 2
Tubulin folding	YMR138W	CIN4	CTF	N/A	Non-essential	Strong (single hit)	[16]	GTP-binding protein involved in beta-tubulin (Tub2p) folding; isolated as mutant with increased chromosome loss and sensitivity to benomyl; regulated by the GTPase-activating protein, Cin2p, the human retinitis pigmentosa 2 (RP2) homolog
Tubulin folding	YER007W	PAC2	BiMx2	N/A	Non-essential	Weak (multiple hit)	[6,8]	Microtubule effector required for tubulin heterodimer formation, binds alpha-tubulin, required for normal microtubule function, null mutant exhibits cold-sensitive microtubules and sensitivity to benomyl
Tubulin folding	YEL003W	GIM4	ALF, BiM	N/A	Non-essential	Strong (multiple hit)	[6,8]	Subunit of the heterohexameric cochaperone prefoldin complex which binds specifically to cytosolic chaperonin and transfers target proteins to it
Tubulin folding	YML094W	GIM5	BiM, LOH	N/A	Non-essential	Weak (multiple hit)	[2,6]	Subunit of the heterohexameric cochaperone prefoldin complex which binds specifically to cytosolic chaperonin and transfers target proteins to it
Tubulin folding	YGR078C	PAC10	BiMx2, ALF	N/A	Non-essential	Weak (multiple hit)	[6,8]	Part of the heteromeric co-chaperone GimC/prefoldin complex, which promotes efficient protein folding
Tubulin folding	YJL179W	PFD1	BiMx2	N/A	Non-essential	Weak (multiple hit)	[6,8]	Subunit of heterohexameric prefoldin, which binds cytosolic chaperonin and transfers target proteins to it; involved in the biogenesis of actin and of alpha- and gamma-tubulin
Tubulin folding	YLR200W	YKE2	BiM	N/A	Non-essential	Not Determined	[8]	Subunit of the heterohexameric Gim/prefoldin protein complex involved in the folding of alpha-tubulin, beta-tubulin, and actin
Tubulin	YLR212C	TUB4	CTF x2	tub4-Y445D, tub4-DDSY	Essential	Strong (multiple hit)	This Study	Gamma-tubulin, involved in nucleating microtubules from both the cytoplasmic and nuclear faces of the spindle pole body
Tubulin	YML124C	TUB3	BiM	N/A	Non-essential	Weak (single hit)	[6]	Alpha-tubulin; associates with beta-tubulin (Tub2p) to form tubulin dimer, which polymerizes to form microtubules; expressed at lower level than Tub1p
Tubulin	YML085C	TUB1	CTF	N/A	Essential	Strong (single hit)	[16]	Alpha-tubulin; associates with beta-tubulin (Tub2p) to form tubulin dimer, which polymerizes to form microtubules
Tubulin	YFL037W	TUB2	Chromosome Missegregation	N/A	Essential	Not Determined	[17]	Beta-tubulin; associates with alpha-tubulin (Tub1p and Tub3p) to form tubulin dimer, which polymerizes to form microtubules
Mitotic Exit Network	YBR158W	AMN1	CTF (overexpression)	N/A	Non-essential	Not Determined	[9]	Protein required for daughter cell separation, multiple mitotic checkpoints, and chromosome stability; contains 12 degenerate leucine-rich repeat motifs; expression is induced by the Mitotic Exit Network (MEN)
Mitotic Exit Network	YFR028C	CDC14	CTF	cdc14-3	Essential	Weak (single hit)	This Study	Protein phosphatase required for mitotic exit; located in the nucleolus until liberated by the FEAR and Mitotic Exit Network in anaphase, enabling it to act on key substrates to effect a decrease in CDK/B-cyclin activity and mitotic exit
Mitotic Exit Network	YJR053W	BFA1	ALF	N/A	Non-essential	Weak (single hit)	[6]	Component of the GTPase-activating Bfa1p-Bub2p complex involved in multiple cell cycle checkpoint pathways that control exit from mitosis
Cell Cycle	YGR108W	CLB1	BiM	N/A	Non-essential	Not Determined	[8]	B-type cyclin involved in cell cycle progression; activates Cdc28p to promote the transition from G2 to M phase; accumulates during G2 and M, then targeted via a destruction box motif for ubiquitin-mediated degradation by the proteasome
Cell Cycle	YDL155W	CLB3	ALF, BiM	N/A	Non-essential	Weak (multiple hit)	[6,8]	B-type cyclin involved in cell cycle progression; activates Cdc28p to promote the G2/M transition; may be involved in DNA replication and spindle assembly; accumulates during S phase and G2, then targeted for ubiquitin-mediated degradation
Cell Cycle	YPR120C	CLB5	BiMx2, ALF, LOH	N/A	Non-essential	Weak (multiple hit)	[2,6,8]	B-type cyclin involved in DNA replication during S phase; activates Cdc28p to promote initiation of DNA synthesis; functions in formation of mitotic spindles along with Clb3p and Clb4p; most abundant during late G1 phase
Cell Cycle	YBR160W	CDC28	CTF	cdc28-13	Essential	Strong (single hit)	This study	Catalytic subunit of the main cell cycle cyclin-dependent kinase (CDK); alternately associates with G1 cyclins (CLNs) and G2/M cyclins (CLBs) which direct the CDK to specific substrates
Cell Cycle	YBR135W	CKS1	CTF x2	cks1-35, cks1-38	Essential	Strong (multiple hit)	This study	Cyclin-dependent protein kinase regulatory subunit and adaptor; modulates proteolysis of M-phase targets through interactions with the proteasome; role in transcriptional regulation, recruiting proteasomal subunits to target gene promoters
Cell Cycle	YAL040C	CLN3	CTF,ALF	N/A	Non-essential	Strong (multiple hit)	[6]	G1 cyclin involved in cell cycle progression; activates Cdc28p kinase to promote the G1 to S phase transition; plays a role in regulating transcription of the other G1 cyclins, CLN1 and CLN2; regulated by phosphorylation and proteolysis
Cell Cycle	YOR066W	MSA1	ALF	N/A	Non-essential	Weak (single hit)	[6]	Activator of G1-specific transcription factors, MBF and SBF; involved in regulation of the timing of G1-specific gene transcription and cell cycle initiation; localization is cell-cycle dependent and regulated by Cdc28p phosphorylation
Cell Cycle	YLR079W	SIC1	CTFx2, BiMx2, ALF, LOH	N/A	Non-essential	Strong (multiple hit)	[2,6,8,11]	Inhibitor of Cdc28-Clb kinase complexes that controls G1/S phase transition, preventing premature S phase and ensuring genomic integrity; phosphorylation targets Sic1p for SCF(CDC4)-dependent turnover; functional homolog of mammalian Kip1
Cell Cycle	YFL017C	GNA1	CTF	DAmP	Essential	Weak (single hit)	This study	Evolutionarily conserved glucosamine-6-phosphate acetyltransferase required for multiple cell cycle events including passage through START, DNA synthesis, and mitosis; involved in UDP-N-acetylglucosamine synthesis, forms GlcNAc6P from AcCoA
Cell Cycle	YPL031C	PHO85	BiM	N/A	Non-essential	Not Determined	[8]	Cyclin-dependent kinase, with ten cyclin partners; involved in regulating the cellular response to nutrient levels and environmental conditions and progression through the cell cycle
Cell Cycle	YOR083W	WHI5	BiM	N/A	Non-essential	Not Determined	[8]	Repressor of G1 transcription that binds to SCB binding factor (SBF) at SCB target promoters in early G1; phosphorylation of Whi5p by the CDK, Cln3p/Cdc28p relieves repression and promoter binding by Whi5; periodically expressed in G1
Cell Cycle	YCR008W	SAT4	BiM	N/A	Non-essential	Not Determined	[8]	Ser/Thr protein kinase involved in salt tolerance; funtions in regulation of Trk1p-Trk2p potassium transporter; partially redundant with Hal5p; has similarity to Npr1p
Cell Cycle	YML016C	PPZ1	BiM	N/A	Non-essential	Not Determined	[8]	Serine/threonine protein phosphatase Z, isoform of Ppz2p; involved in regulation of potassium transport, which affects osmotic stability, cell cycle progression, and halotolerance
Cell Cycle	YLR361C	DCR2	CTF (overexpression)	N/A	Non-essential	Not Determined	[18]	Phosphoesterase involved in downregulation of the unfolded protein response, at least in part via dephosphorylation of Ire1p; dosage-dependent positive regulator of the G1/S phase transition through control of the timing of START
Cell Cycle	YDR168W	CDC37	GCR	cdc37-1	Essential	Not Determined	This Study	Essential Hsp90p co-chaperone; necessary for passage through the START phase of the cell cycle; stabilizes protein kinase nascent chains and participates along with Hsp90p in their folding
Cell Cycle	YDR113C	PDS1	Chromosome Missegregation	N/A	Non-essential	Not Determined	[19]	Securin, inhibits anaphase by binding separin Esp1p; blocks cyclin destruction and mitotic exit, essential for meiotic progression and mitotic cell cycle arrest; localization is cell-cycle dependent and regulated by Cdc28p phosphorylation
SUMOylation	YDR510W	SMT3	CTF	smt3-331	Essential	Weak (single hit)	This study	Ubiquitin-like protein of the SUMO family, conjugated to lysine residues of target proteins; regulates chromatid cohesion, chromosome segregation, APC-mediated proteolysis, DNA replication and septin ring dynamics; phosphorylated at Ser2
SUMOylation	YDL064W	UBC9	GCR, ALF	ubc9-2	Essential	Strong (multiple hit)	This Study	SUMO-conjugating enzyme involved in the Smt3p conjugation pathway; nuclear protein required for S- and M-phase cyclin degradation and mitotic control; involved in proteolysis mediated by the anaphase-promoting complex cyclosome (APCC)
SUMOylation	YLR394W	CST9	CTF (overexpression)	N/A	Non-essential	Not Determined	[9]	SUMO E3 ligase; required for synaptonemal complex formation; localizes to synapsis initiation sites on meiotic chromosomes; potential Cdc28p substrate
Glc7 function	YER133W	GLC7	CTF x2	glc7-10, glc7-12	Essential	Weak (multiple hit)	This study	Type 1 serine/threonine protein phosphatase catalytic subunit, involved in many processes (eg: glycogen metabolism, sporulation, mitosis); accumulates at mating projections by interaction with Afr1p; interacts with many regulatory subunits
Glc7 function	YKL193C	SDS22	CTF	sds22-5	Essential	Strong (single hit)	This study	Conserved nuclear regulatory subunit of Glc7p type 1 protein serine-threonine phosphatase (PP1), functions positively with Glc7p to promote dephosphorylation of nuclear substrates required for chromosome transmission during mitosis
Glc7 function	YLR273C	PIG1	CTF	N/A	Non-essential	Strong (single hit)	[6]	Putative targeting subunit for the type-1 protein phosphatase Glc7p that tethers it to the Gsy2p glycogen synthase
Glc7 function	YMR311C	GLC8	BiM	N/A	Non-essential	Weak (single hit)	[6]	Regulatory subunit of protein phosphatase 1 (Glc7p), involved in glycogen metabolism and chromosome segregation; proposed to regulate Glc7p activity via conformational alteration; ortholog of the mammalian protein phosphatase inhibitor 2
Glc7 function	YBL058W	SHP1	CTF, BiM, ALF, LOH	N/A	Non-essential	Strong (multiple hit)	[2,6]	UBX (ubiquitin regulatory X) domain-containing protein that regulates Glc7p phosphatase activity and interacts with Cdc48p; interacts with ubiquitylated proteins in vivo and is required for degradation of a ubiquitylated model substrate
	YAL016W	TPD3	ALF	N/A	Non-essential	Strong (single hit)	[6]	Regulatory subunit A of the heterotrimeric protein phosphatase 2A, which also contains regulatory subunit Cdc55p and either catalytic subunit Pph21p or Pph22p; required for cell morphogenesis and for transcription by RNA polymerase III
	YOR014W	RTS1	ALF	N/A	Non-essential	Strong (single hit)	[6]	B-type regulatory subunit of protein phosphatase 2A (PP2A); homolog of the mammalian B' subunit of PP2A
DNA replication, repair and cohesion
Chromatin Cohesion	YIL026C	IRR1	CTF	irr1-1	Essential	Strong (single hit)	This study	Subunit of the cohesin complex, which is required for sister chromatid cohesion during mitosis and meiosis and interacts with centromeres and chromosome arms, essential for viability
Chromatin Cohesion	YDR014W	RAD61	CTFx2, BiM, ALF	N/A	Non-essential	Strong (multiple hit)	[6,11]	Subunit of a complex (Scc3p, Pds5p, Rad61p) that inhibits sister chromatid cohesion; inhibited by Eco1p-acetylated cohesin subunits Smc3p and Mcd1p; related to the human Wapl protein that controls the association of cohesin with chromatin
Chromatin Cohesion	YDR180W	SCC2	CTF, ALF, GCR	scc2-4	Essential	Strong (multiple hit)	This study	Subunit of cohesin loading factor (Scc2p-Scc4p), a complex required for loading of cohesin complexes onto chromosomes; involved in establishing sister chromatid cohesion during DSB repair via histone H2AX; evolutionarily-conserved adherin
Chromatin Cohesion	YER147C	SCC4	CTF, ALF	scc4-ts	Essential	Strong (multiple hit)	This study	Subunit of cohesin loading factor (Scc2p-Scc4p), a complex required for the loading of cohesin complexes onto chromosomes; involved in establishing sister chromatid cohesion during double-strand break repair via phosphorylated histone H2AX
Chromatin Cohesion	YDL003W	SCC1	CTF, ALF	scc1-73	Essential	Strong (multiple hit)	This study	Essential subunit of the cohesin complex required for sister chromatid cohesion in mitosis and meiosis; apoptosis induces cleavage and translocation of a C-terminal fragment to mitochondria; expression peaks in S phase
Chromatin Cohesion	YFL008W	SMC1	CTF	smc1-259	Essential	Strong (single hit)	This study	Subunit of the multiprotein cohesin complex, essential protein involved in chromosome segregation and in double-strand DNA break repair; SMC chromosomal ATPase family member, binds DNA with a preference for DNA with secondary structure
Chromatin Cohesion	YJL074C	SMC3	CTF	smc3-1	Essential	Strong (single hit)	This study	Subunit of the multiprotein cohesin complex required for sister chromatid cohesion in mitotic cells; also required, with Rec8p, for cohesion and recombination during meiosis; phylogenetically conserved SMC chromosomal ATPase family member
	YLR086W	SMC4	CTF	smc4-1	Essential	Weak (single hit)	This study	Subunit of the condensin complex; reorganizes chromosomes during cell division; forms a complex with Smc2p that has ATP-hydrolyzing and DNA-binding activity; required for tRNA gene clustering at the nucleolus; potential Cdc28p substrate
Meiotic recombination	YGL250W	RMR1	LOH	N/A	Non-essential	Weak (single hit)	[2]	Protein required for meiotic recombination and gene conversion; null mutant displays reduced PIS1 expression and growth defects on non-fermentable carbon sources and minimal media; GFP-fusion protein localizes to both cytoplasm and nucleus
Meiotic recombination	YDR285W	ZIP1	GCR	N/A	Non-essential	Strong (single hit)	[4]	Transverse filament protein of the synaptonemal complex; required for normal levels of meiotic recombination and pairing between homologous chromosome during meiosis; potential Cdc28p substrate
MCM complex	YIL150C	MCM10	GCR, ALF	mcm10-1	Essential	Strong (multiple hit)	This study	Essential chromatin-associated protein involved in the initiation of DNA replication; required for the association of the MCM2-7 complex with replication origins
MCM complex	YBL023C	MCM2	CTF, GCR	mcm2-1, DAmP	Essential	Strong (multiple hit)	This study	Protein involved in DNA replication; component of the Mcm2-7 hexameric complex that binds chromatin as a part of the pre-replicative complex
MCM complex	YEL032W	MCM3	MCM	N/A	Essential	Not Determined	[20]	Protein involved in DNA replication; component of the Mcm2-7 hexameric complex that binds chromatin as a part of the pre-replicative complex
MCM complex	YPR019W	MCM4	ALF	mcm4-ts	Essential	Not Determined	This study	Essential helicase component of heterohexameric MCM2-7 complexes which bind pre-replication complexes on DNA and melt the DNA prior to replication; accumulates in the nucleus in G1; homolog of S. pombe Cdc21p
MCM complex	YLR274W	MCM5	CTF, GCR	cdc46-1	Essential	Strong (multiple hit)	This study	Component of the hexameric MCM complex, which is important for priming origins of DNA replication in G1 and becomes an active ATP-dependent helicase that promotes DNA melting and elongation when activated by Cdc7p-Dbf4p in S-phase
MCM complex	YGL201C	MCM6	ALF	mcm6-ts	Essential	Not Determined	This study	Protein involved in DNA replication; component of the Mcm2-7 hexameric complex that binds chromatin as a part of the pre-replicative complex
MCM complex	YBR202W	MCM7	MCM, Chromosome Loss	N/A	Essential	Weak (multiple hit)	[20,21]	Component of the hexameric MCM complex, which is important for priming origins of DNA replication in G1 and becomes an active ATP-dependent helicase that promotes DNA melting and elongation when activated by Cdc7p-Dbf4p in S-phase
ORC	YML065W	ORC1	CTF, ALF	orc1-ts	Essential	Strong (multiple hit)	[3] and this study	Largest subunit of the origin recognition complex, which directs DNA replication by binding to replication origins and is also involved in transcriptional silencing; exhibits ATPase activity
ORC	YBR060C	ORC2	CTF x2, GCR x4	orc2-1, orc2-2, orc2-3, orc2-4	Essential	Weak (multiple hit)	This study	Subunit of the origin recognition complex, which directs DNA replication by binding to replication origins and is also involved in transcriptional silencing; interacts with Spp1p and with trimethylated histone H3; phosphorylated by Cdc28p
ORC	YLL004W	ORC3	GCR	orc3-70	Essential	Not Determined	This study	Subunit of the origin recognition complex, which directs DNA replication by binding to replication origins and is also involved in transcriptional silencing
ORC	YPR162C	ORC4	ALF	orc4-ts	Essential	Not Determined	This study	Subunit of the origin recognition complex, which directs DNA replication by binding to replication origins and is also involved in transcriptional silencing
ORC	YNL261W	ORC5	CTF	orc5-70	Essential	Weak (single hit)	This study	Subunit of the origin recognition complex, which directs DNA replication by binding to replication origins and is also involved in transcriptional silencing
ORC	YHR118C	ORC6	GCR, ALF	orc6-ts, DAmP	Essential	Strong (multiple hit)	This study	Subunit of the origin recognition complex, which directs DNA replication by binding to replication origins and is also involved in transcriptional silencing; phosphorylated by Cdc28p
DNA replication	YFR027W	ECO1	CTF	eco1-1	Essential	Strong (single hit)	This study	Acetytransferase required for sister chromatid cohesion; modifies Smc3p at DNA replication forks during S-phase; modifies Mcd1p in response to double-strand DNA breaks during G2/M; acetylation of cohesin subunits antagonizes Rad61p
DNA replication	YHR164C	DNA2	GCR	dna2-2	Essential	Not Determined	This study	Tripartite DNA replication factor with single-stranded DNA-dependent ATPase, ATP-dependent nuclease, and helicase activities; required for Okazaki fragment processing; involved in DNA repair; cell-cycle dependent localization
DNA replication	YNL102W	POL1	CTF x2, GCR	pol1-1, pol1-ts	Essential	Strong (multiple hit)	This study	Catalytic subunit of the DNA polymerase I alpha-primase complex, required for the initiation of DNA replication during mitotic DNA synthesis and premeiotic DNA synthesis
DNA replication	YDL102W	POL3	CTF x2, GCR	cdc2-2, cdc2-7	Essential	Strong (multiple hit)	This study	Catalytic subunit of DNA polymerase delta; required for chromosomal DNA replication during mitosis and meiosis, intragenic recombination, repair of double strand DNA breaks, and DNA replication during nucleotide excision repair (NER)
DNA replication	YBL035C	POL12	GCR	pol12-ts	Essential	Not Determined	This study	B subunit of DNA polymerase alpha-primase complex, required for initiation of DNA replication during mitotic and premeiotic DNA synthesis; also functions in telomere capping and length regulation
DNA replication	YBR088C	POL30	CTF, ALF	DAmP, pol30-ts	Essential	Strong (multiple hit)	This study	Proliferating cell nuclear antigen (PCNA), functions as the sliding clamp for DNA polymerase delta; may function as a docking site for other proteins required for mitotic and meiotic chromosomal DNA replication and for DNA repair
DNA replication	YJR006W	POL31	CTF, ALF	pol31-ts	Essential	Weak (multiple hit)	This study	DNA polymerase III (delta) subunit, essential for cell viability; involved in DNA replication and DNA repair
DNA replication	YJR046W	TAH11	GCR	tah11-ts	Essential	Not Determined	This study	DNA replication licensing factor, required for pre-replication complex assembly
DNA replication	YJR043C	POL32	BiM, ALF, LOH	N/A	Non-essential	Strong (multiple hit)	[2,6]	Third subunit of DNA polymerase delta, involved in chromosomal DNA replication; required for error-prone DNA synthesis in the presence of DNA damage and processivity; interacts with Hys2p, PCNA (Pol30p), and Pol1p
DNA replication	YLR103C	CDC45	CTF	cdc45-27	Essential	Weak (single hit)	This study	DNA replication initiation factor; recruited to MCM pre-RC complexes at replication origins; promotes release of MCM from Mcm10p, recruits elongation machinery; mutants in human homolog may cause velocardiofacial and DiGeorge syndromes
DNA replication	YJL194W	CDC6	CTF, GCR, ALF	cdc6-1	Essential	Weak (multiple hit)	This study	Essential ATP-binding protein required for DNA replication, component of the pre-replicative complex (pre-RC) which requires ORC to associate with chromatin and is in turn required for Mcm2-7p DNA association; homologous to S. pombe Cdc18p
DNA replication	YDL164C	CDC9	GCR, ALF	cdc9-1	Essential	Weak (multiple hit)	This study	DNA ligase found in the nucleus and mitochondria, an essential enzyme that joins Okazaki fragments during DNA replication; also acts in nucleotide excision repair, base excision repair, and recombination
DNA replication	YDR052C	DBF4	CTF x2, GCR, ALF	dbf4-1, dbf4-4	Essential	Weak (multiple hit)	This study	Regulatory subunit of Cdc7p-Dbf4p kinase complex, required for Cdc7p kinase activity and initiation of DNA replication; phosphorylates the Mcm2-7 family of proteins; cell cycle regulated
DNA replication	YOR080W	DIA2	CTF,ALF	N/A	Non-essential	Strong (multiple hit)	[6]	Origin-binding F-box protein that forms an SCF ubiquitin ligase complex with Skp1p and Cdc53p; plays a role in DNA replication, involved in invasive and pseudohyphal growth
DNA replication	YPR135W	CTF4	CTFx2, BiMx2, ALF	N/A	Non-essential	Strong (multiple hit)	[6,8,11]	Chromatin-associated protein, required for sister chromatid cohesion; interacts with DNA polymerase alpha (Pol1p) and may link DNA synthesis to sister chromatid cohesion
DNA replication	YBR278W	DPB3	LOH	N/A	Non-essential	Strong (single hit)	[2]	Third-largest subunit of DNA polymerase II (DNA polymerase epsilon), required to maintain fidelity of chromosomal replication and also for inheritance of telomeric silencing; mRNA abundance peaks at the G1/S boundary of the cell cycle
DNA replication	YDL017W	CDC7	CTF, GCR, ALF	cdc7-4	Essential	Strong (multiple hit)	This study	DDK (Dbf4-dependent kinase) catalytic subunit required for firing origins and replication fork progression in mitosis through phosphorylation of Mcm2-7p complexes and Cdc45p; kinase activity correlates with cyclical DBF4 expression
DNA replication	YDR439W	LRS4	LOH	N/A	Non-essential	Strong (single hit)	[2]	Nucleolar protein that forms a complex with Csm1p, and then Mam1p at kinetochores during meiosis I to mediate accurate homolog segregation; required for condensin recruitment to the replication fork barrier site and rDNA repeat segregation
DNA replication	YCR086W	CSM1	LOH	N/A	Non-essential	Strong (single hit)	[2]	Nucleolar protein that forms a complex with Lrs4p and then Mam1p at kinetochores during meiosis I to mediate accurate homolog segregation; required for condensin recruitment to the replication fork barrier site and rDNA repeat segregation
DNA replication	YKL108W	SLD2	GCR* (112, 3.89E-08)	DAmP	Essential	Strong (single hit)	This study	Protein required for DNA replication, phosphorylated in S phase by S-phase cyclin-dependent kinases (Cdks), phosphorylation is essential for DNA replication and for complex formation with Dpb11p; potential Cdc28p substrate
DNA replication	YGL113W	SLD3	CTF	sld3-ts	Essential	Weak (single hit)	This study	Protein involved in the initiation of DNA replication, required for proper assembly of replication proteins at the origins of replication; interacts with Cdc45p
GINS complex	YDR013W	PSF1	CTF, BiM, ALF	psf1-1, psf1-ts	Essential	Weak (single hit)	[1] and this study	Subunit of the GINS complex (Sld5p, Psf1p, Psf2p, Psf3p), which is localized to DNA replication origins and implicated in assembly of the DNA replication machinery
GINS complex	YJL072C	PSF2	CTF, ALF	N/A	Essential	Strong (multiple hit)	[1]	Subunit of the GINS complex (Sld5p, Psf1p, Psf2p, Psf3p), which is localized to DNA replication origins and implicated in assembly of the DNA replication machinery
GINS complex	YOL146W	PSF3	GCR	DAmP	Essential	Strong (multiple hit)	This study	Subunit of the GINS complex (Sld5p, Psf1p, Psf2p, Psf3p), which is localized to DNA replication origins and implicated in assembly of the DNA replication machinery
GINS complex	YDR489W	SLD5	BiM, ALF	sld5-ts	Essential	Strong (multiple hit)	[1] and this study	Subunit of the GINS complex (Sld5p, Psf1p, Psf2p, Psf3p), which is localized to DNA replication origins and implicated in assembly of the DNA replication machinery
RPA complex	YAR007C	RFA1	CTF	DAmP	Essential	Weak (single hit)	This study	Subunit of heterotrimeric Replication Protein A (RPA), which is a highly conserved single-stranded DNA binding protein involved in DNA replication, repair, and recombination
RPA complex	YNL312W	RFA2	ALF	rfa2-ts	Essential	Not Determined	This study	Subunit of heterotrimeric Replication Protein A (RPA), which is a highly conserved single-stranded DNA binding protein involved in DNA replication, repair, and recombination
Ribonucleotide reductase	YER070W	RNR1	ALF	N/A	Non-essential	Weak (single hit)	[6]	One of two large regulatory subunits of ribonucleotide-diphosphate reductase; the RNR complex catalyzes rate-limiting step in dNTP synthesis, regulated by DNA replication and DNA damage checkpoint pathways via localization of small subunits
Ribonucleotide reductase	YJL026W	RNR2	CTF (overexpression)	N/A	Essential	Not Determined	[9]	Ribonucleotide-diphosphate reductase (RNR), small subunit; the RNR complex catalyzes the rate-limiting step in dNTP synthesis and is regulated by DNA replication and DNA damage checkpoint pathways via localization of the small subunits
Ribonucleotide reductase	YGR180C	RNR4	ALF	N/A	Non-essential	Weak (single hit)	[6]	Ribonucleotide-diphosphate reductase (RNR), small subunit; the RNR complex catalyzes the rate-limiting step in dNTP synthesis and is regulated by DNA replication and DNA damage checkpoint pathways via localization of the small subunits
Rnase H2	YNL072W	RNH201	BiM, ALF, LOH	N/A	Non-essential	Weak (multiple hit)	[2,6]	Ribonuclease H2 catalytic subunit, removes RNA primers during Okazaki fragment synthesis; homolog of RNAse HI (the S. cerevisiae homolog of mammalian RNAse HII is RNH1); related to human AGS4 that causes Aicardi-Goutieres syndrome
Rnase H2	YDR279W	RNH202	BiM, ALF	N/A	Non-essential	Weak (multiple hit)	[6]	Ribonuclease H2 subunit, required for RNase H2 activity; related to human AGS2 that causes Aicardi-Goutieres syndrome
Rnase H2	YLR154C	RNH203	BiM, ALF	N/A	Non-essential	Weak (multiple hit)	[6]	Ribonuclease H2 subunit, required for RNase H2 activity; related to human AGS3 that causes Aicardi-Goutieres syndrome
RFC	YOR144C	ELG1	CTF, BiM, ALF, GCR, LOH	N/A	Non-essential	Strong (multiple hit)	[2,5,6]	Protein required for S phase progression and telomere homeostasis, forms an alternative replication factor C complex important for DNA replication and genome integrity; involved in homologous recombination-mediated DNA repair
RFC	YMR078C	CTF18	CTF,ALF, BiM	N/A	Non-essential	Strong (multiple hit)	[6,8]	Subunit of a complex with Ctf8p that shares some subunits with Replication Factor C and is required for sister chromatid cohesion; may have overlapping functions with Rad24p in the DNA damage replication checkpoint
RFC	YHR191C	CTF8	CTF, BiMx2, ALF, BooneCTF x2, GCR	N/A	Non-essential	Strong (multiple hit)	[6,8], and this study	Subunit of a complex with Ctf18p that shares some subunits with Replication Factor C and is required for sister chromatid cohesion
RFC	YCL016C	DCC1	CTF, BiM, ALF, LOH	N/A	Non-essential	Strong (multiple hit)	[2,6]	Subunit of a complex with Ctf8p and Ctf18p that shares some components with Replication Factor C, required for sister chromatid cohesion and telomere length maintenance
RFC	YJR068W	RFC2	CTF, CTF(overexpression), GCR	rfc2-1	Essential	Strong (multiple hit)	[9] and this study	Subunit of heteropentameric Replication factor C (RF-C), which is a DNA binding protein and ATPase that acts as a clamp loader of the proliferating cell nuclear antigen (PCNA) processivity factor for DNA polymerases delta and epsilon
RFC	YOL094C	RFC4	GCR, ALF	rfc4-20	Essential	Strong (multiple hit)	This study	Subunit of heteropentameric Replication factor C (RF-C), which is a DNA binding protein and ATPase that acts as a clamp loader of the proliferating cell nuclear antigen (PCNA) processivity factor for DNA polymerases delta and epsilon
RFC	YBR087W	RFC5	CTF	rfc5-1	Essential	Weak (single hit)	This study	Subunit of heteropentameric Replication factor C (RF-C), which is a DNA binding protein and ATPase that acts as a clamp loader of the proliferating cell nuclear antigen (PCNA) processivity factor for DNA polymerases delta and epsilon
Primase	YIR008C	PRI1	ALF, GCR* (26, 9.19E-09)	pri1-ts, DAmP	Essential	Strong (multiple hit)	This study	Subunit of DNA primase, which is required for DNA synthesis and double-strand break repair
Primase	YKL045W	PRI2	GCR(ts), GCR* (11, 3.79E-09)	pri2-ts, DAmP	Essential	Strong (multiple hit)	This study	Subunit of DNA primase, which is required for DNA synthesis and double-strand break repair
DNA repair	YBR274W	CHK1	GCR	N/A	Non-essential	Strong (single hit)	[22]	Serine/threonine kinase and DNA damage checkpoint effector, mediates cell cycle arrest via phosphorylation of Pds1p; phosphorylated by checkpoint signal transducer Mec1p; homolog of S. pombe and mammalian Chk1 checkpoint kinase
DNA repair	YPL022W	RAD1	ALF	N/A	Non-essential	Weak (single hit)	[6]	Single-stranded DNA endonuclease (with Rad10p), cleaves single-stranded DNA during nucleotide excision repair and double-strand break repair; subunit of Nucleotide Excision Repair Factor 1 (NEF1); homolog of human XPF protein
DNA repair	YML095C	RAD10	BiMx2, ALF	N/A	Non-essential	Weak (multiple hit)	[6,8]	Single-stranded DNA endonuclease (with Rad1p), cleaves single-stranded DNA during nucleotide excision repair and double-strand break repair; subunit of Nucleotide Excision Repair Factor 1 (NEF1); homolog of human ERCC1 protein
DNA repair	YOR368W	RAD17	BiM, ALF	N/A	Non-essential	Strong (multiple hit)	[6]	Checkpoint protein, involved in the activation of the DNA damage and meiotic pachytene checkpoints; with Mec3p and Ddc1p, forms a clamp that is loaded onto partial duplex DNA; homolog of human and S. pombe Rad1 and U. maydis Rec1 proteins
DNA repair	YCR066W	RAD18	BiM, ALF, GCR, GCR, LOH	N/A	Non-essential	Strong (multiple hit)	[2,4-6]	Protein involved in postreplication repair; binds single-stranded DNA and has single-stranded DNA dependent ATPase activity; forms heterodimer with Rad6p; contains RING-finger motif
DNA repair	YER173W	RAD24	BiM, ALF	N/A	Non-essential	Weak (multiple hit)	[6]	Checkpoint protein, involved in the activation of the DNA damage and meiotic pachytene checkpoints; subunit of a clamp loader that loads Rad17p-Mec3p-Ddc1p onto DNA; homolog of human and S. pombe Rad17 protein
DNA repair	YKL113C	RAD27	CTF, BiM, ALF, GCR, LOH	N/A	Non-essential	Strong (multiple hit)	[2,4,6]	5' to 3' exonuclease, 5' flap endonuclease, required for Okazaki fragment processing and maturation as well as for long-patch base-excision repair; member of the S. pombe RAD2/FEN1 family
DNA repair	YER162C	RAD4	LOH	N/A	Non-essential	Weak (single hit)	[2]	Protein that recognizes and binds damaged DNA (with Rad23p) during nucleotide excision repair; subunit of Nuclear Excision Repair Factor 2 (NEF2); homolog of human XPC protein
DNA repair	YLR032W	RAD5	BiM, ALF, GCR, GCR	N/A	Non-essential	Strong (multiple hit)	[4-6]	DNA helicase proposed to promote replication fork regression during postreplication repair by template switching; RING finger containing ubiquitin ligase; stimulates the synthesis of free and PCNA-bound polyubiquitin chains by Ubc13p-Mms2p
DNA repair	YNL250W	RAD50	CTF, BiM, ALF, LOH	N/A	Non-essential	Strong (multiple hit)	[2,6]	Subunit of MRX complex, with Mre11p and Xrs2p, involved in processing double-strand DNA breaks in vegetative cells, initiation of meiotic DSBs, telomere maintenance, and nonhomologous end joining
DNA repair	YER095W	RAD51	BiM, ALF, LOH	N/A	Non-essential	Strong (multiple hit)	[2,6]	Strand exchange protein, forms a helical filament with DNA that searches for homology; involved in the recombinational repair of double-strand breaks in DNA during vegetative growth and meiosis; homolog of Dmc1p and bacterial RecA protein
DNA repair	YML032C	RAD52	CTF, BiM, ALF	N/A	Non-essential	Strong (multiple hit)	[6]	Protein that stimulates strand exchange by facilitating Rad51p binding to single-stranded DNA; anneals complementary single-stranded DNA; involved in the repair of double-strand breaks in DNA during vegetative growth and meiosis
DNA repair	YGL163C	RAD54	CTF, BiM, ALF, LOH	N/A	Non-essential	Strong (multiple hit)	[2,6]	DNA-dependent ATPase, stimulates strand exchange by modifying the topology of double-stranded DNA; involved in the recombinational repair of double-strand breaks in DNA during vegetative growth and meiosis; member of the SWI/SNF family
DNA repair	YDR076W	RAD55	BiM, ALF	N/A	Non-essential	Strong (multiple hit)	[6]	Protein that stimulates strand exchange by stabilizing the binding of Rad51p to single-stranded DNA; involved in the recombinational repair of double-strand breaks in DNA during vegetative growth and meiosis; forms heterodimer with Rad57p
DNA repair	YDR004W	RAD57	BiM, ALF	N/A	Non-essential	Strong (multiple hit)	[6]	Protein that stimulates strand exchange by stabilizing the binding of Rad51p to single-stranded DNA; involved in the recombinational repair of double-strand breaks in DNA during vegetative growth and meiosis; forms heterodimer with Rad55p
DNA repair	YDL059C	RAD59	BiM, ALF	N/A	Non-essential	Weak (multiple hit)	[6]	Protein involved in the repair of double-strand breaks in DNA during vegetative growth via recombination and single-strand annealing; anneals complementary single-stranded DNA; homologous to Rad52p
DNA repair	YGL058W	RAD6	CTF,ALF, GCR, LOH	N/A	Non-essential	Strong (multiple hit)	[2,4,6]	Ubiquitin-conjugating enzyme (E2), involved in postreplication repair (with Rad18p), sporulation, telomere silencing, and ubiquitin-mediated N-end rule protein degradation (with Ubr1p)
DNA repair	YDR217C	RAD9	BiM, ALF	N/A	Non-essential	Strong (multiple hit)	[6]	DNA damage-dependent checkpoint protein, required for cell-cycle arrest in G1/S, intra-S, and G2/M; transmits checkpoint signal by activating Rad53p and Chk1p; hyperphosphorylated by Mec1p and Tel1p; potential Cdc28p substrate
DNA repair	YBR073W	RDH54	CTF, BiM, ALF	N/A	Non-essential	Strong (multiple hit)	[6]	DNA-dependent ATPase, stimulates strand exchange by modifying the topology of double-stranded DNA; involved in recombinational repair of DNA double-strand breaks during mitosis and meiosis; proposed to be involved in crossover interference
DNA repair	YPL194W	DDC1	CTF, BiM, ALF	N/A	Non-essential	Strong (multiple hit)	[6]	DNA damage checkpoint protein, part of a PCNA-like complex required for DNA damage response, required for pachytene checkpoint to inhibit cell cycle in response to unrepaired recombination intermediates; potential Cdc28p substrate
DNA repair	YDR440W	DOT1	ALF	N/A	Non-essential	Weak (single hit)	[6]	Nucleosomal histone H3-Lys79 methylase; methylation is required for telomeric silencing, meiotic checkpoint control, and DNA damage response
DNA repair	YDL101C	DUN1	ALF, LOH	N/A	Non-essential	Strong (multiple hit)	[2,6]	Cell-cycle checkpoint serine-threonine kinase required for DNA damage-induced transcription of certain target genes, phosphorylation of Rad55p and Sml1p, and transient G2/M arrest after DNA damage; also regulates postreplicative DNA repair
DNA repair	YBR136W	MEC1	Chromosome Breakage	N/A	Essential	Not Determined	[23]	Genome integrity checkpoint protein and PI kinase superfamily member; signal transducer required for cell cycle arrest and transcriptional responses prompted by damaged or unreplicated DNA; monitors and participates in meiotic recombination
DNA repair	YLR288C	MEC3	CTF, BiM, ALF	N/A	Non-essential	Strong (multiple hit)	[6]	DNA damage and meiotic pachytene checkpoint protein; subunit of a heterotrimeric complex (Rad17p-Mec3p-Ddc1p) that forms a sliding clamp, loaded onto partial duplex DNA by a clamp loader complex; homolog of human and S. pombe Hus1
DNA repair	YPR164W	MMS1	CTF, BiM, ALF, LOH	N/A	Non-essential	Strong (multiple hit)	[2,6]	Subunit of an E3 ubiquitin ligase complex involved in resolving replication intermediates or preventing the damage caused by blocked replication forks; regulates Ty1 transposition; involved with Rtt101p in nonfunctional rRNA decay
DNA repair	YLR320W	MMS22	CTF, BiM, ALF	N/A	Non-essential	Strong (multiple hit)	[6]	Protein that acts with Mms1p in a repair pathway that may be involved in resolving replication intermediates or preventing the damage caused by blocked replication forks; required for accurate meiotic chromosome segregation
DNA repair	YBR098W	MMS4	CTF, BiM, ALF, GCR	N/A	Non-essential	Strong (multiple hit)	[5,6]	Subunit of the structure-specific Mms4p-Mus81p endonuclease that cleaves branched DNA; involved in recombination, DNA repair, and joint molecule formation/resolution during meiotic recombination
DNA repair	YIR002C	MPH1	BiM	N/A	Non-essential	Weak (single hit)	[6]	Member of the DEAH family of helicases, functions in an error-free DNA damage bypass pathway that involves homologous recombination, binds to flap DNA and stimulates activity of Rad27p and Dna2p; mutations confer a mutator phenotype
DNA repair	YCL061C	MRC1	CTF, BiMx2, ALF	N/A	Non-essential	Strong (multiple hit)	[6,8]	S-phase checkpoint protein required for DNA replication; interacts with and stabilizes Pol2p at stalled replication forks during stress, where it forms a pausing complex with Tof1p and is phosphorylated by Mec1p; protects uncapped telomeres
DNA repair	YMR224C	MRE11	CTF, BiMx2, ALF	N/A	Non-essential	Strong (multiple hit)	[4,6]	Subunit of a complex with Rad50p and Xrs2p (MRX complex) that functions in repair of DNA double-strand breaks and in telomere stability, exhibits nuclease activity that appears to be required for MRX function; widely conserved
DNA repair	YPL153C	RAD53	CTF (loss)	N/A	Non-essential	Not Determined	[24]	Protein kinase, required for cell-cycle arrest in response to DNA damage; activated by trans autophosphorylation when interacting with hyperphosphorylated Rad9p; also interacts with ARS1 and plays a role in initiation of DNA replication
DNA repair	YIL139C	REV7	GCR	N/A	Non-essential	Weak (single hit)	[4]	Processivity subunit of DNA polymerase zeta, which is involved in DNA repair and translesion synthesis; required for mutagenesis induced by DNA damage
DNA repair	YHR154W	RTT107	BiM, ALF	N/A	Non-essential	Strong (multiple hit)	[6]	Protein implicated in Mms22-dependent DNA repair during S phase, DNA damage induces phosphorylation by Mec1p at one or more SQ/TQ motifs; interacts with Mms22p and Slx4p; has four BRCT domains; has a role in regulation of Ty1 transposition
DNA repair	YLL002W	RTT109	BiM, ALF, LOH	N/A	Non-essential	Strong (multiple hit)	[2.6]	Histone acetyltransferase critical for cell survival in the presence of DNA damage during S phase; acetylates H3-K56 and H3-K9; involved in non-homologous end joining and in regulation of Ty1 transposition; interacts physically with Vps75p
DNA repair	YNL273W	TOF1	CTF, BiMx2, ALF	N/A	Non-essential	Strong (multiple hit)	[6,8]	Subunit of a replication-pausing checkpoint complex (Tof1p-Mrc1p-Csm3p) that acts at the stalled replication fork to promote sister chromatid cohesion after DNA damage, facilitating gap repair of damaged DNA; interacts with the MCM helicase
DNA repair	YHR134W	WSS1	ALF, GCR, LOH	N/A	Non-essential	Strong (multiple hit)	[2,4,6]	Sumoylated protein of unknown function, identified based on genetic interactions with SMT3; UV-sensitive mutant phenotype and genetic interactions suggest a role in the DNA damage response, processing stalled or collapsed replication forks
DNA repair	YDR369C	XRS2	BiM, ALF, LOH	N/A	Non-essential	Strong (multiple hit)	[2,6]	Protein required for DNA repair; component of the Mre11 complex, which is involved in double strand breaks, meiotic recombination, telomere maintenance, and checkpoint signaling
DNA repair	YIL132C	CSM2	GCR	N/A	Non-essential	Weak (single hit)	[5]	Protein involved in a Rad51p-, Rad54p-dependent pathway for homologous recombination repair, required for accurate chromosome segregation during meiosis
DNA repair	YNL133C	FYV6	ALF	N/A	Non-essential	Strong (single hit)	[6]	Protein of unknown function, required for survival upon exposure to K1 killer toxin; proposed to regulate double-strand break repair via non-homologous end-joining
DNA repair	YDR386W	MUS81	BiM, ALF	N/A	Non-essential	Weak (multiple hit)	[6]	Subunit of the structure-specific Mms4p-Mus81p endonuclease that cleaves branched DNA; involved in DNA repair, replication fork stability, and joint molecule formation/resolution during meiotic recombination; helix-hairpin-helix protein
DNA repair	YLR007W	NSE1	CTF, ALF	nse1-16	Essential	Weak (multiple hit)	This study	Essential subunit of the Mms21-Smc5-Smc6 complex; nuclear protein required for DNA repair and growth; has a nonstructural role in the maintenance of chromosomes
DNA repair	YDR288W	NSE3	CTF, BiM, ALF	nse3-ts	Essential	Strong (multiple hit)	[1] and this study	Essential subunit of the Mms21-Smc5-Smc6 complex; protein of unknown function; required for DNA repair and growth
DNA repair	YDL105W	NSE4	CTF, BiM, ALF, GCR	nse4-ts2, nse4-ts	Essential	Weak (multiple hit)	[1] and this study	Nuclear protein that plays a role in the function of the Smc5p-Rhc18p complex
DNA repair	YML023C	NSE5	BiM, ALF	nse5-ts	Essential	Strong (multiple hit)	[1] and this study	Essential subunit of the Mms21-Smc5-Smc6 complex; required for cell viability and DNA repair
DNA repair	YHL006C	SHU1	ALF	N/A	Non-essential	Weak (single hit)	[6]	Protein involved in a Rad51p-, Rad54p-dependent pathway for homologous recombination repair, important for error-free repair of spontaneous and induced DNA lesions to protect the genome from mutation; associates with Shu2p, Psy3p, and Csm2p
DNA repair	YDL013W	SLX5	GCR, LOH	N/A	Non-essential	Strong (multiple hit)	[2,4]	Subunit of the Slx5-Slx8 SUMO-targeted ubiquitin ligase (STUbL) complex, stimulated by SUMO-modified substrates; contains a RING domain and two SIMs (SUMO-interacting motifs); forms SUMO-dependent nuclear foci, including DNA repair centers
DNA repair	YER116C	SLX8	CTF,BiM, GCR, LOH	N/A	Non-essential	Strong (multiple hit)	[2,4,6]	Subunit of the Slx5-Slx8 SUMO-targeted ubiquitin ligase (STUbL) complex; stimulated by prior attachment of SUMO to the substrate; contains a C-terminal RING domain
DNA repair	YJL092W	SRS2	BiM, ALF	N/A	Non-essential	Strong (multiple hit)	[6]	DNA helicase and DNA-dependent ATPase involved in DNA repair, needed for proper timing of commitment to meiotic recombination and transition from Meiosis I to II; blocks trinucleotide repeat expansion; affects genome stability
DNA repair	YJL047C	RTT101	ALF	N/A	Non-essential	Strong (single hit)	[6]	Cullin subunit of a Roc1p-dependent E3 ubiquitin ligase complex with a role in anaphase progression; implicated in Mms22-dependent DNA repair; involved with Mms1p in nonfunctional rRNA decay; modified by the ubiquitin-like protein, Rub1p
DNA repair	YMR048W	CSM3	CTF, BiMx2, ALF, LOH	N/A	Non-essential	Strong (multiple hit)	[2,6,8]	Protein required for accurate chromosome segregation during meiosis
DNA repair	YOL034W	SMC5	GCR	smc5-6	Essential	Not Determined	This study	Structural maintenance of chromosomes (SMC) protein; essential subunit of the Mms21-Smc5-Smc6 complex; required for growth and DNA repair; S. pombe homolog forms a heterodimer with S. pombe Rad18p that is involved in DNA repair
DNA repair	YLR383W	SMC6	GCR, Chromosome non-disjunction	smc6-9	Essential	Weak (multiple hit)	[25] and this study	Protein involved in structural maintenance of chromosomes; essential subunit of Mms21-Smc5-Smc6 complex; required for growth, DNA repair, interchromosomal and sister chromatid recombination; homologous to S. pombe rad18
DNA repair	YEL037C	RAD23	BiM	N/A	Non-essential	Not Determined	[8]	Protein with ubiquitin-like N terminus, recognizes and binds damaged DNA (with Rad4p) during nucleotide excision repair; regulates Rad4p levels, subunit of Nuclear Excision Repair Factor 2 (NEF2); homolog of human HR23A and HR23B proteins
DNA repair	YPL024W	RMI1	CTFx2, BiM, ALF, GCR	N/A	Non-essential	Strong (multiple hit)	[4,6,11]	Subunit of the RecQ (Sgs1p) - Topo III (Top3p) complex; stimulates superhelical relaxing and ssDNA binding activities of Top3p; involved in response to DNA damage; null mutants display increased rates of recombination and delayed S phase
DNA helicase	YMR190C	SGS1	BiM, ALF, GCR	N/A	Non-essential	Strong (multiple hit)	[4,6]	Nucleolar DNA helicase of the RecQ family involved in genome integrity maintenance; regulates chromosome synapsis and meiotic joint molecule/crossover formation; similar to human BLM and WRN proteins implicated in Bloom and Werner syndromes
DNA helicase	YPL008W	CHL1	CTFx2, BiMx2, ALF	N/A	Non-essential	Strong (multiple hit)	[6,8,11]	Conserved nuclear protein required to establish sister-chromatid pairing during S-phase, probable DNA helicase with similarity to human BACH1, which associates with tumor suppressor BRCA1; associates with acetyltransferase Ctf7p
DNA helicase	YHR031C	RRM3	BiM, ALF, LOH	N/A	Non-essential	Strong (multiple hit)	[2,6]	DNA helicase involved in rDNA replication and Ty1 transposition; relieves replication fork pauses at telomeric regions; structurally and functionally related to Pif1p
Topoisomerase	YLR234W	TOP3	BiM, ALF, GCR	N/A	Non-essential	Strong (multiple hit)	[4,6]	DNA Topoisomerase III, conserved protein that functions in a complex with Sgs1p and Rmi1p to relax single-stranded negatively-supercoiled DNA preferentially, involved in telomere stability and regulation of mitotic recombination
Topoisomerase	YOL006C	TOP1	LOH, BiM	N/A	Non-essential	Strong (multiple hit)	[2,8]	Topoisomerase I, nuclear enzyme that relieves torsional strain in DNA by cleaving and re-sealing the phosphodiester backbone; relaxes both positively and negatively supercoiled DNA; functions in replication, transcription, and recombination
Histone	YBR009C	HHF1	BiM, ALF	N/A	Non-essential	Strong (multiple hit)	[6]	Histone H4, core histone protein required for chromatin assembly and chromosome function; one of two identical histone proteins (see also HHF2); contributes to telomeric silencing; N-terminal domain involved in maintaining genomic integrity
Histone	YNL030W	HHF2	CTF (overexpression)	N/A	Non-essential	Not Determined	[9]	Histone H4, core histone protein required for chromatin assembly and chromosome function; one of two identical histone proteins (see also HHF1); contributes to telomeric silencing; N-terminal domain involved in maintaining genomic integrity
Histone	YNL031C	HHT2	CTF (overexpression)	N/A	Non-essential	Not Determined	[9]	Histone H3, core histone protein required for chromatin assembly, part of heterochromatin-mediated telomeric and HM silencing; one of two identical histone H3 proteins (see HHT1); regulated by acetylation, methylation, and phosphorylation
Histone	YOL012C	HTZ1	BiMx2	N/A	Non-essential	Weak (multiple hit)	[6,8]	Histone variant H2AZ, exchanged for histone H2A in nucleosomes by the SWR1 complex; involved in transcriptional regulation through prevention of the spread of silent heterochromatin
INO80	YLR052W	IES3	LOH	N/A	Non-essential	Weak (single hit)	[2]	Subunit of the INO80 chromatin remodeling complex
INO80	YDL002C	NHP10	LOH	N/A	Non-essential	Weak (single hit)	[2]	Protein related to mammalian high mobility group proteins; binds preferentially to DNA ends and is able to protect them from exonuclease cleavage; likely component of the INO80 complex, which is an ATP-dependent chromatin-remodeling complex
INO80	YPL235W	RVB2	CTF, ALF	rvb2-ts	Essential	Strong (multiple hit)	[3] and this study	Essential protein involved in transcription regulation; component of chromatin remodeling complexes; required for assembly and function of the INO80 complex; also referred to as reptin; member of the RUVB-like protein family
NuA4	YDR359C	EAF1	BiM	N/A	Non-essential	Weak (single hit)	[6]	Component of the NuA4 histone acetyltransferase complex; acts as a platform for assembly of NuA4 subunits into the native complex; required for initiation of pre-meiotic DNA replication, likely due to its requirement for expression of IME1
NuA4	YNL136W	EAF7	CTF	N/A	Non-essential	Not Determined	[26]	Subunit of the NuA4 histone acetyltransferase complex, which acetylates the N-terminal tails of histones H4 and H2A
NuA4	YNL107W	YAF9	GCR, BiM	N/A	Non-essential	Weak (multiple hit)	[4,8]	Subunit of both the NuA4 histone H4 acetyltransferase complex and the SWR1 complex, may function to antagonize silencing near telomeres; interacts directly with Swc4p, has homology to human leukemogenic protein AF9, contains a YEATS domain
SWR1 complex, NuA4	YGR002C	SWC4	CTF, BiM, ALF	swc4-4, swc4-ts	Essential	Weak (single hit)	[3] and this study	Component of the Swr1p complex that incorporates Htz1p into chromatin; component of the NuA4 histone acetyltransferase complex
SWR1 complex	YAL011W	SWC3	BiM, ALF	N/A	Non-essential	Weak (single hit)	[6]	Protein of unknown function, component of the SWR1 complex, which exchanges histone variant H2AZ (Htz1p) for chromatin-bound histone H2A; required for formation of nuclear-associated array of smooth endoplasmic reticulum known as karmellae
SWR1 complex	YBR231C	SWC5	BiMx2	N/A	Non-essential	Strong (multiple hit)	[6,8]	Protein of unknown function, component of the SWR1 complex, which exchanges histone variant H2AZ (Htz1p) for chromatin-bound histone H2A
SWR1 complex	YDR334W	SWR1	BiM	N/A	Non-essential	Weak (single hit)	[6]	Swi2/Snf2-related ATPase that is the structural component of the SWR1 complex, which exchanges histone variant H2AZ (Htz1p) for chromatin-bound histone H2A
RSC chromatin remodelling	YLR357W	RSC2	LOH	N/A	Non-essential	Weak (single hit)	[2]	Component of the RSC chromatin remodeling complex; required for expression of mid-late sporulation-specific genes; involved in telomere maintenance
RSC chromatin remodelling	YDR303C	RSC3	CTF	rsc3-1	Essential	Weak (single hit)	This study	Component of the RSC chromatin remodeling complex; essential gene required for maintenance of proper ploidy and regulation of ribosomal protein genes and the cell wall/stress response; highly similar to Rsc30p
RSC chromatin remodelling	YFR037C	RSC8	CTF	rsc8-ts21	Essential	Strong (single hit)	This study	Component of the RSC chromatin remodeling complex; essential for viability and mitotic growth; homolog of SWI/SNF subunit Swi3p, but unlike Swi3p, does not activate transcription of reporters
RSC chromatin remodelling	YMR033W	ARP9	CTF, GCR	arp9-1	Essential	Strong (multiple hit)	This study	Component of both the SWI/SNF and RSC chromatin remodeling complexes; actin-related protein involved in transcriptional regulation
RSC chromatin remodelling	YKR008W	RSC4	GCR	rsc4-2	Essential	Not Determined	This study	Component of the RSC chromatin remodeling complex; found in close proximity to nucleosomal DNA; displaced from the surface of nucleosomal DNA after chromatin remodeling
Chromatin and Transcription
Histones and Chromatin	YDL074C	BRE1	ALF	N/A	Non-essential	Strong (single hit)	[6]	E3 ubiquitin ligase for Rad6p, required for the ubiquitination of histone H2B, recruitment of Rad6p to promoter chromatin and subsequent methylation of histone H3 (on K4 and K79), contains RING finger domain
Histones and Chromatin	YPR068C	HOS1	CTF (overexpression)	N/A	Non-essential	Not Determined	[9]	Putative class I histone deacetylase (HDAC) with sequence similarity to Hda1p, Rpd3p, Hos2p, and Hos3p; deletion results in increased histone acetylation at rDNA repeats; interacts with the Tup1p-Ssn6p corepressor complex
Histones and Chromatin	YOR025W	HST3	BiM, ALF	N/A	Non-essential	Strong (multiple hit)	[6]	Member of the Sir2 family of NAD(+)-dependent protein deacetylases; involved along with Hst4p in telomeric silencing, cell cycle progression, radiation resistance, genomic stability and short-chain fatty acid metabolism
Histones and Chromatin	YDR191W	HST4	ALF	N/A	Non-essential	Weak (single hit)	[6]	Member of the Sir2 family of NAD(+)-dependent protein deacetylases; involved along with Hst3p in silencing at telomeres, cell cycle progression, radiation resistance, genomic stability and short-chain fatty acid metabolism
Histones and Chromatin	YDR176W	NGG1	BiM	N/A	Non-essential	Weak (single hit)	[6]	Transcriptional regulator involved in glucose repression of Gal4p-regulated genes; component of transcriptional adaptor and histone acetyltransferase complexes, the ADA complex, the SAGA complex, and the SLIK complex
Histones and Chromatin	YPR018W	RLF2	LOH	N/A	Non-essential	Strong (single hit)	[2]	Largest subunit (p90) of the Chromatin Assembly Complex (CAF-1) with Cac2p and Msi1p that assembles newly synthesized histones onto recently replicated DNA; involved in the maintenance of transcriptionally silent chromatin
Histones and Chromatin	YNL206C	RTT106	CTF	N/A	Non-essential	Weak (single hit)	[6]	Histone chaperone, involved in regulation of chromatin structure in both transcribed and silenced chromosomal regions; affects transcriptional elongation; has a role in regulation of Ty1 transposition
Histones and Chromatin	YJL127C	SPT10	ALF, BiM	N/A	Non-essential	Strong (multiple hit)	[6,8]	Putative histone acetylase, sequence-specific activator of histone genes, binds specifically and highly cooperatively to pairs of UAS elements in core histone promoters, functions at or near the TATA box
Histones and Chromatin	YER161C	SPT2	BiM, ALF	N/A	Non-essential	Strong (multiple hit)	[6]	Protein involved in negative regulation of transcription; required for RNA polyadenylation; exhibits regulated interactions with both histones and SWI-SNF components, has similarity to mammalian HMG1 proteins
Histones and Chromatin	YMR179W	SPT21	CTF, BiMx2, ALF	N/A	Non-essential	Strong (multiple hit)	[6,8]	Protein required for normal transcription at several loci including HTA2-HTB2 and HHF2-HHT2, but not required at the other histone loci; functionally related to Spt10p; involved in telomere maintenance
Histones and Chromatin	YGR270W	YTA7	BiM, ALF	N/A	Non-essential	Strong (multiple hit)	[6]	Protein that localizes to chromatin and has a role in regulation of histone gene expression; has a bromodomain-like region that interacts with the N-terminal tail of histone H3, and an ATPase domain; potentially phosphorylated by Cdc28p
Histones and Chromatin	YML102W	CAC2	BiM	N/A	Non-essential	Weak (single hit)	[6]	Component of the chromatin assembly complex (with Rlf2p and Msi1p) that assembles newly synthesized histones onto recently replicated DNA, required for building functional kinetochores, conserved from yeast to humans
Histones and Chromatin	YJL115W	ASF1	BiM, ALF, LOH	N/A	Non-essential	Strong (multiple hit)	[2,6]	Nucleosome assembly factor, involved in chromatin assembly and disassembly, anti-silencing protein that causes derepression of silent loci when overexpressed; plays a role in regulating Ty1 transposition
Histones and Chromatin	YPL055C	LGE1	CTFx2, BiMx2, ALF	N/A	Non-essential	Strong (multiple hit)	[6,8,11]	Protein of unknown function; null mutant forms abnormally large cells, and homozygous diploid null mutant displays delayed premeiotic DNA synthesis and reduced efficiency of meiotic nuclear division, {Important for Histone Methylase activity of Bre1, Hwang et al., 2002}
Histones and Chromatin	YBR195C	MSI1	LOH	N/A	Non-essential	Strong (single hit)	[2]	Subunit of chromatin assembly factor I (CAF-1), negative regulator of the RAS/cAMP pathway via sequestration of Npr1p kinase; localizes to the nucleus and cytoplasm; homologous to human retinoblastoma binding proteins RbAp48 and RbAp46
Histones and Chromatin	YFR013W	IOC3	ALF	N/A	Non-essential	Weak (single hit)	[6]	Member of a complex (Isw1a) with Isw1p that has nucleosome-stimulated ATPase activity and represses transcription initiation by specific positioning of a promoter proximal dinucleosome; has homology to Esc8p, which is involved in silencing
Histones and Chromatin	YJR060W	CBF1	ALF, BiM	N/A	Non-essential	Weak (multiple hit)	[6,8]	Helix-loop-helix protein that binds the motif CACRTG, which is present at several sites including MET gene promoters and centromere DNA element I (CDEI); required for nucleosome positioning at this motif; targets Isw1p to DNA
TTT, ASTRA	YGR099W	TEL2	ALF	tel2-15	Essential	Weak (single hit)	This study	Essential DNA-binding protein specific to single-stranded yeast telomeric DNA repeats, required for telomere length regulation and telomere position effect
TTT, ASTRA	YPR085C	ASA1	ALF	asa1-1	Essential	Weak (single hit)	This study	Putative protein of unknown function; subunit of the ASTRA complex (Rvb1p, Rvb2p, Tra1p, Tti1p, Tti2, Asa1p and Tra1p) which is part of the chromatin remodeling machinery
TTT, ASTRA	YKL033W	TTI1	ALF	tti1-1	Essential	Weak (single hit)	This study	Putative protein of unknown function; subunit of the ASTRA complex which is part of the chromatin remodeling machinery; similar to S. pombe Tti1p; detected in highly purified mitochondria in high-throughput studies
Telomeres	YMR219W	ESC1	GCR	N/A	Non-essential	Weak (single hit)	[5]	Protein localized to the nuclear periphery, involved in telomeric silencing; interacts with PAD4-domain of Sir4p
Telomeres	YDR363W	ESC2	BiM, ALF, GCR	N/A	Non-essential	Strong (multiple hit)	[4,6]	Protein involved in silencing; may recruit or stabilize Sir proteins; role in Rad51-dependent homologous recombination repair and intra S-phase DNA damage checkpoint; member of the RENi (Rad60-Esc2-Nip45) family of SUMO-like domain proteins
Telomeres	YIL009C-A	EST3	CTF, BiM	N/A	Non-essential	Strong (multiple hit)	[6]	Component of the telomerase holoenzyme, involved in telomere replication
Telomeres	YBR275C	RIF1	LOH	N/A	Non-essential	Weak (single hit)	[2]	Protein that binds to the Rap1p C-terminus and acts synergistically with Rif2p to help control telomere length and establish telomeric silencing; deletion results in telomere elongation
Telomeres	YOR209C	NPT1	LOH	N/A	Non-essential	Strong (single hit)	[2]	Nicotinate phosphoribosyltransferase, acts in the salvage pathway of NAD+ biosynthesis; required for silencing at rDNA and telomeres and has a role in silencing at mating-type loci; localized to the nucleus
Telomeres	YPL128C	TBF1	ALF	tbf1-ts	Essential	Not Determined	This study	Telobox-containing general regulatory factor; binds to TTAGGG repeats within subtelomeric anti-silencing regions (STARs) and possibly throughout the genome and mediates their insulating capacity by blocking silent chromatin propagation
Telomeres	YMR106C	YKU80	ALF	N/A	Non-essential	Weak (single hit)	[6]	Subunit of the telomeric Ku complex (Yku70p-Yku80p), involved in telomere length maintenance, structure and telomere position effect; relocates to sites of double-strand cleavage to promote nonhomologous end joining during DSB repair
Telomeres	YDL040C	NAT1	CTF (overexpression)	N/A	Non-essential	Not Determined	[9]	Subunit of the N-terminal acetyltransferase NatA (Nat1p, Ard1p, Nat5p); N-terminally acetylates many proteins, which influences multiple processes such as the cell cycle, heat-shock resistance, mating, sporulation, and telomeric silencing
Telomeres	YKL117W	SBA1	CTF (overexpression)	N/A	Non-essential	Not Determined	[9]	Co-chaperone that binds to and regulates Hsp90 family chaperones; important for pp60v-src activity in yeast; homologous to the mammalian p23 proteins and like p23 can regulate telomerase activity
SAGA complex	YPL047W	SGF11	CTF	N/A	Non-essential	Weak (single hit)	[6]	Integral subunit of SAGA histone acetyltransferase complex, regulates transcription of a subset of SAGA-regulated genes, required for the Ubp8p association with SAGA and for H2B deubiquitylation
SAGA complex	YGL066W	SGF73	CTFx2	N/A	Non-essential	Weak (multiple hit)	[6,11]	Subunit of SAGA histone acetyltransferase complex; involved in formation of the preinitiation complex assembly at promoters; null mutant displays defects in premeiotic DNA synthesis
TFIID	YGR274C	TAF1	CTF, GCR	taf1-1	Essential	Weak (multiple hit)	This study	TFIID subunit (145 kDa), involved in RNA polymerase II transcription initiation, has histone acetyltransferase activity, involved in promoter binding and G1/S progression
TFIID	YDR167W	TAF10	CTF	DAmP	Essential	Weak (single hit)	This study	Subunit (145 kDa) of TFIID and SAGA complexes, involved in RNA polymerase II transcription initiation and in chromatin modification
TFIID	YPL129W	TAF14	CTF (overexpression)	N/A	Non-essential	Not Determined	[9]	Subunit of TFIID, TFIIF, INO80, SWI/SNF, and NuA3 complexes, involved in RNA polymerase II transcription initiation and in chromatin modification; contains a YEATS domain
TFIID	YCR042C	TAF2	CTF	taf2-1	Essential	Weak (single hit)	This study	TFIID subunit (150 kDa), involved in RNA polymerase II transcription initiation
TFIID	YMR005W	TAF4	CTF, GCR	taf4-18	Essential	Strong (multiple hit)	This study	TFIID subunit (48 kDa), involved in RNA polymerase II transcription initiation; potential Cdc28p substrate
TFIID	YBR198C	TAF5	CTF, GCR	taf5-20	Essential	Weak (multiple hit)	This study	Subunit (90 kDa) of TFIID and SAGA complexes, involved in RNA polymerase II transcription initiation and in chromatin modification
TFIID	YMR227C	TAF7	CTF, GCR	taf7-ts1	Essential	Strong (multiple hit)	This study	TFIID subunit (67 kDa), involved in RNA polymerase II transcription initiation
TFIID	YML114C	TAF8	CTF	taf8-7	Essential	Strong (single hit)	This study	TFIID subunit (65 kDa), involved in RNA polymerase II transcription initiation
TFIID	YMR236W	TAF9	CTF	DAmP	Essential	Strong (single hit)	This study	Subunit (17 kDa) of TFIID and SAGA complexes, involved in RNA polymerase II transcription initiation and in chromatin modification, similar to histone H3
RNA polymerase and TFIIs	YLR071C	RGR1	GCR	rgr1-100	Essential	Not Determined	This study	Subunit of the RNA polymerase II mediator complex; associates with core polymerase subunits to form the RNA polymerase II holoenzyme; required for glucose repression, HO repression, RME1 repression and sporulation
RNA polymerase and TFIIs	YGL207W	SPT16	GCR	spt16-ts	Essential	Not Determined	This study	Subunit of the heterodimeric FACT complex (Spt16p-Pob3p), facilitates RNA Polymerase II transcription elongation through nucleosomes by destabilizing and then reassembling nucleosome structure
RNA polymerase and TFIIs	YBR123C	TFC1	GCR	tfc1-E447K	Essential	Not Determined	This study	One of six subunits of the RNA polymerase III transcription initiation factor complex (TFIIIC); part of the TauA globular domain of TFIIIC that binds DNA at the BoxA promoter sites of tRNA and similar genes; human homolog is TFIIIC-63
RNA polymerase and TFIIs	YKL028W	TFA1	CTF	DAmP	Essential	Weak (single hit)	This study	TFIIE large subunit, involved in recruitment of RNA polymerase II to the promoter, activation of TFIIH, and promoter opening
RNA polymerase and TFIIs	YKR062W	TFA2	CTF	tfa2-45	Essential	Weak (single hit)	This study	TFIIE small subunit, involved in RNA polymerase II transcription initiation
RNA polymerase and TFIIs	YDR311W	TFB1	CTF x2	tfb1-1, tfb1-6	Essential	Weak (multiple hit)	This study	Subunit of TFIIH and nucleotide excision repair factor 3 complexes, required for nucleotide excision repair, target for transcriptional activators
RNA polymerase and TFIIs	YDR460W	TFB3	CTF	tfb3-ts	Essential	Weak (single hit)	This study	Subunit of TFIIH and nucleotide excision repair factor 3 complexes, involved in transcription initiation, required for nucleotide excision repair; ring finger protein similar to mammalian CAK and TFIIH subunit
RNA polymerase and TFIIs	YJR063W	RPA12	BiM, ALF	N/A	Non-essential	Weak (multiple hit)	[6]	RNA polymerase I subunit A12.2; contains two zinc binding domains, and the N terminal domain is responsible for anchoring to the RNA pol I complex
RNA polymerase and TFIIs	YDR156W	RPA14	ALF, LOH	N/A	Non-essential	Weak (multiple hit)	[2,6]	RNA polymerase I subunit A14
RNA polymerase and TFIIs	YJL148W	RPA34	CTF (overexpression), LOH	N/A	Non-essential	Weak (multiple hit)	[2,6]	RNA polymerase I subunit A34.5
RNA polymerase and TFIIs	YIL021W	RPB3	CTF	DAmP	Essential	Weak (single hit)	This study	RNA polymerase II third largest subunit B44, part of central core; similar to prokaryotic alpha subunit
RNA polymerase and TFIIs	YJL140W	RPB4	CTF	N/A	Non-essential	Not Determined	[7]	RNA polymerase II subunit B32; forms two subunit dissociable complex with Rpb7p; involved recruitment of 3'-end processing factors to transcribing RNA polymerase II complex and in export of mRNA to cytoplasm under stress conditions
RNA polymerase and TFIIs	YBR154C	RPB5	CTF	rpb5-H147R	Essential	Weak (single hit)	This study	RNA polymerase subunit ABC27, common to RNA polymerases I, II, and III; contacts DNA and affects transactivation
RNA polymerase and TFIIs	YDR404C	RPB7	ALF	rpb7-ts	Essential	Not Determined	This study	RNA polymerase II subunit B16; forms two subunit dissociable complex with Rpb4p
RNA polymerase and TFIIs	YDR045C	RPC11	GCR, CTF	DAmP	Essential	Strong (multiple hit)	This study	RNA polymerase III subunit C11; mediates pol III RNA cleavage activity and is important for termination of transcription; homologous to TFIIS
RNA polymerase and TFIIs	YKR025W	RPC37	CTF	rpc37-ts	Essential	Strong (single hit)	This study	RNA polymerase III subunit C37
RNA polymerase and TFIIs	YLR005W	SSL1	CTFx2	ssl1-T242I	Essential	Strong (multiple hit)	This study	Component of the core form of RNA polymerase transcription factor TFIIH, which has both protein kinase and DNA-dependent ATPase/helicase activities and is essential for transcription and nucleotide excision repair; interacts with Tfb4p
RNA polymerase and TFIIs	YIL143C	SSL2	CTF	ssl2-ts	Essential	Weak (single hit)	This study	Component of the holoenzyme form of RNA polymerase transcription factor TFIIH, has DNA-dependent ATPase/helicase activity and is required, with Rad3p, for unwinding promoter DNA; involved in DNA repair; homolog of human ERCC3
RNA polymerase and TFIIs	YLR226W	BUR2	CTF (overexpression)	N/A	Non-essential	Not Determined	[9]	Cyclin for the Sgv1p (Bur1p) protein kinase; Sgv1p and Bur2p comprise a CDK-cyclin complex involved in transcriptional regulation through its phosphorylation of the carboxy-terminal domain of the largest subunit of RNA polymerase II
RNA polymerase and TFIIs	YLR418C	CDC73	CTF,ALF	N/A	Non-essential	Weak (multiple hit)	[6]	Component of the Paf1p complex that binds to and modulates the activity of RNA polymerases I and II; required for expression of certain genes, modification of some histones, and telomere maintenance
RNA polymerase and TFIIs	YJL006C	CTK2	CTF, BiM	N/A	Non-essential	Strong (multiple hit)	[6,8]	Beta subunit of C-terminal domain kinase I (CTDK-I), which phosphorylates both RNA pol II subunit Rpo21p to affect transcription and pre-mRNA 3' end processing, and ribosomal protein Rps2p to increase translational fidelity
RNA polymerase and TFIIs	YML112W	CTK3	LOH	N/A	Non-essential	Weak (single hit)	[2]	Gamma subunit of C-terminal domain kinase I (CTDK-I), which phosphorylates both RNA pol II subunit Rpo21p to affect transcription and pre-mRNA 3' end processing, and ribosomal protein Rps2p to increase translational fidelity
RNA polymerase and TFIIs	YNR010W	CSE2	Chromosome missegregation	N/A	Non-essential	Not Determined	[27]	Subunit of the RNA polymerase II mediator complex; associates with core polymerase subunits to form the RNA polymerase II holoenzyme; component of the Med9/10 module; required for regulation of RNA polymerase II activity
RNA polymerase and TFIIs	YHR058C	MED6	GCR* (13, 4.42E-09)	DAmP	Essential	Weak (single hit)	This study	Subunit of the RNA polymerase II mediator complex; associates with core polymerase subunits to form the RNA polymerase II holoenzyme; essential for transcriptional regulation
RNA polymerase and TFIIs	YGL151W	NUT1	BiM	N/A	Non-essential	Weak (single hit)	[6]	Component of the RNA polymerase II mediator complex, which is required for transcriptional activation and also has a role in basal transcription
RNA polymerase and TFIIs	YML069W	POB3	CTF x2	pob2-L78R, pob3-Q308K	Essential	Weak (multiple hit)	This study	Subunit of the heterodimeric FACT complex (Spt16p-Pob3p), which facilitates RNA Pol II transcription elongation through nucleosomes by destabilizing and then reassembling nucleosome structure; interacts with DNA polymerase alpha (Pol1p)
RNA polymerase and TFIIs	YOL054W	PSH1	BiM, ALF	N/A	Non-essential	Strong (multiple hit)	[6]	Nuclear protein, putative RNA polymerase II elongation factor; isolated as Pob3p/Spt16p-binding protein
RNA polymerase and TFIIs	YDL140C	RPO21	CTF	rpo21-1	Essential	Weak (single hit)	This study	RNA polymerase II largest subunit B220, part of central core; phosphorylation of C-terminal heptapeptide repeat domain regulates association with transcription and splicing factors; similar to bacterial beta-prime
RNA polymerase and TFIIs	YDR289C	RTT103	CTFx2	N/A	Non-essential	Strong (multiple hit)	[6,11]	Protein that interacts with exonuclease Rat1p and Rai1p and plays a role in transcription termination by RNA polymerase II, has an RPR domain (carboxy-terminal domain interacting domain); also involved in regulation of Ty1 transposition
RNA polymerase and TFIIs	YCR081W	SRB8	CTF	N/A	Non-essential	Weak (single hit)	[6]	Subunit of the RNA polymerase II mediator complex; associates with core polymerase subunits to form the RNA polymerase II holoenzyme; essential for transcriptional regulation; involved in glucose repression
RNA polymerase and TFIIs	YNL222W	SSU72	CTF	ssu72-2	Essential	Strong (single hit)	This study	Transcription/RNA-processing factor that associates with TFIIB and cleavage/polyadenylation factor Pta1p; exhibits phosphatase activity on serine-5 of the RNA polymerase II C-terminal domain; affects start site selection in vivo
RNA polymerase and TFIIs	YPR161C	SGV1	CTF x2	sgv1-35, sgv1-80	Essential	Weak (multiple hit)	This study	Cyclin (Bur2p)-dependent protein kinase that functions in transcriptional regulation; phosphorylates the carboxy-terminal domain of Rpo21p and the C-terminal repeat domain of Spt5p; regulated by Cak1p
RNA polymerase and TFIIs	YPR133C	SPN1	CTF	spn1-ts	Essential	Strong (single hit)	This study	Protein that interacts with Spt6p and copurifies with Spt5p and RNA polymerase II, probable transcriptional elongation factor; metazoan homologs contain an acidic N terminus; mutations in the gene confer an Spt- phenotype
Transcriptional control	YML010W	SPT5	CTF	stp5-194	Essential	Weak (single hit)	This study	Protein involved in regulating Pol I and Pol II transcription and pre-mRNA processing; forms a complex with Spt4p; contains a C-terminal repeat domain that is a target for phosphorylation by Sgv1p
Transcriptional control	YGR063C	SPT4	CTFx2	N/A	Non-essential	Weak (multiple hit)	[6,11]	Protein involved in the regulating Pol I and Pol II transcription, pre-mRNA processing, kinetochore function, and gene silencing; forms a complex with Spt5p
Transcriptional control	YMR043W	MCM1	CTF	mcm1-ts	Essential	Strong (single hit)	[3]	Transcription factor involved in cell-type-specific transcription and pheromone response; plays a central role in the formation of both repressor and activator complexes
Transcriptional control	YGL071W	AFT1	CTFx2	N/A	Non-essential	Weak (multiple hit)	[6,11]	Transcription factor involved in iron utilization and homeostasis; binds the consensus site PyPuCACCCPu and activates the expression of target genes in response to changes in iron availability
Transcriptional control	YGR044C	RME1	CTF (overexpression)	N/A	Non-essential	Not Determined	[9]	Zinc finger protein involved in control of meiosis; prevents meiosis by repressing IME1 expression and promotes mitosis by activating CLN2 expression; directly repressed by a1-alpha2 regulator; mediates cell type control of sporulation
Transcriptional control	YML099C	ARG81	ALF	N/A	Non-essential	Weak (single hit)	[6]	Zinc-finger transcription factor of the Zn(2)-Cys(6) binuclear cluster domain type, involved in the regulation of arginine-responsive genes; acts with Arg80p and Arg82p
Transcriptional control	YPL082C	MOT1	CTF	mot1-1033	Essential	Strong (single hit)	This study	Essential abundant protein involved in regulation of transcription, removes Spt15p (TBP) from DNA via its C-terminal ATPase activity, forms a complex with TBP that binds TATA DNA with high affinity but with altered specificity
Transcriptional control	YBR112C	CYC8	ALF	N/A	Non-essential	Strong (single hit)	[6]	General transcriptional co-repressor, acts together with Tup1p; also acts as part of a transcriptional co-activator complex that recruits the SWI/SNF and SAGA complexes to promoters; can form the prion [OCT+]
Transcriptional control	YKR038C	KAE1	CTF	kae1-ts	Essential	Strong (single hit)	[1]	Highly conserved putative glycoprotease proposed to be involved in transcription as a component of the EKC protein complex with Bud32p, Cgi121p, Pcc1p, and Gon7p; also identified as a component of the KEOPS protein complex
Transcriptional control	YHR206W	SKN7	LOH	N/A	Non-essential	Weak (single hit)	[2]	Nuclear response regulator and transcription factor, part of a branched two-component signaling system; required for optimal induction of heat-shock genes in response to oxidative stress; involved in osmoregulation
Transcriptional control	YNL257C	SIP3	ALF	N/A	Non-essential	Weak (single hit)	[6]	Protein that activates transcription through interaction with DNA-bound Snf1p, C-terminal region has a putative leucine zipper motif; potential Cdc28p substrate
Transcriptional control	YHR167W	THP2	CTF,ALF, GCR	N/A	Non-essential	Strong (multiple hit)	[4,6]	Subunit of the THO complex, which connects transcription elongation and mitotic recombination, and of the TREX complex, which is recruited to activated genes and couples transcription to mRNA export; involved in telomere maintenance
Transcriptional control	YML062C	MFT1	ALF	N/A	Non-essential	Weak (single hit)	[6]	Subunit of the THO complex, which is a nuclear complex comprised of Hpr1p, Mft1p, Rlr1p, and Thp2p, that is involved in transcription elongation and mitotic recombination; involved in telomere maintenance
Transcriptional control	YNL309W	STB1	CTF	N/A	Non-essential	Strong (single hit)	[6]	Protein with a role in regulation of MBF-specific transcription at Start, phosphorylated by Cln-Cdc28p kinases in vitro; unphosphorylated form binds Swi6p and binding is required for Stb1p function; expression is cell-cycle regulated
Transcriptional control	YIL084C	SDS3	CTF	N/A	Non-essential	Strong (single hit)	[5]	Component of the Rpd3p/Sin3p deacetylase complex required for its structural integrity and catalytic activity, involved in transcriptional silencing and required for sporulation; cells defective in SDS3 display pleiotropic phenotypes
Transcriptional control	YIL036W	CST6	CTF (overexpression)	N/A	Non-essential	Not Determined	[9]	Basic leucine zipper (bZIP) transcription factor of the ATF/CREB family, activates transcription of genes involved in utilization of non-optimal carbon sources; involved in telomere maintenance
Ribosome biogenesis and translation
Translation	YLR291C	GCD7	CTF	gcd7-ts	Essential	Weak (single hit)	[3]	Beta subunit of the translation initiation factor eIF2B, the guanine-nucleotide exchange factor for eIF2; activity subsequently regulated by phosphorylated eIF2; first identified as a negative regulator of GCN4 expression
Translation	YBR079C	RPG1	GCR	rpg1-1	Essential	Not Determined	This study	eIF3a subunit of the core complex of translation initiation factor 3 (eIF3), essential for translation; part of a subcomplex (Prt1p-Rpg1p-Nip1p) that stimulates binding of mRNA and tRNA(i)Met to ribosomes
Translation	YOR361C	PRT1	GCR	prt1-1	Essential	Not Determined	This study	eIF3b subunit of the core complex of translation initiation factor 3 (eIF3), essential for translation; part of a subcomplex (Prt1p-Rpg1p-Nip1p) that stimulates binding of mRNA and tRNA(i)Met to ribosomes
Translation	YOR260W	GCD1	CTF	gcd1-502	Essential	Strong (multiple hit)	This study	Gamma subunit of the translation initiation factor eIF2B, the guanine-nucleotide exchange factor for eIF2; activity subsequently regulated by phosphorylated eIF2; first identified as a negative regulator of GCN4 expression
Translation	YBR143C	SUP45	CTF	sup45-ts	Essential	Weak (single hit)	This study	Polypeptide release factor (eRF1) in translation termination; mutant form acts as a recessive omnipotent suppressor; methylated by Mtq2p-Trm112p in ternary complex eRF1-eRF3-GTP; mutation of methylation site confers resistance to zymocin
Translation	YEL034W	HYP2	CTF	hyp2-2	Essential	Weak (single hit)	This study	Translation elongation factor eIF-5A, previously thought to function in translation initiation; similar to and functionally redundant with Anb1p; structural homolog of bacterial EF-P; undergoes an essential hypusination modification
Translation	YJR047C	ANB1	ALF	N/A	Non-essential	Weak (single hit)	[6]	Translation elongation factor eIF-5A, previously thought to function in translation initiation; similar to and functionally redundant with Hyp2p; undergoes an essential hypusination modification; expressed under anaerobic conditions
Translation	YDR172W	SUP35	CTF	DAmP	Essential	Weak (single hit)	This study	Translation termination factor eRF3; altered protein conformation creates the [PSI(+)] prion, a dominant cytoplasmically inherited protein aggregate that alters translational fidelity and creates a nonsense suppressor phenotype
Translation	YPL179W	PPQ1	CTF	N/A	Non-essential	Weak (single hit)	[6]	Putative protein serine/threonine phosphatase; null mutation enhances efficiency of translational suppressors
Ribosome Biogenesis	YCR057C	PWP2	ALF	pwp2-ts	Essential	Not Determined	This study	Conserved 90S pre-ribosomal component essential for proper endonucleolytic cleavage of the 35 S rRNA precursor at A0, A1, and A2 sites; contains eight WD-repeats; PWP2 deletion leads to defects in cell cycle and bud morphogenesis
Ribosome Biogenesis	YOR272W	YTM1	CTF (overexpression)	N/A	Essential	Not Determined	[9]	Constituent of 66S pre-ribosomal particles, forms a complex with Nop7p and Erb1p that is required for maturation of the large ribosomal subunit; has seven C-terminal WD repeats
Ribosome Biogenesis	YMR049C	ERB1	GCR	DAmP	Essential	Strong (single hit)	This study	Constituent of 66S pre-ribosomal particles, forms a complex with Nop7p and Ytm1p that is required for maturation of the large ribosomal subunit; required for maturation of the 25S and 5.8S ribosomal RNAs; homologous to mammalian Bop1
Ribosome Biogenesis	YHR066W	SSF1	ALF	N/A	Non-essential	Weak (single hit)	[6]	Constituent of 66S pre-ribosomal particles, required for ribosomal large subunit maturation; functionally redundant with Ssf2p; member of the Brix family
Ribosome Biogenesis	YHR085W	IPI1	GCR* (<2, <8.42E-10)	DAmP	Essential	Weak (single hit)	This study	Essential component of the Rix1 complex (with Rix1p and Ipi3p) that is required for processing of ITS2 sequences from 35S pre-rRNA; Rix1 complex associates with Mdn1p in pre-60S ribosomal particles
Ribosome Biogenesis	YDR091C	RLI1	CTF	rli1-ts	Essential	Strong (single hit)	[3]	Essential iron-sulfur protein required for ribosome biogenesis and translation initiation; facilitates binding of a multifactor complex (MFC) of translation initiation factors to the small ribosomal subunit; predicted ABC family ATPase
Ribosome Biogenesis	YNR038W	DBP6	CTF	dbp6-ts	Essential	Strong (single hit)	This study	Essential protein involved in ribosome biogenesis; putative ATP-dependent RNA helicase of the DEAD-box protein family
Ribosome Biogenesis	YHR088W	RPF1	CTF, GCR	rpf1-1	Essential	Weak (multiple hit)	This study	Nucleolar protein involved in the assembly and export of the large ribosomal subunit; constituent of 66S pre-ribosomal particles; contains a sigma(70)-like motif, which is thought to bind RNA
Ribosome Biogenesis	YOL144W	NOP8	GCR	nop8-101	Essential	Not Determined	This study	Nucleolar protein required for 60S ribosomal subunit biogenesis
Ribosome Biogenesis	YNL002C	RLP7	CTF	rlp7-ts	Essential	Strong (single hit)	[3]	Nucleolar protein with similarity to large ribosomal subunit L7 proteins; constituent of 66S pre-ribosomal particles; plays an essential role in processing of precursors to the large ribosomal subunit RNAs
Ribosome Biogenesis	YLR222C	UTP13	CTF (overexpression)	N/A	Essential	Not Determined	[9]	Nucleolar protein, component of the small subunit (SSU) processome containing the U3 snoRNA that is involved in processing of pre-18S rRNA
Ribosome Biogenesis	YDR449C	UTP6	ALF	utp6-ts	Essential	Not Determined	This study	Nucleolar protein, component of the small subunit (SSU) processome containing the U3 snoRNA that is involved in processing of pre-18S rRNA
Ribosome Biogenesis	YLR002C	NOC3	CTF	DAmP	Essential	Weak (single hit)	This study	Protein that forms a nuclear complex with Noc2p that binds to 66S ribosomal precursors to mediate their intranuclear transport; also binds to chromatin to promote the association of DNA replication factors and replication initiation
Ribosome Biogenesis	YPR144C	NOC4	CTF	DAmP	Essential	Weak (single hit)	This study	Nucleolar protein, forms a complex with Nop14p that mediates maturation and nuclear export of 40S ribosomal subunits
Ribosome Biogenesis	YKR092C	SRP40	ALF	N/A	Non-essential	Weak (single hit)	[6]	Nucleolar, serine-rich protein with a role in preribosome assembly or transport; may function as a chaperone of small nucleolar ribonucleoprotein particles (snoRNPs); immunologically and structurally to rat Nopp140
Ribosome Biogenesis	YHR065C	RRP3	ALF	rrp3-ts	Essential	Not Determined	This study	Protein involved in rRNA processing; required for maturation of the 35S primary transcript of pre-rRNA and for cleavage leading to mature 18S rRNA; homologous to eIF-4a, which is a DEAD box RNA-dependent ATPase with helicase activity
Ribosome Biogenesis	YLR196W	PWP1	CTF	pwp1-ts	Essential	Strong (single hit)	[3]	Protein with WD-40 repeats involved in rRNA processing; associates with trans-acting ribosome biogenesis factors; similar to beta-transducin superfamily
Ribosome Biogenesis	YLR409C	UTP21	GCR	DAmP	Essential	Weak (single hit)	This study	Subunit of U3-containing 90S preribosome and Small Subunit (SSU) processome complexes involved in production of 18S rRNA and assembly of small ribosomal subunit; synthetic defect with STI1 Hsp90 cochaperone; human homolog linked to glaucoma
Ribosome Biogenesis	YDR398W	UTP5	CTF	utp5-ts	Essential	Strong (single hit)	[3]	Subunit of U3-containing Small Subunit (SSU) processome complex involved in production of 18S rRNA and assembly of small ribosomal subunit
Ribosome Biogenesis	YKR024C	DBP7	ALF	N/A	Non-essential	Weak (single hit)	[6]	Putative ATP-dependent RNA helicase of the DEAD-box family involved in ribosomal biogenesis; essential for growth under anaerobic conditions
Ribosome Biogenesis	YNL132W	KRE33	CTF	kre33-ts	Essential	Strong (single hit)	This study	Essential protein of unknown function; heterozygous mutant shows haploinsufficiency in K1 killer toxin resistance
Ribosome Biogenesis	YNL075W	IMP4	CTF	imp4-2	Essential	Weak (single hit)	This study	Component of the SSU processome, which is required for pre-18S rRNA processing; interacts with Mpp10p; member of a superfamily of proteins that contain a sigma(70)-like motif and associate with RNAs
Ribosomal core component	YKR094C	RPL40B	CTF (overexpression)	N/A	Non-essential	Not Determined	[9]	Fusion protein, identical to Rpl40Ap, that is cleaved to yield ubiquitin and a ribosomal protein of the large (60S) ribosomal subunit with similarity to rat L40; ubiquitin may facilitate assembly of the ribosomal protein into ribosomes
Ribosomal core component	YIL148W	RPL40A	CTF (overexpression)	N/A	Non-essential	Not Determined	[9]	Fusion protein, identical to Rpl40Bp, that is cleaved to yield ubiquitin and a ribosomal protein of the large (60S) ribosomal subunit with similarity to rat L40; ubiquitin may facilitate assembly of the ribosomal protein into ribosomes
Ribosomal core component	YKL006W	RPL14A	BiM	N/A	Non-essential	Weak (single hit)	[6]	N-terminally acetylated protein component of the large (60S) ribosomal subunit, nearly identical to Rpl14Bp and has similarity to rat L14 ribosomal protein; rpl14a csh5 double null mutant exhibits synthetic slow growth
Ribosomal core component	YGL030W	RPL30	CTF, ALF	rpl30-ts	Essential	Strong (multiple hit)	This study	Protein component of the large (60S) ribosomal subunit, has similarity to rat L30 ribosomal protein; involved in pre-rRNA processing in the nucleolus; autoregulates splicing of its transcript
Ribosomal core component	YIL018W	RPL2B	ALF	N/A	Non-essential	Strong (single hit)	[6]	Protein component of the large (60S) ribosomal subunit, identical to Rpl2Ap and has similarity to E. coli L2 and rat L8 ribosomal proteins; expression is upregulated at low temperatures
Ribosomal core component	YNL162W	RPL42A	GCR	DAmP	Essential	Weak (single hit)	This study	Protein component of the large (60S) ribosomal subunit, identical to Rpl42Bp and has similarity to rat L44 ribosomal protein
Ribosomal core component	YDL082W	RPL13A	ALF	N/A	Non-essential	Weak (single hit)	[6]	Protein component of the large (60S) ribosomal subunit, nearly identical to Rpl13Bp; not essential for viability; has similarity to rat L13 ribosomal protein
Ribosomal core component	YIL052C	RPL34B	ALF	N/A	Non-essential	Weak (single hit)	[6]	Protein component of the large (60S) ribosomal subunit, nearly identical to Rpl34Ap and has similarity to rat L34 ribosomal protein
Ribosomal core component	YGR027C	RPS25A	ALF	N/A	Non-essential	Weak (single hit)	[6]	Protein component of the small (40S) ribosomal subunit; nearly identical to Rps25Bp and has similarity to rat S25 ribosomal protein
Ribosomal core component	YBR189W	RPS9B	LOH	N/A	Non-essential	Weak (single hit)	[2]	Protein component of the small (40S) ribosomal subunit; nearly identical to Rps9Ap and has similarity to E. coli S4 and rat S9 ribosomal proteins
Ribosomal core component	YHL015W	RPS20	GCR	DAmP	Essential	Weak (single hit)	This study	Protein component of the small (40S) ribosomal subunit; overproduction suppresses mutations affecting RNA polymerase III-dependent transcription; has similarity to E. coli S10 and rat S20 ribosomal proteins
Ribosomal core component	YGR118W	RPS23A	CTF	N/A	Non-essential	Weak (single hit)	[6]	Ribosomal protein 28 (rp28) of the small (40S) ribosomal subunit, required for translational accuracy; nearly identical to Rps23Bp and similar to E. coli S12 and rat S23 ribosomal proteins; deletion of both RPS23A and RPS23B is lethal
Ribosomal core component	YGR148C	RPL24B	ALF	N/A	Non-essential	Weak (single hit)	[6]	Ribosomal protein L30 of the large (60S) ribosomal subunit, nearly identical to Rpl24Ap and has similarity to rat L24 ribosomal protein; not essential for translation but may be required for normal translation rate
tRNA biogenesis	YPL160W	CDC60	CTF	cdc60-ts	Essential	Weak (single hit)	This study	Cytosolic leucyl tRNA synthetase, ligates leucine to the appropriate tRNA
tRNA biogenesis	YLR060W	FRS1	CTF	frs1-ts	Essential	Strong (single hit)	[3]	Beta subunit of cytoplasmic phenylalanyl-tRNA synthetase, forms a tetramer with Frs2p to generate active enzyme; able to hydrolyze mis-aminoacylated tRNA-Phe, which could contribute to translational quality control
tRNA biogenesis	YFL022C	FRS2	CTF	DAmP	Essential	Weak (single hit)	This study	Alpha subunit of cytoplasmic phenylalanyl-tRNA synthetase, forms a tetramer with Frs1p to form active enzyme; evolutionarily distant from mitochondrial phenylalanyl-tRNA synthetase based on protein sequence, but substrate binding is similar
tRNA biogenesis	YOR168W	GLN4	GCR	DAmP	Essential	Strong (single hit)	This study	Glutamine tRNA synthetase, monomeric class I tRNA synthetase that catalyzes the specific glutaminylation of tRNA(Glu); N-terminal domain proposed to be involved in enzyme-tRNA interactions
tRNA biogenesis	YBR121C	GRS1	CTF	grs1-ts	Essential	Strong (single hit)	[3]	Cytoplasmic and mitochondrial glycyl-tRNA synthase that ligates glycine to the cognate anticodon bearing tRNA; transcription termination factor that may interact with the 3'-end of pre-mRNA to promote 3'-end formation
tRNA biogenesis	YGL245W	GUS1	CTF	gus1-ts	Essential	Strong (single hit)	This study	Glutamyl-tRNA synthetase (GluRS), forms a complex with methionyl-tRNA synthetase (Mes1p) and Arc1p; complex formation increases the catalytic efficiency of both tRNA synthetases and ensures their correct localization to the cytoplasm
tRNA biogenesis	YGR264C	MES1	CTF	mes1-1	Essential	Weak (single hit)	This study	Methionyl-tRNA synthetase, forms a complex with glutamyl-tRNA synthetase (Gus1p) and Arc1p, which increases the catalytic efficiency of both tRNA synthetases; also has a role in nuclear export of tRNAs
tRNA biogenesis	YLR316C	TAD3	CTF	DAmP	Essential	Weak (single hit)	This study	Subunit of tRNA-specific adenosine-34 deaminase, forms a heterodimer with Tad2p that converts adenosine to inosine at the wobble position of several tRNAs
tRNA biogenesis	YHR070W	TRM5	CTF	trm5-1	Essential	Strong (single hit)	[3]	tRNA(m(1)G37)methyltransferase, methylates a tRNA base adjacent to the anticodon that has a role in prevention of frameshifting; highly conserved across Archaea, Bacteria, and Eukarya
tRNA biogenesis	YHR020W	YHR020W	CTF, BiM, ALF	yhr020w-ts	Essential	Strong (multiple hit)	[1]	Protein of unknown function that may interact with ribosomes, based on co-purification experiments; has similarity to proline-tRNA ligase; YHR020W is an essential gene
RNase P	YBR167C	POP7	CTF	pop7-ts	Essential	Weak (single hit)	This study	Subunit of both RNase MRP, which cleaves pre-rRNA, and nuclear RNase P, which cleaves tRNA precursors to generate mature 5' ends
RNase P	YIR015W	RPR2	GCR	DAmP	Essential	Weak (single hit)	This study	Subunit of nuclear RNase P, which cleaves tRNA precursors to generate mature 5' ends; not shared between RNase MRP and RNase P, in contrast to all other RNase P protein subunits
Mitochondrial Functions
Import	YMR203W	TOM40	CTF	DAmP	Essential	Weak (single hit)	This study	Component of the TOM (translocase of outer membrane) complex responsible for recognition and initial import steps for all mitochondrially directed proteins; constitutes the core element of the protein conducting pore
Import	YNL131W	TOM22	ALF, CTF	DAmP	Essential	Weak (multiple hit)	This study	Component of the TOM (translocase of outer mitochondrial membrane) complex responsible for initial import of mitochondrially directed proteins; acts as a receptor for precursor proteins and mediates interaction between TOM and TIM complexes
Translation	YPR047W	MSF1	ALF, LOH	N/A	Non-essential	Weak (multiple hit)	[2,6]	Mitochondrial phenylalanyl-tRNA synthetase, active as a monomer, unlike the cytoplasmic subunit which is active as a dimer complexed to a beta subunit dimer; similar to the alpha subunit of E. coli phenylalanyl-tRNA synthetase
Translation	YGR171C	MSM1	ALF	N/A	Non-essential	Weak (single hit)	[6]	Mitochondrial methionyl-tRNA synthetase (MetRS), functions as a monomer in mitochondrial protein synthesis; functions similarly to cytoplasmic MetRS although the cytoplasmic form contains a zinc-binding domain not found in Msm1p
Translation	YBR282W	MRPL27	LOH	N/A	Non-essential	Strong (single hit)	[2]	Mitochondrial ribosomal protein of the large subunit
Translation	YML009C	MRPL39	ALF	N/A	Non-essential	Weak (single hit)	[6]	Mitochondrial ribosomal protein of the large subunit
Translation	YNL252C	MRPL17	BiM	N/A	Non-essential	Not Determined	[8]	Mitochondrial ribosomal protein of the large subunit
Translation	YEL050C	RML2	GCR, BiM	N/A	Non-essential	Weak (multiple hit)	[4,8]	Mitochondrial ribosomal protein of the large subunit, has similarity to E. coli L2 ribosomal protein; fat21 mutant allele causes inability to utilize oleate and may interfere with activity of the Adr1p transcription factor
Translation	YJL102W	MEF2	ALF	N/A	Non-essential	Weak (single hit)	[6]	Mitochondrial elongation factor involved in translational elongation
Iron Sulfur biogenesis	YPR067W	ISA2	BiM, ALF	N/A	Non-essential	Weak (multiple hit)	[6]	Protein required for maturation of mitochondrial and cytosolic Fe/S proteins, localizes to the mitochondrial intermembrane space, overexpression of ISA2 suppresses grx5 mutations
Iron Sulfur biogenesis	YER048W-A	ISD11	GCR	DAmP	Essential	Weak (single hit)	This study	Protein required for mitochondrial iron-sulfur cluster biosynthesis
Iron Sulfur biogenesis	YPL059W	GRX5	ALF	N/A	Non-essential	Weak (single hit)	[6]	Hydroperoxide and superoxide-radical responsive glutathione-dependent oxidoreductase; mitochondrial matrix protein involved in the synthesis/assembly of iron-sulfur centers; monothiol glutaredoxin subfamily member along with Grx3p and Grx4p
Iron Sulfur biogenesis	YLL027W	ISA1	BiM	N/A	Non-essential	Not Determined	[8]	Mitochondrial matrix protein involved in biogenesis of the iron-sulfur (Fe/S) cluster of Fe/S proteins, isa1 deletion causes loss of mitochondrial DNA and respiratory deficiency; depletion reduces growth on nonfermentable carbon sources
Iron Sulfur biogenesis	YKR071C	DRE2	CTF	dre2-ts	Essential	Strong (single hit)	[1]	Protein that may prevent apoptosis by forming a complex with Tah18p in the absence of stress; required for iron-sulfur cluster assembly and sister chromatid cohesion; homolog of human anti-apoptotic protein Ciapin1
Iron Sulfur biogenesis	YMR301C	ATM1	GCR* (<3, <1.03E-09)	DAmP	Essential	Strong (single hit)	This study	Mitochondrial inner membrane ATP-binding cassette (ABC) transporter, exports mitochondrially synthesized precursors of iron-sulfur (Fe/S) clusters to the cytosol
Oxidative Stress	YPL061W	ALD6	CTF	N/A	Non-essential	Weak (single hit)	[6]	Cytosolic aldehyde dehydrogenase, activated by Mg2+ and utilizes NADP+ as the preferred coenzyme; required for conversion of acetaldehyde to acetate; constitutively expressed; locates to the mitochondrial outer surface upon oxidative stress
Oxidative Stress	YML086C	ALO1	GCR	N/A	Non-essential	Strong (single hit)	[5]	D-Arabinono-1,4-lactone oxidase, catalyzes the final step in biosynthesis of dehydro-D-arabinono-1,4-lactone, which is protective against oxidative stress
Oxidative Stress	YNL080C	EOS1	BiM	N/A	Non-essential	Not Determined	[8	Protein involved in N-glycosylation; deletion mutation confers sensitivity to oxidative stress and shows synthetic lethality with mutations in the spindle checkpoint genes BUB3 and MAD1; YNL080C is not an essential gene
Oxidative Stress	YML028W	TSA1	BiM, ALF, GCR	N/A	Non-essential	Weak (multiple hit)	[5,6]	Thioredoxin peroxidase, acts as both a ribosome-associated and free cytoplasmic antioxidant; self-associates to form a high-molecular weight chaperone complex under oxidative stress; deletion results in mutator phenotype
Inheritance	YPR131C	NAT3	BiM	N/A	Non-essential	Not Determined	[8]	Catalytic subunit of the NatB N-terminal acetyltransferase, which catalyzes acetylation of the amino-terminal methionine residues of all proteins beginning with Met-Asp or Met-Glu and of some proteins beginning with Met-Asn or Met-Met
Fatty acid biogenesis	YBR026C	ETR1	BiM, ALF	N/A	Non-essential	Strong (multiple hit)	[6]	2-enoyl thioester reductase, member of the medium chain dehydrogenase/reductase family; localized to in mitochondria, where it has a probable role in fatty acid synthesis
Fatty acid biogenesis	YNR016C	ACC1	GCR* (15, 5.35E-09)	DAmP	Essential	Strong (single hit)	This study	Acetyl-CoA carboxylase, biotin containing enzyme that catalyzes the carboxylation of acetyl-CoA to form malonyl-CoA; required for de novo biosynthesis of long-chain fatty acids
Fatty acid biogenesis	YDL141W	BPL1	ALF	bpl1-ts	Essential	Weak (single hit)	This study	Biotin:apoprotein ligase, covalently modifies proteins with the addition of biotin, required for acetyl-CoA carboxylase (Acc1p) holoenzyme formation
Fatty acid biogenesis	YKL055C	OAR1	ALF	N/A	Non-essential	Weak (single hit)	[6]	Mitochondrial 3-oxoacyl-[acyl-carrier-protein] reductase, may comprise a type II mitochondrial fatty acid synthase along with Mct1p
Fatty acid biogenesis	YKL192C	ACP1	GCR	DAmP	Essential	Weak (single hit)	This study	Mitochondrial matrix acyl carrier protein, involved in biosynthesis of octanoate, which is a precursor to lipoic acid; activated by phosphopantetheinylation catalyzed by Ppt2p
Mitochondrial	YDR487C	RIB3	CTF, ALF	rib3-ts	Essential	Weak (multiple hit)	This study	3,4-dihydroxy-2-butanone-4-phosphate synthase (DHBP synthase), required for riboflavin biosynthesis from ribulose-5-phosphate, also has an unrelated function in mitochondrial respiration
Mitochondrial	YLR304C	ACO1	ALF	N/A	Non-essential	Strong (single hit)	[6]	Aconitase, required for the tricarboxylic acid (TCA) cycle and also independently required for mitochondrial genome maintenance; phosphorylated; component of the mitochondrial nucleoid; mutation leads to glutamate auxotrophy
Mitochondrial	YFL016C	MDJ1	ALF	N/A	Non-essential	Strong (single hit)	[6]	Co-chaperone that stimulates the ATPase activity of the HSP70 protein Ssc1p; involved in protein folding/refolding in the mitochodrial matrix; required for proteolysis of misfolded proteins; member of the HSP40 (DnaJ) family of chaperones
Mitochondrial	YIL125W	KGD1	ALF	N/A	Non-essential	Weak (single hit)	[6]	Component of the mitochondrial alpha-ketoglutarate dehydrogenase complex, which catalyzes a key step in the tricarboxylic acid (TCA) cycle, the oxidative decarboxylation of alpha-ketoglutarate to form succinyl-CoA
Mitochondrial	YDR194C	MSS116	ALF	N/A	Non-essential	Weak (single hit)	[6]	DEAD-box protein required for efficient splicing of mitochondrial Group I and II introns; non-polar RNA helicase that also facilities strand annealing
Mitochondrial	YPL271W	ATP15	BiM	N/A	Non-essential	Not Determined	[8]	Epsilon subunit of the F1 sector of mitochondrial F1F0 ATP synthase, which is a large, evolutionarily conserved enzyme complex required for ATP synthesis; phosphorylated
Mitochondrial	YOR241W	MET7	ALF	N/A	Non-essential	Strong (single hit)	[6]	Folylpolyglutamate synthetase, catalyzes extension of the glutamate chains of the folate coenzymes, required for methionine synthesis and for maintenance of mitochondrial DNA
Mitochondrial	YKR087C	OMA1	BiM, ALF	N/A	Non-essential	Strong (multiple hit)	[6]	Metalloendopeptidase of the mitochondrial inner membrane, involved in turnover of membrane-embedded proteins; member of a family of predicted membrane-bound metallopeptidases in prokaryotes and higher eukaryotes
Mitochondrial	YDR350C	ATP22	ALF	N/A	Non-essential	Weak (single hit)	[6]	Mitochondrial inner membrane protein required for assembly of the F0 sector of mitochondrial F1F0 ATP synthase, which is a large, evolutionarily conserved enzyme complex required for ATP synthesis
Mitochondrial	YHR194W	MDM31	ALF	N/A	Non-essential	Weak (single hit)	[6]	Mitochondrial inner membrane protein with similarity to Mdm32p, required for normal mitochondrial morphology and inheritance; interacts genetically with MMM1, MDM10, MDM12, and MDM34
Mitochondrial	YDR231C	COX20	ALF	N/A	Non-essential	Weak (single hit)	[6]	Mitochondrial inner membrane protein, required for proteolytic processing of Cox2p and its assembly into cytochrome c oxidase
Mitochondrial	YMR267W	PPA2	BiM	N/A	Non-essential	Not Determined	[8]	Mitochondrial inorganic pyrophosphatase, required for mitochondrial function and possibly involved in energy generation from inorganic pyrophosphate
Mitochondrial	YLR193C	UPS1	BiM, ALF	N/A	Non-essential	Weak (multiple hit)	[6]	Mitochondrial intermembrane space protein that regulates mitochondrial cardiolipin levels, null has defects in Mgm1p processing, integrity of mitochondrial inner membrane complexes, and mitochondrial morphology; ortholog of human PRELI
Mitochondrial	YOL009C	MDM12	BiM	N/A	Non-essential	Not Determined	[8]	Mitochondrial outer membrane protein, required for transmission of mitochondria to daughter cells; component of the Mdm10-Mdm12-Mmm1 complex involved in import and assembly of outer membrane beta-barrel proteins
Mitochondrial	YAL008W	FUN14	ALF	N/A	Non-essential	Weak (single hit)	[6]	Mitochondrial protein of unknown function
Mitochondrial	YMR066W	SOV1	ALF	N/A	Non-essential	Weak (single hit)	[6]	Mitochondrial protein of unknown function
Mitochondrial	YNR045W	PET494	ALF	N/A	Non-essential	Weak (single hit)	[6]	Mitochondrial translational activator specific for the COX3 mRNA, acts together with Pet54p and Pet122p; located in the mitochondrial inner membrane
Mitochondrial	YNL315C	ATP11	ALF	N/A	Non-essential	Weak (single hit)	[6]	Molecular chaperone, required for the assembly of alpha and beta subunits into the F1 sector of mitochondrial F1F0 ATP synthase
Mitochondrial	YJR144W	MGM101	ALF	N/A	Non-essential	Weak (single hit)	[6]	Protein involved in mitochondrial genome maintenance; component of the mitochondrial nucleoid, required for the repair of oxidative mtDNA damage
Mitochondrial	YOR060C	YOR060C	CTF, ALF	yor060c-ts	Essential	Strong (multiple hit)	This study	Protein of unknown function required for cell viability; deletion mutant harbors aberrant mitochondria
Mitochondrial	YNL213C	RRG9	ALF	N/A	Non-essential	Strong (single hit)	[6]	Protein of unknown function; null mutant lacks mitochondrial DNA and cannot grow on glycerol; the authentic, non-tagged protein is detected in highly purified mitochondria in high-throughput studies
Mitochondrial	YAL019W	FUN30	ALF	N/A	Non-essential	Weak (single hit)	[6]	Protein whose overexpression affects chromosome stability, potential Cdc28p substrate; homolog of Snf2p; the authentic, non-tagged protein is detected in highly purified mitochondria in high-throughput studies
Mitochondrial	YLR163C	MAS1	GCR	mas1-1	Essential	Not Determined	This study	Smaller subunit of the mitochondrial processing protease (MPP), essential processing enzyme that cleaves the N-terminal targeting sequences from mitochondrially imported proteins
Mitochondrial	YGR102C	YGR102C	ALF	N/A	Non-essential	Weak (single hit)	[6]	Subunit of the trimeric GatFAB AmidoTransferase(AdT) complex; involved in the formation of Q-tRNAQ; transposon insertion mutant is salt sensitive and null mutant has growth defects; non-tagged protein is detected in purified mitochondria
Mitochondrial	YHR001W-A	QCR10	ALF	N/A	Non-essential	Weak (single hit)	[6]	Subunit of the ubiqunol-cytochrome c oxidoreductase complex which includes Cobp, Rip1p, Cyt1p, Cor1p, Qcr2p, Qcr6p, Qcr7p, Qcr8p, Qcr9p, and Qcr10p and comprises part of the mitochondrial respiratory chain
Mitochondrial	YHR076W	PTC7	ALF	N/A	Non-essential	Weak (single hit)	[6]	Type 2C protein phosphatase; YHR076W is alternatively spliced to create two mRNA isoforms; protein from spliced form localizes to the mitochondria while the one from the unspliced form is localized to the nuclear envelope
RNA processing
Spliceosome	YPR082C	DIB1	CTFx2	dib1-ts, DAmP	Essential	Strong (multiple hit)	This study	17-kDa component of the U4/U6aU5 tri-snRNP, plays an essential role in pre-mRNA splicing, orthologue of hDIM1, the human U5-specific 15-kDa protein
Spliceosome	YLR298C	YHC1	CTF	yhc1-1	Essential	Weak (single hit)	This study	Component of the U1 snRNP complex required for pre-mRNA splicing; putative ortholog of human U1C protein, which is involved in formation of a complex between U1 snRNP and the pre-mRNA 5' splice site
Spliceosome	YOR308C	SNU66	CTF	N/A	Non-essential	Strong (single hit)	[6]	Component of the U4/U6.U5 snRNP complex involved in pre-mRNA splicing via spliceosome; has homology to human SART-1 and to an S. pombe protein; snu66 null mutation confers cold-sensitivity but is not lethal at normal growth temperatures
Spliceosome	YBL074C	AAR2	CTF	aar2-ts	Essential	Strong (single hit)	[3]	Component of the U5 snRNP, required for splicing of U3 precursors; originally described as a splicing factor specifically required for splicing pre-mRNA of the MATa1 cistron
Spliceosome	YIL061C	SNP1	CTF	snp1-ts	Essential	Strong (single hit)	This study	Component of U1 snRNP required for mRNA splicing via spliceosome; may interact with poly(A) polymerase to regulate polyadenylation; homolog of human U1 70K protein
Spliceosome	YPL213W	LEA1	ALF	N/A	Non-essential	Weak (single hit)	[6]	Component of U2 snRNP; disruption causes reduced U2 snRNP levels; physically interacts with Msl1p; invovled in telomere maintenance; putative homolog of human U2A' snRNP protein
Spliceosome	YDL098C	SNU23	ALF	snu23-ts	Essential	Not Determined	This study	Component of U4/U6.U5 snRNP involved in mRNA splicing via spliceosome
Spliceosome	YGR091W	PRP31	GCR	prp31-1	Essential	Not Determined	This study	Splicing factor, component of the U4/U6-U5 snRNP complex
Spliceosome	YPR178W	PRP4	GCR	prp4-1	Essential	Not Determined	This study	Splicing factor, component of the U4/U6-U5 snRNP complex
Spliceosome	YBR055C	PRP6	CTF	prp6-1	Essential	Weak (single hit)	This study	Splicing factor, component of the U4/U6-U5 snRNP complex
Spliceosome	YMR288W	HSH155	CTF	hsh155-ts	Essential	Weak (single hit)	[3]	U2-snRNP associated splicing factor that forms extensive associations with the branch site-3' splice site-3' exon region upon prespliceosome formation; similarity to the mammalian U2 snRNP-associated splicing factor SAP155
Spliceosome	YBR152W	SPP381	CTF	spp381-ts	Essential	Strong (single hit)	This study	mRNA splicing factor, component of U4/U6.U5 tri-snRNP; interacts genetically and physically with Prp38p
Spliceosome	YEL026W	SNU13	CTF	snu13-L67W	Essential	Weak (single hit)	This study	RNA binding protein, part of U3 snoRNP involved in rRNA processing, part of U4/U6-U5 tri-snRNP involved in mRNA splicing, similar to human 15.5K protein
Spliceosome	YDL209C	CWC2	CTF	cwc2-ts	Essential	Strong (single hit)	[3]	Member of the NineTeen Complex (NTC) that contains Prp19p and stabilizes U6 snRNA in catalytic forms of the spliceosome containing U2, U5, and U6 snRNAs; binds directly to U6 snRNA; similar to S. pombe Cwf2
Spliceosome	YDR416W	SYF1	CTF	syf1-ts	Essential	Strong (single hit)	This study	Member of the NineTeen Complex (NTC) that contains Prp19p and stabilizes U6 snRNA in catalytic forms of the spliceosome containing U2, U5, and U6 snRNAs; null mutant has splicing defect and arrests in G2/M; homologs in human and C. elegans
Spliceosome	YKL173W	SNU114	CTF, GCR	snu114-40, DAmP	Essential	Weak (multiple hit)	This study	GTPase component of U5 snRNP involved in mRNA splicing via spliceosome; binds directly to U5 snRNA; proposed to be involved in conformational changes of the spliceosome; similarity to ribosomal translocation factor EF-2
Spliceosome	YKL074C	MUD2	CTF	N/A	Non-essential	Strong (single hit)	[6]	Protein involved in early pre-mRNA splicing; component of the pre-mRNA-U1 snRNP complex, the commitment complex; interacts with Msl5p/BBP splicing factor and Sub2p; similar to metazoan splicing factor U2AF65
Cleavage and polyadenylation	YOR250C	CLP1	CTF	clp1-ts	Essential	Weak (single hit)	This study	Subunit of cleavage factor I (CFI), involved in both the endonucleolyitc cleavage and polyadenylation steps of mRNA 3'-end maturation
Cleavage and polyadenylation	YOL123W	HRP1	CTF	hrp1-4	Essential	Weak (single hit)	This study	Subunit of cleavage factor I, a five-subunit complex required for the cleavage and polyadenylation of pre-mRNA 3' ends; RRM-containing heteronuclear RNA binding protein and hnRNPA/B family member that binds to poly (A) signal sequences
Cleavage and polyadenylation	YGL044C	RNA15	CTF	rna15-58	Essential	Strong (single hit)	This study	Cleavage and polyadenylation factor I (CF I) component involved in cleavage and polyadenylation of mRNA 3' ends; interacts with the A-rich polyadenylation signal in complex with Rna14p and Hrp1p
Cleavage and polyadenylation	YOL115W	PAP2	BiM	N/A	Non-essential	Not Determined	[8]	Non-canonical poly(A) polymerase, involved in nuclear RNA degradation as a component of the TRAMP complex; catalyzes polyadenylation of hypomodified tRNAs, and snoRNA and rRNA precursors; overlapping but non-redundant functions with Trf5p
Cleavage and polyadenylation	YER165W	PAB1	CTF (overexpression)	N/A	Essential	Not Determined	[9]	Poly(A) binding protein, part of the 3'-end RNA-processing complex, mediates interactions between the 5' cap structure and the 3' mRNA poly(A) tail, involved in control of poly(A) tail length, interacts with translation factor eIF-4G
Cleavage and polyadenylation	YJR093C	FIP1	CTF	fip1-ts	Essential	Weak (single hit)	This study	Subunit of cleavage polyadenylation factor (CPF), interacts directly with poly(A) polymerase (Pap1p) to regulate its activity
Cleavage and polyadenylation	YLR115W	CFT2	GCR, CTF	cft2-ts, DAmP	Essential	Weak (multiple hit)	This study	Subunit of the mRNA cleavage and polyadenlylation factor (CPF); required for pre-mRNA cleavage, polyadenylation and poly(A) site recognition, 43% similarity with the mammalian CPSF-100 protein.
Cleavage and polyadenylation	YDR228C	PCF11	CTF x2	pcf11-ts10, pcf11-2	Essential	Strong (multiple hit)	This study	mRNA 3' end processing factor, essential component of cleavage and polyadenylation factor IA (CF IA), involved in pre-mRNA 3' end processing and in transcription termination; binds C-terminal domain of largest subunit of RNA pol II (Rpo21p)
Cleavage and polyadenylation	YNL317W	PFS2	CTF	DAmP	Essential	Strong (single hit)	This study	Integral subunit of the pre-mRNA cleavage and polyadenylation factor (CPF) complex; plays an essential role in mRNA 3'-end formation by bridging different processing factors and thereby promoting the assembly of the processing complex
Cleavage and polyadenylation	YGR156W	PTI1	CTF	pti1-ts7	Essential	Weak (multiple hit)	This study	Essential protein that is a component of CPF (cleavage and polyadenylation factor); involved in 3' end formation of snoRNA and mRNA; interacts directly with Pta1p; has similarity to mammalian Cleavage-Stimulation Factor CstF-64
mRNA decay	YGL173C	KEM1	BiM	N/A	Non-essential	Not Determined	[8]	Evolutionarily-conserved 5'-3' exonuclease component of cytoplasmic processing (P) bodies involved in mRNA decay; plays a role in microtubule-mediated processes, filamentous growth, ribosomal RNA maturation, and telomere maintenance
mRNA decay (LSM)	YJL124C	LSM1	CTF, BiM	N/A	Non-essential	Weak (multiple hit)	[6,8]	Lsm (Like Sm) protein; forms heteroheptameric complex (with Lsm2p, Lsm3p, Lsm4p, Lsm5p, Lsm6p, and Lsm7p) involved in degradation of cytoplasmic mRNAs
mRNA decay (LSM)	YBL026W	LSM2	CTF	lsm2-ts	Essential	Weak (single hit)	This study	Lsm (Like Sm) protein; part of heteroheptameric complexes (Lsm2p-7p and either Lsm1p or 8p): cytoplasmic Lsm1p complex involved in mRNA decay; nuclear Lsm8p complex part of U6 snRNP and possibly involved in processing tRNA, snoRNA, and rRNA
mRNA decay (LSM)	YDR378C	LSM6	CTFx2,BiMx2	N/A	Non-essential	Weak (multiple hit)	[6,8,11]	Lsm (Like Sm) protein; part of heteroheptameric complexes (Lsm2p-7p and either Lsm1p or 8p): cytoplasmic Lsm1p complex involved in mRNA decay; nuclear Lsm8p complex part of U6 snRNP and possibly involved in processing tRNA, snoRNA, and rRNA
Exosome	YOL021C	DIS3	CTF	dis3-ts	Essential	Weak (single hit)	This study	Exosome core complex catalytic subunit; possesses both endonuclease and 3'-5' exonuclease activity; involved in 3'-5' RNA processing and degradation in both the nucleus and the cytoplasm; has similarity to E. coli RNase R and to human DIS3
Exosome	YCR035C	RRP43	CTF	DAmP	Essential	Weak (single hit)	This study	Exosome non-catalytic core component; involved in 3'-5' RNA processing and degradation in both the nucleus and the cytoplasm; has similarity to E. coli RNase PH and to human hRrp43p (OIP2, EXOSC8)
Exosome	YHR069C	RRP4	CTF, GCR	rrp4-1	Essential	Strong (multiple hit)	This study	Exosome non-catalytic core component; involved in 3'-5' RNA processing and degradation in both the nucleus and the cytoplasm; predicted to contain RNA binding domains; has similarity to human hRrp4p (EXOSC2)
CCR4-NOT	YDL165W	CDC36	CTF	cdc36-16	Essential	Strong (single hit)	This study	Component of the CCR4-NOT complex, which has multiple roles in regulating mRNA levels including regulation of transcription and destabilizing mRNAs by deadenylation; basal transcription factor
CCR4-NOT	YCR093W	CDC39	CTF	cdc39-1	Essential	Weak (single hit)	This study	Component of the CCR4-NOT complex, which has multiple roles in regulating mRNA levels including regulation of transcription and destabilizing mRNAs by deadenylation; basal transcription factor
CCR4-NOT	YAL021C	CCR4	LOH	N/A	Non-essential	Strong (single hit)	[2]	Component of the CCR4-NOT transcriptional complex, which is involved in regulation of gene expression; component of the major cytoplasmic deadenylase, which is involved in mRNA poly(A) tail shortening
CCR4-NOT	YNR052C	POP2	LOH	N/A	Non-essential	Strong (single hit)	[2]	RNase of the DEDD superfamily, subunit of the Ccr4-Not complex that mediates 3' to 5' mRNA deadenylation
Splicing	YPL190C	NAB3	GCR	nab3-11	Essential	Not Determined	This study	Single stranded RNA binding protein; acidic ribonucleoprotein; required for termination of non-poly(A) transcripts and efficient splicing; interacts with Nrd1p
Splicing	YLR116W	MSL5	CTF	msl5-ts	Essential	Strong (single hit)	[3]	Component of the commitment complex, which defines the first step in the splicing pathway; essential protein that interacts with Mud2p and Prp40p, forming a bridge between the intron ends; also involved in nuclear retention of pre-mRNA
Splicing	YDL084W	SUB2	CTF	sub2-1	Essential	Strong (single hit)	This study	Component of the TREX complex required for nuclear mRNA export; member of the DEAD-box RNA helicase superfamily and is involved in early and late steps of spliceosome assembly; homolog of the human splicing factor hUAP56
RNA processing	YLR424W	SPP382	CTF	spp382-ts	Essential	Weak (single hit)	[3]	Essential protein that forms a dimer with Ntr2p; also forms a trimer, with Ntr2p and Prp43p, that is involved in spliceosome disassembly; found also in a multisubunit complex with the splicing factor Clf1p; suppressor of prp38-1 mutation
RNA processing	YPR042C	PUF2	ALF	N/A	Non-essential	Weak (single hit)	[6]	Member of the PUF protein family, which is defined by the presence of Pumilio homology domains that confer RNA binding activity; preferentially binds mRNAs encoding membrane-associated proteins
RNA processing	YHR087W	RTC3	ALF	N/A	Non-essential	Weak (single hit)	[6]	Protein of unknown function involved in RNA metabolism; has structural similarity to SBDS, the human protein mutated in Shwachman-Diamond Syndrome (the yeast SBDS ortholog = SDO1); null mutation suppresses cdc13-1 temperature sensitivity
RNA processing	YPL228W	CET1	CTF x2	cet1-2, cet1-15	Essential	Strong (multiple hit)	This study	Beta (RNA 5'-triphosphatase) subunit of the mRNA capping enzyme, a heterodimer (the other subunit is CEG1, a guanylyltransferase) involved in adding the 5' cap to mRNA; the mammalian enzyme is a single bifunctional polypeptide
RNA processing	YNL118C	DCP2	CTF	dcp2-7	Essential	Weak (single hit)	This study	Catalytic subunit of the Dcp1p-Dcp2p decapping enzyme complex, which removes the 5' cap structure from mRNAs prior to their degradation; member of the Nudix hydrolase family
Nucleocytoplasmic transport
Nuclear Pore component	YKL057C	NUP120	CTF,ALF	N/A	Non-essential	Strong (multiple hit)	[6]	Subunit of the Nup84p subcomplex of the nuclear pore complex (NPC), required for even distribution of NPCs around the nuclear envelope, involved in establishment of a normal nucleocytoplasmic concentration gradient of the GTPase Gsp1p
Nuclear Pore component	YKR082W	NUP133	CTF,ALF, LOH	N/A	Non-essential	Strong (multiple hit)	[2,6]	Subunit of the Nup84p subcomplex of the nuclear pore complex (NPC), localizes to both sides of the NPC, required to establish a normal nucleocytoplasmic concentration gradient of the GTPase Gsp1p
Nuclear Pore component	YAR002W	NUP60	ALF	N/A	Non-essential	Weak (single hit)	[6]	Subunit of the nuclear pore complex (NPC), functions to anchor Nup2p to the NPC in a process controlled by the nucleoplasmic concentration of Gsp1p-GTP; potential Cdc28p substrate; involved in telomere maintenance
Nuclear Pore component	YDL116W	NUP84	BiM, LOH	N/A	Non-essential	Weak (multiple hit)	[2,6]	Subunit of the nuclear pore complex (NPC), forms a subcomplex with Nup85p, Nup120p, Nup145p-C, Sec13p, and Seh1p that plays a role in nuclear mRNA export and NPC biogenesis
Nuclear Pore component	YBL079W	NUP170	CTF	N/A	Non-essential	Not Determined	[28]	Subunit of the nuclear pore complex (NPC), required for NPC localization of specific nucleoporins; involved in nuclear envelope permeability and chromosome segregation; has similar to Nup157p; essential role, with Nup157p, in NPC assembly
Nuclear Pore component	YJR042W	NUP85	CTF, ALF	nup85-ts	Essential	Weak (multiple hit)	This study	Subunit of the Nup84p subcomplex of the nuclear pore complex (NPC), required for assembly of the subcomplex and also for formation of the nucleocytoplasmic Gsp1p concentration gradient that plays a role in nuclear trafficking
Nuclear Pore component	YDR159W	SAC3	ALF	N/A	Non-essential	Weak (single hit)	[6]	Nuclear pore-associated protein, forms a complex with Thp1p that is involved in transcription and in mRNA export from the nucleus
Nuclear Pore component	YOL072W	THP1	BiM, ALF	N/A	Non-essential	Strong (multiple hit)	[6]	Nuclear pore-associated protein, forms a complex with Sac3p that is involved in transcription and in mRNA export from the nucleus; contains a PAM domain implicated in protein-protein binding
Nucleocytoplasmic transport	YER009W	NTF2	ALF	ntf2-ts	Essential	Not Determined	This study	Nuclear envelope protein, interacts with GDP-bound Gsp1p and with proteins of the nuclear pore to transport Gsp1p into the nucleus where it is an essential player in nucleocytoplasmic transport
Nucleocytoplasmic transport	YMR308C	PSE1	CTF, GCR	DAmP	Essential	Strong (multiple hit)	This study	Karyopherin/importin that interacts with the nuclear pore complex; acts as the nuclear import receptor for specific proteins, including Pdr1p, Yap1p, Ste12p, and Aft1p
Nucleocytoplasmic transport	YJR074W	MOG1	CTF	N/A	Non-essential	Weak (single hit)	[6]	Conserved nuclear protein that interacts with GTP-Gsp1p, which is a Ran homolog of the Ras GTPase family, and stimulates nucleotide release, involved in nuclear protein import, nucleotide release is inhibited by Yrb1p
Nucleocytoplasmic transport	YIR011C	STS1	CTF	sts1-ts	Essential	Weak (single hit)	[3]	Protein that interacts with the karyopherin Srp1p; may have a role with Srp1p in ubiquitin-mediated protein degradation
Nucleocytoplasmic transport	YLR293C	GSP1	CTF (overexpression)	N/A	Essential	Not Determined	[9]	Ran GTPase, GTP binding protein (mammalian Ranp homolog) involved in the maintenance of nuclear organization, RNA processing and transport; regulated by Srm1p, Rna1p, Yrb1p, Yrb2p, Yrp4p, Yrb30p, Cse1p and Kap95p; yeast Gsp2p homolog
Nucleocytoplasmic transport	YHR036W	BRL1	CTF x2, GCR	brl1-2221, brl1-3231	Essential	Strong (multiple hit)	This study	Essential nuclear envelope integral membrane protein identified as a suppressor of a conditional mutation in the major karyopherin, CRM1; homologous to and interacts with Brr6p, a nuclear envelope protein involved in nuclear export
Nucleocytoplasmic transport	YMR235C	RNA1	CTF (overexpression), GCR	rna1-1	Essential	Weak (multiple hit)	[9] and this study	GTPase activating protein (GAP) for Gsp1p, involved in nuclear transport
Nucleocytoplasmic transport	YGL238W	CSE1	CTF	cse4-1	Essential	Strong (multiple hit)	This study	Nuclear envelope protein that mediates the nuclear export of importin alpha (Srp1p), homolog of metazoan CAS protein, required for accurate chromosome segregation
Nucleocytoplasmic transport	YDR002W	YRB1	CTF (overexpression)	N/A	Essential	Not Determined	[9]	Ran GTPase binding protein; involved in nuclear protein import and RNA export, ubiquitin-mediated protein degradation during the cell cycle; shuttles between the nucleus and cytoplasm; is essential; homolog of human RanBP1
Nucleocytoplasmic transport	YGL097W	SRM1	CTF	srm1-ts	Essential	Strong (single hit)	This study	Nucleotide exchange factor for Gsp1p, localizes to the nucleus, required for nucleocytoplasmic trafficking of macromolecules; suppressor of the pheromone response pathway; potentially phosphorylated by Cdc28p
Nucleocytoplasmic transport	YGR218W	CRM1	GCR	crm1-1	Essential	Not Determined	This study	Major karyopherin, involved in export of proteins, RNAs, and ribosomal subunits from the nucleus; exportin
Nucleocytoplasmic transport	YPL125W	KAP120	BiM	N/A	Non-essential	Weak (single hit)	[6]	Karyopherin responsible for the nuclear import of ribosome maturation factor Rfp1p
Nucleocytoplasmic transport	YOR160W	MTR10	CTF	mtr10-ts	Essential	Weak (single hit)	This study	Nuclear import receptor, mediates the nuclear localization of proteins involved in mRNA-nucleus export; promotes dissociation of mRNAs from the nucleus-cytoplasm mRNA shuttling protein Npl3p
Endomembrane system
Signal recognition particle	YDR292C	SRP101	CTF	srp101-47	Essential	Strong (single hit)	This study	Signal recognition particle (SRP) receptor - alpha subunit; contain GTPase domains; involved in SRP-dependent protein targeting; interacts with Srp102p
Signal recognition particle	YKL154W	SRP102	CTF	srp102-510	Essential	Weak (single hit)	This study	Signal recognition particle (SRP) receptor beta subunit; involved in SRP-dependent protein targeting; anchors Srp101p to the ER membrane
Signal recognition particle	YPR088C	SRP54	ALF	srp54-ts	Essential	Not Determined	This study	Signal recognition particle (SRP) subunit (homolog of mammalian SRP54); contains the signal sequence-binding activity of SRP, interacts with the SRP RNA, and mediates binding of SRP to signal receptor; contains GTPase domain
Signal recognition particle	YLR378C	SEC61	CTF	DAmP	Essential	Weak (single hit)	This study	Essential subunit of Sec61 complex (Sec61p, Sbh1p, and Sss1p); forms a channel for SRP-dependent protein import and retrograde transport of misfolded proteins out of the ER; with Sec63 complex allows SRP-independent protein import into ER
Secretion (ER-to-Golgi)	YJL031C	BET4	CTF	bet4-ts	Essential	Strong (single hit)	This study	Alpha subunit of Type II geranylgeranyltransferase required for vesicular transport between the endoplasmic reticulum and the Golgi; provides a membrane attachment moiety to Rab-like proteins Ypt1p and Sec4p
Secretion (ER-to-Golgi)	YML077W	BET5	CTF	bet5-ts	Essential	Weak (single hit)	This study	Component of the TRAPP (transport protein particle) complex, which plays an essential role in the vesicular transport from endoplasmic reticulum to Golgi
Secretion (ER-to-Golgi)	YNR026C	SEC12	CTF, GCR	sec12-4	Essential	Weak (multiple hit)	This study	Guanine nucleotide exchange factor (GEF); glycosylated integral membrane protein of the endoplasmic reticulum, important for the initiation of transport vesicle budding from the endoplasmic reticulum through activation of the GTPase Sar1p
Secretion (ER-to-Golgi)	YBL050W	SEC17	CTF	sec17-1	Essential	Strong (single hit)	This study	Peripheral membrane protein required for vesicular transport between ER and Golgi and for the 'priming' step in homotypic vacuole fusion, part of the cis-SNARE complex; has similarity to alpha-SNAP
Secretion (ER-to-Golgi)	YDR170C	SEC7	GCR	sec7-1	Essential	Not Determined	This study	Guanine nucleotide exchange factor (GEF) for ADP ribosylation factors involved in proliferation of the Golgi, intra-Golgi transport and ER-to-Golgi transport; found in the cytoplasm and on Golgi-associated coated vesicles
Secretion (ER-to-Golgi)	YIL109C	SEC24	GCR	sec24-2	Essential	Not Determined	This study	Component of the Sec23p-Sec24p heterodimeric complex of the COPII vesicle coat; involved in ER to Golgi transport, cargo selection and autophagy; required for the binding of the Sec13 complex to ER membranes; homologous to Lst1p and Lss1p
Secretion (ER-to-Golgi)	YDR189W	SLY1	CTF	sly1-ts	Essential	Strong (single hit)	This study	Hydrophilic protein involved in vesicle trafficking between the ER and Golgi; SM (Sec1/Munc-18) family protein that binds the tSNARE Sed5p and stimulates its assembly into a trans-SNARE membrane-protein complex
Secretion (ER-to-Golgi)	YMR218C	TRS130	CTF	trs130-ts	Essential	Strong (single hit)	[3]	One of 10 subunits of the transport protein particle (TRAPP) complex of the cis-Golgi which mediates vesicle docking and fusion; involved in ER to Golgi membrane traffic; mutation activates transcription of OCH1
Secretion (ER-to-Golgi)	YDR246W	TRS23	CTF, BiM, ALF	trs23-ts	Essential	Weak (multiple hit)	[1]	One of 10 subunits of the transport protein particle (TRAPP) complex of the cis-Golgi which mediates vesicle docking and fusion; involved in endoplasmic reticulum (ER) to Golgi membrane traffic; human homolog is TRAPPC4
Secretion (ER-to-Golgi)	YFL038C	YPT1	CTF	DAmP	Essential	Weak (single hit)	This study	Rab family small GTPase, involved in the ER-to-Golgi step of the secretory pathway; complex formation with the Rab escort protein Mrs6p is required for prenylation of Ypt1p by protein geranylgeranyltransferase type II (Bet2p-Bet4p)
Secretion (ER-to-Golgi)	YGR172C	YIP1	CTF	yip1-4	Essential	Strong (single hit)	This study	Integral membrane protein required for the biogenesis of ER-derived COPII transport vesicles; interacts with Yif1p and Yos1p; localizes to the Golgi, the ER, and COPII vesicles
Secretion (ER-to-Golgi)	YIL004C	BET1	CTF	bet1-1	Essential	Strong (single hit)	This study	Type II membrane protein required for vesicular transport between the endoplasmic reticulum and Golgi complex; v-SNARE with similarity to synaptobrevins
Secretion	YMR079W	SEC14	GCR	sec14-3	Essential	Not Determined	This study	Phosphatidylinositol/phosphatidylcholine transfer protein; involved in regulating PtdIns, PtdCho, and ceramide metabolism, products of which regulate intracellular transport and UPR; functionally homologous to mammalian PITPs
Secretion	YNR049C	MSO1	ALF	N/A	Non-essential	Weak (single hit)	[6]	Probable component of the secretory vesicle docking complex, acts at a late step in secretion; shows genetic and physical interactions with Sec1p; required for prospore membrane formation during sporulation
Secretion	YLR440C	SEC39	CTF, GCR	sec39-2	Essential	Weak (multiple hit)	This study	Component of the Dsl1p tethering complex that interacts with ER SNAREs Sec20p and Use1p; proposed to be involved in protein secretion; localizes to the ER and nuclear envelope
Secretion	YOR326W	MYO2	CTF	myo2-16	Essential	Weak (single hit)	This study	One of two type V myosin motors (along with MYO4) involved in actin-based transport of cargos; required for the polarized delivery of secretory vesicles, the vacuole, late Golgi elements, peroxisomes, and the mitotic spindle
Secretion	YCR067C	SED4	ALF	N/A	Non-essential	Weak (single hit)	[6]	Integral endoplasmic reticulum membrane protein, functions as a positive regulator of Sar1p probably through inhibition of GTPase activation by Sec23p; binds Sec16p, participates in vesicle formation, similar to Sec12p
Secretion	YPR032W	SRO7	BiM, ALF	N/A	Non-essential	Weak (multiple hit)	[6]	Effector of Rab GTPase Sec4p, forms a complex with Sec4p and t-SNARE Sec9p; involved in exocytosis and docking and fusion of post-Golgi vesicles with plasma membrane; homolog of Sro77p and Drosophila lgl tumor suppressor
Trafficking	YFR051C	RET2	CTF, GCR	ret2-1	Essential	Strong (multiple hit)	This study	Delta subunit of the coatomer complex (COPI), which coats Golgi-derived transport vesicles; involved in retrograde transport between Golgi and ER
Trafficking	YGL098W	USE1	CTF	use1-ts	Essential	Weak (single hit)	This study	Essential SNARE protein localized to the ER, involved in retrograde traffic from the Golgi to the ER; forms a complex with the SNAREs Sec22p, Sec20p and Ufe1p
Trafficking	YJR005W	APL1	BiM	N/A	Non-essential	Not Determined	[8]	Beta-adaptin, large subunit of the clathrin associated protein complex (AP-2); involved in vesicle mediated transport; similar to mammalian beta-chain of the clathrin associated protein complex
Trafficking	YMR197C	VTI1	CTF	vti1-2	Essential	Weak (single hit)	This study	Protein involved in cis-Golgi membrane traffic; v-SNARE that interacts with two t-SNARES, Sed5p and Pep12p; required for multiple vacuolar sorting pathways
Trafficking	YNR048W	YNR048W	ALF	N/A	Non-essential	Weak (single hit)	[6]	Protein that interacts specifically in vivo with phospholipid translocase (flippase) Dnf3p; similar to Cdc50p, which is an essential interaction partner of the flippase Drs2p
Trafficking	YCR094W	CDC50	GCR	N/A	Non-essential	Strong (single hit)	[5]	Endosomal protein that interacts with phospholipid flippase Drs2p; interaction with Cdc50p is essential for Drs2p catalytic activity; mutations affect cell polarity and polarized growth; similar to Ynr048wp and Lem3p
ER	YML130C	ERO1	CTF	ero1-1	Essential	Strong (single hit)	This study	Thiol oxidase required for oxidative protein folding in the endoplasmic reticulum
ER	YIL090W	ICE2	LOH	N/A	Non-essential	Strong (single hit)	[2]	Integral ER membrane protein with type-III transmembrane domains; mutations cause defects in cortical ER morphology in both the mother and daughter cells
ER	YNL291C	MID1	BiM	N/A	Non-essential	Weak (single hit)	[6]	N-glycosylated integral membrane protein of the ER membrane and plasma membrane, functions as a stretch-activated Ca2+-permeable cation channel required for Ca2+ influx stimulated by pheromone; interacts with Cch1p; forms an oligomer
Vacuole, autophagy	YLR423C	ATG17	LOH	N/A	Non-essential	Weak (single hit)	[2]	Scaffold protein responsible for phagophore assembly site organization; regulatory subunit of an autophagy-specific complex that includes Atg1p and Atg13p; stimulates Atg1p kinase activity
Vacuole, autophagy	YEL013W	VAC8	ALF	N/A	Non-essential	Weak (single hit)	[6]	Phosphorylated and palmitoylated vacuolar membrane protein that interacts with Atg13p, required for the cytoplasm-to-vacuole targeting (Cvt) pathway; interacts with Nvj1p to form nucleus-vacuole junctions
Vacuole, autophagy	YLR373C	VID22	BiM, ALF	N/A	Non-essential	Strong (multiple hit)	[6]	Glycosylated integral membrane protein localized to the plasma membrane; plays a role in fructose-1,6-bisphosphatase (FBPase) degradation; involved in FBPase transport from the cytosol to Vid (vacuole import and degradation) vesicles
Vacuole, autophagy	YGR141W	VPS62	ALF	N/A	Non-essential	Weak (single hit)	[6]	Vacuolar protein sorting (VPS) protein required for cytoplasm to vacuole targeting of proteins
Vacuole, autophagy	YDR200C	VPS64	CTF	N/A	Non-essential	Strong (single hit)	[6]	Protein required for cytoplasm to vacuole targeting of proteins; forms a complex with Far3p and Far7p to Far11p involved in recovery from pheromone-induced cell cycle arrest; localizes to the cytoplasm and endoplasmic reticulum membrane
Lipid Synthesis	YBR042C	CST26	CTF (overexpression)	N/A	Non-essential	Not Determined	[9]	Protein required for incorporation of stearic acid into phosphatidylinositol; affects chromosome stability when overexpressed
Lipid Synthesis	YPL117C	IDI1	ALF	idi1-ts	Essential	Not Determined	This study	Isopentenyl diphosphate:dimethylallyl diphosphate isomerase (IPP isomerase), catalyzes an essential activation step in the isoprenoid biosynthetic pathway; required for viability
Lipid Synthesis	YHR133C	NSG1	ALF	N/A	Non-essential	Strong (single hit)	[6]	Protein involved in regulation of sterol biosynthesis; specifically stabilizes Hmg2p, one of two HMG-CoA isoenzymes that catalyze the rate-limiting step in sterol biosynthesis; homolog of mammalian INSIG proteins
Lipid Synthesis	YMR008C	PLB1	ALF	N/A	Non-essential	Weak (single hit)	[6]	Phospholipase B (lysophospholipase) involved in lipid metabolism, required for deacylation of phosphatidylcholine and phosphatidylethanolamine but not phosphatidylinositol
Lipid Synthesis	YJL167W	ERG20	CTF	erg20-ts	Essential	Weak (single hit)	This study	Farnesyl pyrophosphate synthetase, has both dimethylallyltranstransferase and geranyltranstransferase activities; catalyzes the formation of C15 farnesyl pyrophosphate units for isoprenoid and sterol biosynthesis
	YDR182W	CDC1	CTF	cdc1-4	Essential	Weak (single hit)	This study	Putative lipid phosphatase of the endoplasmic reticulum; shows Mn2+ dependence and may affect Ca2+ signaling; mutants display actin and general growth defects and pleiotropic defects in cell cycle progression and organelle distribution
	YBR109C	CMD1	CTF x2	cmd1-1, cmd1-3	Essential	Strong (multiple hit)	This study	Calmodulin; Ca++ binding protein that regulates Ca++ independent processes (mitosis, bud growth, actin organization, endocytosis, etc.) and Ca++ dependent processes (stress-activated pathways), targets include Nuf1p, Myo2p and calcineurin
	YDR017C	KCS1	BiM	N/A	Non-essential	Not Determined	[8]	Inositol hexakisphosphate (IP6) and inositol heptakisphosphate (IP7) kinase; generation of high energy inositol pyrophosphates by Kcs1p is required for many processes such as vacuolar biogenesis, stress response and telomere maintenance
	YLR410W	VIP1	BiM	N/A	Non-essential	Not Determined	[8]	Inositol hexakisphosphate (IP6) and inositol heptakisphosphate (IP7) kinase; generation of IP7 by Vip1p is important for phosphate signaling; likely involved in cortical actin cytoskeleton function, by analogy with S. pombe ortholog asp1
	YPL268W	PLC1	Chromosome loss (disomic Chr III)	N/A	Non-essential	Not Determined	[29]	Phospholipase C, hydrolyzes phosphatidylinositol 4,5-biphosphate (PIP2) to generate the signaling molecules inositol 1,4,5-triphosphate (IP3) and 1,2-diacylglycerol (DAG); involved in regulating many cellular processes
	YER177W	BMH1	GCR	N/A	Non-essential	Weak (single hit)	[30]	14-3-3 protein, major isoform; controls proteome at post-transcriptional level, binds proteins and DNA, involved in regulation of many processes including exocytosis, vesicle transport, Ras/MAPK signaling, and rapamycin-sensitive signaling
	YDR099W	BMH2	GCR	N/A	Non-essential	Weak (single hit)	[30]	14-3-3 protein, minor isoform; controls proteome at post-transcriptional level, binds proteins and DNA, involved in regulation of many processes including exocytosis, vesicle transport, Ras/MAPK signaling, and rapamycin-sensitive signaling
Morphogenesis and cell integrity
Actin cytoskeleton	YFL039C	ACT1	CTF, GCR	act1-119	Essential	Strong (multiple hit)	This study	Actin, structural protein involved in cell polarization, endocytosis, and other cytoskeletal functions
Actin cytoskeleton	YLR370C	ARC18	ALF, BiM	N/A	Non-essential	Weak (multiple hit)	[6,8]	Subunit of the ARP2/3 complex, which is required for the motility and integrity of cortical actin patches
Actin cytoskeleton	YKL013C	ARC19	CTF	arc19-ts	Essential	Weak (single hit)	This study	Subunit of the ARP2/3 complex, which is required for the motility and integrity of cortical actin patches
Actin cytoskeleton	YLR085C	ARP6	BiM	N/A	Non-essential	Weak (single hit)	[6]	Actin-related protein that binds nucleosomes; a component of the SWR1 complex, which exchanges histone variant H2AZ (Htz1p) for chromatin-bound histone H2A
Actin cytoskeleton	YOR122C	PFY1	CTF, GCR	pfy1-14	Essential	Weak (multiple hit)	This study	Profilin, actin- and phosphatidylinositol 4,5-bisphosphate-binding protein, involved in cytoskeleton organization, required for normal timing of actin polymerization in response to thermal stress; localizes to plasma membrane and cytosol
Actin cytoskeleton	YLR429W	CRN1	BiM	N/A	Non-essential	Not Determined	[8]	Coronin, cortical actin cytoskeletal component that associates with the Arp2p/Arp3p complex to regulate its activity; plays a role in regulation of actin patch assembly
Actin cytoskeleton	YNL138W	SRV2	CTF	srv2-ts	Essential	Weak (single hit)	This study	CAP (cyclase-associated protein) subunit of adenylyl cyclase complex; N-terminus binds adenylyl cyclase and facilitates activation by RAS; C-terminus binds ADP-actin monomers, facilitating regulation of actin dynamics and cell morphogenesis
Actin cytoskeleton	YLL050C	COF1	GCR	cof1-5	Essential	Not Determined	This study	Cofilin, promotes actin filament depolarization in a pH-dependent manner; binds both actin monomers and filaments and severs filaments; thought to be regulated by phosphorylation at SER4; ubiquitous and essential in eukaryotes
Actin cytoskeleton	YLR229C	CDC42	GCR	cdc42-1	Essential	Not Determined	This study	Small rho-like GTPase, essential for establishment and maintenance of cell polarity; mutants have defects in the organization of actin and septins
Actin cytoskeleton	YAL041W	CDC24	GCR	cdc24-11	Essential	Not Determined	This study	Guanine nucleotide exchange factor (GEF or GDP-release factor) for Cdc42p; required for polarity establishment and maintenance, and mutants have morphological defects in bud formation and shmooing
Actin cytoskeleton	YDR208W	MSS4	GCR	mss4-102	Essential	Not Determined	This study	Phosphatidylinositol-4-phosphate 5-kinase, involved in actin cytoskeleton organization and cell morphogenesis; multicopy suppressor of stt4 mutation
Actin cytoskeleton	YJL058C	BIT61	BiM	N/A	Non-essential	Not Determined	[8]	Subunit of TORC2 (Tor2p-Lst8p-Avo1-Avo2-Tsc11p-Bit61p-Slm1p-Slm2p), a membrane-associated complex that regulates cell cycle-dependent actin cytoskeletal dynamics during polarized growth and cell wall integrity
Actin cytoskeleton	YNL047C	SLM2	ALF	N/A	Non-essential	Weak (single hit)	[6]	Phosphoinositide PI4,5P(2) binding protein, forms a complex with Slm1p; acts downstream of Mss4p in a pathway regulating actin cytoskeleton organization in response to stress; phosphorylated by the TORC2 complex
Cytokinesis	YML064C	TEM1	GCR	tem1-3	Essential	Not Determined	This study	GTP-binding protein of the ras superfamily involved in termination of M-phase; controls actomyosin and septin dynamics during cytokinesis
Cytokinesis	YNL152W	INN1	CTF, BiM, ALF	inn1-ts	Essential	Strong (multiple hit)	[1]	Essential protein that associates with the contractile actomyosin ring, required for ingression of the plasma membrane into the bud neck during cytokinesis; C2 domain, a membrane targeting module, is required for function
Cytokinesis	YHR107C	CDC12	CTF	cdc12-td	Essential	Weak (single hit)	This study	Component of the septin ring of the mother-bud neck that is required for cytokinesis; septins recruit proteins to the neck and can act as a barrier to diffusion at the membrane, and they comprise the 10nm filaments seen with EM
Cytokinesis	YDL117W	CYK3	BiM, ALF	N/A	Non-essential	Weak (multiple hit)	[6]	SH3-domain protein located in the mother-bud neck and the cytokinetic actin ring; mutant phenotype and genetic interactions suggest a role in cytokinesis
Cytokinesis	YGR058W	PEF1	BiM	N/A	Non-essential	Weak (single hit)	[6]	Penta-EF-hand protein required for polar bud growth and cell wall abscission; binds calcium and zinc with different affinity; localizes to bud site in G1, bud neck in G2
Cytokinesis	YNL066W	SUN4	ALF	N/A	Non-essential	Weak (single hit)	[6]	Cell wall protein related to glucanases, possibly involved in cell wall septation; member of the SUN family
Cell wall (GPI anchor biogenesis)	YGL142C	GPI10	CTF	gpi10-ts	Essential	Weak (single hit)	[3]	Integral membrane protein involved in glycosylphosphatidylinositol (GPI) anchor synthesis; putative alpha 1,2 mannosyltransferase required for addition of the third mannose onto the GPI core structure; human PIG-Bp is a functional homolog
Cell wall (GPI anchor biogenesis)	YDR434W	GPI17	CTF	gpi17-ts	Essential	Strong (single hit)	[3]	Transmembrane protein subunit of the glycosylphosphatidylinositol transamidase complex that adds GPIs to newly synthesized proteins; human PIG-Sp homolog
Cell wall (GPI anchor biogenesis)	YOR149C	SMP3	GCR	smp3-1	Essential	Not Determined	This study	Alpha 1,2-mannosyltransferase involved in glycosyl phosphatidyl inositol (GPI) biosynthesis; required for addition of the fourth, side branching mannose to the GPI core structure
Cell wall (GPI anchor biogenesis)	YLR459W	GAB1	CTF x2	gab1-1, gab1-2	Essential	Weak (multiple hit)	This study	GPI transamidase subunit, involved in attachment of glycosylphosphatidylinositol (GPI) anchors to proteins; may have a role in recognition of the attachment signal or of the lipid portion of GPI
Cell wall (GPI anchor biogenesis)	YDL103C	QRI1	GCR	qri1-ts1	Essential	Not Determined	This study	UDP-N-acetylglucosamine pyrophosphorylase, catalyzes the formation of UDP-N-acetylglucosamine (UDP-GlcNAc), which is important in cell wall biosynthesis, protein N-glycosylation, and GPI anchor biosynthesis
Cell wall (GPI anchor biogenesis)	YLR242C	ARV1	BiM	N/A	Non-essential	Weak (single hit)	[6]	Protein functioning in transport of glycosylphosphatidylinositol intermediates into the ER lumen; required for normal intracellular sterol distribution and for sphingolipid metabolism; similar to Nup120p and C. elegans R05H5.5 protein
Cell wall (GPI anchor biogenesis)	YCL052C	PBN1	CTF	pbn1-ts	Essential	Strong (single hit)	[3]	Essential component of glycosylphosphatidylinositol-mannosyltransferase I, required for the autocatalytic post-translational processing of the protease B precursor Prb1p, localizes to ER in lumenal orientation; homolog of mammalian PIG-X
Cell wall	YIR019C	MUC1	ALF	N/A	Non-essential	Strong (single hit)	[6]	GPI-anchored cell surface glycoprotein (flocculin) required for pseudohyphal formation, invasive growth, flocculation, and biofilms; transcriptionally regulated by the MAPK pathway (via Ste12p and Tec1p) and the cAMP pathway (via Flo8p)
Cell wall	YOR002W	ALG6	BiM	N/A	Non-essential	Not Determined	[8]	Alpha 1,3 glucosyltransferase, involved in transfer of oligosaccharides from dolichyl pyrophosphate to asparagine residues of proteins during N-linked protein glycosylation; mutations in human ortholog are associated with disease
Cell wall	YKL104C	GFA1	CTF	gfa1-97	Essential	Weak (single hit)	This study	Glutamine-fructose-6-phosphate amidotransferase, catalyzes the formation of glucosamine-6-P and glutamate from fructose-6-P and glutamine in the first step of chitin biosynthesis
Cell wall	YFR042W	KEG1	CTF, BiM, ALF	keg1-ts	Essential	Strong (multiple hit)	[1] and this study	Integral membrane protein of the ER; physically interacts with Kre6p; has a role in the synthesis of beta-1,6-glucan in the cell wall; required for cell viability
Cell wall	YHR204W	MNL1	ALF	N/A	Non-essential	Weak (single hit)	[6]	Alpha mannosidase-like protein of the endoplasmic reticulum required for degradation of glycoproteins but not for processing of N-linked oligosaccharides
Cell wall	YHR101C	BIG1	CTF	big1-ts	Essential	Strong (single hit)	[3]	Integral membrane protein of the endoplasmic reticulum, required for normal content of cell wall beta-1,6-glucan
Cell wall	YLR443W	ECM7	ALF	N/A	Non-essential	Weak (single hit)	[6]	Non-essential putative integral membrane protein; mutant has cell wall defects; transcription is induced under conditions of zinc deficiency
Cell wall	YOR336W	KRE5	GCR	kre5-ts2	Essential	Not Determined	This study	Protein required for beta-1,6 glucan biosynthesis; mutations result in aberrant morphology and severe growth defects
Cell wall	YBL105C	PKC1	CTF x2	pkc1-1, pkc1-4	Essential	Weak (multiple hit)	This study	Protein serine/threonine kinase essential for cell wall remodeling during growth; localized to sites of polarized growth and the mother-daughter bud neck; homolog of the alpha, beta, and gamma isoforms of mammalian protein kinase C (PKC)
Cell wall	YKL035W	UGP1	CTF	ugp1-ts	Essential	Strong (single hit)	[3]	UDP-glucose pyrophosphorylase (UGPase), catalyses the reversible formation of UDP-Glc from glucose 1-phosphate and UTP, involved in a wide variety of metabolic pathways, expression modulated by Pho85p through Pho4p
Cell integrity	YOL081W	IRA2	LOH	N/A	Non-essential	Weak (single hit)	[2]	GTPase-activating protein that negatively regulates RAS by converting it from the GTP- to the GDP-bound inactive form, required for reducing cAMP levels under nutrient limiting conditions, has similarity to Ira1p and human neurofibromin
Cell integrity	YGR014W	MSB2	BiM	N/A	Non-essential	Weak (single hit)	[6]	Mucin family member involved in the Cdc42p- and MAP kinase-dependent filamentous growth signaling pathway; also functions as an osmosensor in parallel to the Sho1p-mediated pathway; potential Cdc28p substrate
Cell integrity	YLR006C	SSK1	CTF	N/A	Non-essential	Strong (single hit)	[6]	Cytoplasmic response regulator, part of a two-component signal transducer that mediates osmosensing via a phosphorelay mechanism; dephosphorylated form is degraded by the ubiquitin-proteasome system; potential Cdc28p substrate
Cell integrity	YLR425W	TUS1	ALF	N/A	Non-essential	Weak (single hit)	[6]	Guanine nucleotide exchange factor (GEF) that functions to modulate Rho1p activity as part of the cell integrity signaling pathway; multicopy suppressor of tor2 mutation and ypk1 ypk2 double mutation; potential Cdc28p substrate
Other housekeeping pathways
Vitamin synthesis or Salvage	YJL060W	BNA3	BiM	N/A	Non-essential	Not Determined	[8]	Kynurenine aminotransferase, catalyzes formation of kynurenic acid from kynurenine; potential Cdc28p substrate
Vitamin synthesis or Salvage	YEL029C	BUD16	GCR	N/A	Non-essential	Strong (single hit)	[4]	Putative pyridoxal kinase, a key enzyme involved in pyridoxal 5'-phosphate synthesis, the active form of vitamin B6; required for genome integrity; involved in bud-site selection; similarity to yeast BUD17 and human pyridoxal kinase (PDXK)
Vitamin synthesis or Salvage	YBR035C	PDX3	GCR	N/A	Non-essential	Weak (single hit)	[4]	Pyridoxine (pyridoxamine) phosphate oxidase, has homologs in E. coli and Myxococcus xanthus; transcription is under the general control of nitrogen metabolism
Vitamin synthesis or Salvage	YDL045C	FAD1	ALF	fad1-ts	Essential	Not Determined	This study	Flavin adenine dinucleotide (FAD) synthetase, performs the second step in synthesis of FAD from riboflavin
Vitamin synthesis or Salvage	YCR028C	FEN2	LOH	N/A	Non-essential	Strong (single hit)	[2]	Plasma membrane H+-pantothenate symporter; confers sensitivity to the antifungal agent fenpropimorph
Vitamin synthesis or Salvage	YGR267C	FOL2	GCR	DAmP	Essential	Strong (single hit)	This study	GTP-cyclohydrolase I, catalyzes the first step in the folic acid biosynthetic pathway
Amino Acid synthesis or salvage	YLR058C	SHM2	BiMx2, ALF	N/A	Non-essential	Strong (multiple hit)	[6,8]	Cytosolic serine hydroxymethyltransferase, converts serine to glycine plus 5,10 methylenetetrahydrofolate; major isoform involved in generating precursors for purine, pyrimidine, amino acid, and lipid biosynthesis
Amino Acid synthesis or salvage	YEL046C	GLY1	LOH	N/A	Non-essential	Strong (single hit)	[2]	Threonine aldolase, catalyzes the cleavage of L-allo-threonine and L-threonine to glycine; involved in glycine biosynthesis
Amino Acid synthesis or salvage	YKL221W	MCH2	ALF	N/A	Non-essential	Weak (single hit)	[6]	Protein with similarity to mammalian monocarboxylate permeases, which are involved in transport of monocarboxylic acids across the plasma membrane; mutant is not deficient in monocarboxylate transport
Amino Acid synthesis or salvage	YOL064C	MET22	BiM, CTF	N/A	Non-essential	Weak (multiple hit)	[6,11]	Bisphosphate-3'-nucleotidase, involved in salt tolerance and methionine biogenesis; dephosphorylates 3'-phosphoadenosine-5'-phosphate and 3'-phosphoadenosine-5'-phosphosulfate, intermediates of the sulfate assimilation pathway
Amino Acid synthesis or salvage	YER023W	PRO3	CTF, ALF	pro3-ts	Essential	Strong (multiple hit)	[3] and this study	Delta 1-pyrroline-5-carboxylate reductase, catalyzes the last step in proline biosynthesis
Amino Acid synthesis or salvage	YKR093W	PTR2	ALF	N/A	Non-essential	Weak (single hit)	[6]	Integral membrane peptide transporter, mediates transport of di- and tri-peptides; conserved protein that contains 12 transmembrane domains; PTR2 expression is regulated by the N-end rule pathway via repression by Cup9p
Carbon uptake and utilization	YCR012W	PGK1	GCR	DAmP	Essential	Strong (single hit)	This study	3-phosphoglycerate kinase, catalyzes transfer of high-energy phosphoryl groups from the acyl phosphate of 1,3-bisphosphoglycerate to ADP to produce ATP; key enzyme in glycolysis and gluconeogenesis
Carbon uptake and utilization	YHR092C	HXT4	ALF	N/A	Non-essential	Weak (single hit)	[6]	High-affinity glucose transporter of the major facilitator superfamily, expression is induced by low levels of glucose and repressed by high levels of glucose
Carbon uptake and utilization	YKL217W	JEN1	ALF	N/A	Non-essential	Weak (single hit)	[6]	Lactate transporter, required for uptake of lactate and pyruvate; phosphorylated; expression is derepressed by transcriptional activator Cat8p during respiratory growth, and repressed in the presence of glucose, fructose, and mannose
Carbon uptake and utilization	YDR050C	TPI1	GCR* ( <4 fold, < 1.41 E-09)	DAmP	Essential	Strong (single hit)	This study	Triose phosphate isomerase, abundant glycolytic enzyme; mRNA half-life is regulated by iron availability; transcription is controlled by activators Reb1p, Gcr1p, and Rap1p through binding sites in the 5' non-coding region
Carbon uptake and utilization	YJR009C	TDH2	BiM	N/A	Non-essential	Not Determined	[8]	Glyceraldehyde-3-phosphate dehydrogenase, isozyme 2, involved in glycolysis and gluconeogenesis; tetramer that catalyzes the reaction of glyceraldehyde-3-phosphate to 1,3 bis-phosphoglycerate; detected in the cytoplasm and cell-wall
Carbon uptake and utilization	YAL038W	CDC19	CTF (overexpression)	N/A	Essential	Not Determined	[9]	Pyruvate kinase, functions as a homotetramer in glycolysis to convert phosphoenolpyruvate to pyruvate, the input for aerobic (TCA cycle) or anaerobic (glucose fermentation) respiration
Carbon uptake and utilization	YKR097W	PCK1	ALF	N/A	Non-essential	Weak (single hit)	[6]	Phosphoenolpyruvate carboxykinase, key enzyme in gluconeogenesis, catalyzes early reaction in carbohydrate biosynthesis, glucose represses transcription and accelerates mRNA degradation, regulated by Mcm1p and Cat8p, located in the cytosol
Pyrimidine Synthesis	YKL024C	URA6	GCR	ura6-4	Essential	Not Determined	This study	Uridylate kinase, catalyzes the seventh enzymatic step in the de novo biosynthesis of pyrimidines, converting uridine monophosphate (UMP) into uridine-5'-diphosphate (UDP)
IMP biosynthesis	YAR015W	ADE1	ALF	N/A	Non-essential	Strong (single hit)	[6]	N-succinyl-5-aminoimidazole-4-carboxamide ribotide (SAICAR) synthetase, required for 'de novo' purine nucleotide biosynthesis; red pigment accumulates in mutant cells deprived of adenine
IMP biosynthesis	YMR120C	ADE17	ALF	N/A	Non-essential	Weak (single hit)	[6]	Enzyme of 'de novo' purine biosynthesis containing both 5-aminoimidazole-4-carboxamide ribonucleotide transformylase and inosine monophosphate cyclohydrolase activities, isozyme of Ade16p; ade16 ade17 mutants require adenine and histidine
IMP biosynthesis	YOR128C	ADE2	ALF	N/A	Non-essential	Weak (single hit)	[6]	Phosphoribosylaminoimidazole carboxylase, catalyzes a step in the 'de novo' purine nucleotide biosynthetic pathway; red pigment accumulates in mutant cells deprived of adenine
IMP biosynthesis	YMR300C	ADE4	ALF	N/A	Non-essential	Weak (single hit)	[6]	Phosphoribosylpyrophosphate amidotransferase (PRPPAT; amidophosphoribosyltransferase), catalyzes first step of the 'de novo' purine nucleotide biosynthetic pathway
IMP biosynthesis	YGL234W	ADE5,7	ALF	N/A	Non-essential	Strong (single hit)	[6]	Bifunctional enzyme of the 'de novo' purine nucleotide biosynthetic pathway, contains aminoimidazole ribotide synthetase and glycinamide ribotide synthetase activities
IMP biosynthesis	YGR061C	ADE6	ALF	N/A	Non-essential	Strong (single hit)	[6]	Formylglycinamidine-ribonucleotide (FGAM)-synthetase, catalyzes a step in the 'de novo' purine nucleotide biosynthetic pathway
IMP biosynthesis	YDR408C	ADE8	ALF	N/A	Non-essential	Weak (single hit)	[6]	Phosphoribosyl-glycinamide transformylase, catalyzes a step in the 'de novo' purine nucleotide biosynthetic pathway
IMP biosynthesis	YDR226W	ADK1	ALF, LOH	N/A	Non-essential	Weak (multiple hit)	[2,6]	Adenylate kinase, required for purine metabolism; localized to the cytoplasm and the mitochondria; lacks cleavable signal sequence
Protein Folding	YJR032W	CPR7	ALF	N/A	Non-essential	Weak (single hit)	[6]	Peptidyl-prolyl cis-trans isomerase (cyclophilin), catalyzes the cis-trans isomerization of peptide bonds N-terminal to proline residues; binds to Hsp82p and contributes to chaperone activity
Protein Folding	YIR004W	DJP1	ALF	N/A	Non-essential	Strong (single hit)	[6]	Cytosolic J-domain-containing protein, required for peroxisomal protein import and involved in peroxisome assembly, homologous to E. coli DnaJ
Protein Folding	YPL037C	EGD1	CTF (overexpression)	N/A	Non-essential	Not Determined	[9]	Subunit beta1 of the nascent polypeptide-associated complex (NAC) involved in protein targeting, associated with cytoplasmic ribosomes; enhances DNA binding of the Gal4p activator; homolog of human BTF3b
Protein Folding	YDR171W	HSP42	ALF	N/A	Non-essential	Weak (single hit)	[6]	Small heat shock protein (sHSP) with chaperone activity; forms barrel-shaped oligomers that suppress unfolded protein aggregation; involved in cytoskeleton reorganization after heat shock
Protein Folding	YHR064C	SSZ1	CTF, BiM, ALF	N/A	Non-essential	Weak (multiple hit)	[6]	Hsp70 protein that interacts with Zuo1p (a DnaJ homolog) to form a ribosome-associated complex that binds the ribosome via the Zuo1p subunit; also involved in pleiotropic drug resistance via sequential activation of PDR1 and PDR5; binds ATP
Protein Folding	YGR285C	ZUO1	BiM	N/A	Non-essential	Strong (single hit)	[6]	Cytosolic ribosome-associated chaperone that acts, together with Ssz1p and the Ssb proteins, as a chaperone for nascent polypeptide chains; contains a DnaJ domain and functions as a J-protein partner for Ssb1p and Ssb2p
Protein Folding	YPL106C	SSE1	BiM	N/A	Non-essential	Not Determined	[8]	ATPase that is a component of the heat shock protein Hsp90 chaperone complex; binds unfolded proteins; member of the heat shock protein 70 (HSP70) family; localized to the cytoplasm
Unknown Function
	YGL168W	HUR1	LOH	N/A	Non-essential	Strong (single hit)	[2]	Protein of unknown function; reported null mutant phenotype of hydroxyurea sensitivity may be due to effects on overlapping PMR1 gene
	YLL049W	LDB18	ALF	N/A	Non-essential	Weak (single hit)	[6]	Protein of unknown function; required for nuclear migration; null mutant shows a reduced affinity for the alcian blue dye suggesting a decreased net negative charge of the cell surface
	YJL038C	LOH1	LOH	N/A	Non-essential	Strong (single hit)	[2]	Protein of unknown function with proposed role in maintenance of genome integrity; deletion mutant displays elevated rates of LOH; induced during sporulation; repressed during vegetative growth by Sum1p and Hst1p; sequence similar to IRC1
	YOL070C	NBA1	CTF	N/A	Non-essential	Strong (single hit)	[6]	Protein of unknown function, localizes to the bud neck and cytoplasm; interacts with Nap1p; may interact with ribosomes, based on co-purification experiments; potential Cdc28p substrate
	YCR095C	OCA4	ALF	N/A	Non-essential	Weak (single hit)	[6]	Cytoplasmic protein required for replication of Brome mosaic virus in S. cerevisiae, which is a model system for studying replication of positive-strand RNA viruses in their natural hosts
	YDL204W	RTN2	ALF	N/A	Non-essential	Strong (single hit)	[6]	Protein of unknown function; has similarity to mammalian reticulon proteins; member of the RTNLA (reticulon-like A) subfamily
	YPL027W	SMA1	ALF	N/A	Non-essential	Weak (single hit)	[6]	Protein of unknown function involved in the assembly of the prospore membrane during sporulation; interacts with Spo14p
	YMR095C	SNO1	CTF, BiM, ALF	N/A	Non-essential	Strong (multiple hit)	[6]	Protein of unconfirmed function, involved in pyridoxine metabolism; expression is induced during stationary phase; forms a putative glutamine amidotransferase complex with Snz1p, with Sno1p serving as the glutaminase
	YLL005C	SPO75	ALF	N/A	Non-essential	Weak (single hit)	[6]	Meiosis-specific protein of unknown function, required for spore wall formation during sporulation; dispensable for both nuclear divisions during meiosis
	YKR091W	SRL3	ALF	N/A	Non-essential	Weak (single hit)	[6]	Cytoplasmic protein that, when overexpressed, suppresses the lethality of a rad53 null mutation; potential Cdc28p substrate
	YIL137C	TMA108	ALF	N/A	Non-essential	Weak (single hit)	[6]	Protein that associates with ribosomes; putative metalloprotease
	YLL028W	TPO1	CTF	N/A	Non-essential	Strong (single hit)	[6]	Polyamine transporter that recognizes spermine, putrescine, and spermidine; catalyzes uptake of polyamines at alkaline pH and excretion at acidic pH; phosphorylation enhances activity and sorting to the plasma membrane
	YNR068C	YNR068C	ALF	N/A	Non-essential	Strong (single hit)	[6]	Putative protein of unknown function
	YNL086W	YNL086W	ALF	N/A	Non-essential	Weak (single hit)	[6]	Putative protein of unknown function; green fluorescent protein (GFP)-fusion protein localizes to endosomes
	YMR185W	YMR185W	GCR* (65, 2.26E-08)	DAmP	Essential	Weak (single hit)	This study	Putative protein of unknown function; conflicting evidence on whether null mutant is viable with elongated buds, or inviable
	YMR134W	YMR134W	GCR	DAmP	Essential	Weak (single hit)	This study	Protein of unknown function that may be involved in iron metabolism; mutant bm-8 has a growth defect on iron-limited medium that is complemented by overexpression of Yfh1p; shows localization to the ER; highly conserved in ascomycetes
	YJR154W	YJR154W	ALF	N/A	Non-essential	Weak (single hit)	[6]	Putative protein of unknown function; green fluorescent protein (GFP)-fusion protein localizes to the cytoplasm
	YJR008W	YJR008W	CTF	N/A	Non-essential	Weak (single hit)	[6]	Putative protein of unknown function; expression repressed by inosine and choline in an Opi1p-dependent manner; expression induced by mild heat-stress on a non-fermentable carbon source.
	YGR153W	YGR153W	ALF	N/A	Non-essential	Weak (single hit)	[6]	Putative protein of unknown function
	YGR071C	YGR071C	ALF	N/A	Non-essential	Weak (single hit)	[6]	Putative protein of unknown function; deletion mutant has increased glycogen accumulation and displays elongated buds; green fluorescent protein (GFP)-fusion protein localizes to the nucleus
	YGL235W	YGL235W	GCR	N/A	Non-essential	Weak (single hit)	[4]	Putative protein of unknown function; potential Cdc28p substrate; null mutant displays increased resistance to antifungal agents gliotoxin, cycloheximide and H2O2
	YGL117W	YGL117W	ALF	N/A	Non-essential	Weak (single hit)	[6]	Putative protein of unknown function
	YER156C	YER156C	ALF	N/A	Non-essential	Weak (single hit)	[6]	Putative protein of unknown function; interacts with Hsp82p and copurifies with Ipl1p; expression is copper responsive and downregulated in strains deleted for MAC1, a copper-responsive transcription factor; similarity to mammalian MYG1
	YDR286C	YDR286C	GCR	N/A	Non-essential	Weak (single hit)	[4]	Putative protein of unknown function; predicted to have thiol-disulfide oxidoreductase active site
	YDL156W	YDL156W	BiM, ALF	N/A	Non-essential	Weak (multiple hit)	[6]	Putative protein of unknown function; protein sequence contains three WD domains (WD-40 repeat); green fluorescent protein (GFP)-fusion protein localizes to the cytoplasm and nucleus
	YDL025C	YDL025C	ALF	N/A	Non-essential	Weak (single hit)	[6]	Putative protein kinase, potentially phosphorylated by Cdc28p; YDL025C is not an essential gene
	YLR312C	YLR312C	BiM	N/A	Non-essential	Not Determined	[8]	Putative protein of unknown function
	YOL014W	YOL014W	BiM	N/A	Non-essential	Not Determined	[8]	Putative protein of unknown function
	YLR287C	YLR287C	BiM	N/A	Non-essential	Not Determined	[8]	Putative protein of unknown function; green fluorescent protein (GFP)-fusion protein localizes to the cytoplasm; YLR287C is not an essential gene
	YMR266W	RSN1	BiM	N/A	Non-essential	Not Determined	[8]	Membrane protein of unknown function; overexpression suppresses NaCl sensitivity of sro7 mutant cells by restoring sodium pump (Ena1p) localization to the plasma membrane
	YOR262W	YOR262W	CTF, ALF	yor262w-ts	Essential	Strong (multiple hit)	[1] and this study	Protein of unknown function required for establishment of sister chromatid cohesion; contains an ATP/GTP binding site motif; similar to YLR243W and is highly conserved across species and homologous to human gene GPN2/ATPBD1B
	YHR122W	YHR122W	CTF, BiM, ALF	yhr122w-ts	Essential	Strong (multiple hit)	[1]	Protein of unknown function required for establishment of sister chromatid cohesion; synthetically lethal with RFC5, an RF-C subunit that links replication to cohesion establishment; YHR122W is an essential gene
Dubious ORFs (not included in subsequent analysis)
	YLR255C	YLR255C	ALF	N/A	Non-essential	Weak (single hit)	[6]	Dubious ORF unlikely to encode a functional protein, based on available experimental and comparative sequence data
	YPR044C	OPI11	GCR	N/A	Non-essential	Weak (single hit)	[4]	Dubious open reading frame unlikely to encode a protein, based on available experimental and comparative sequence data; partially overlaps verified gene RPL43A/YPR043W; deletion confers sensitivity to GSAO
	YOR300W	YOR300W	CTF,ALF	N/A	Non-essential	Strong (multiple hit)	[6]	Dubious open reading frame, unlikely to encode a protein; overlaps with verified gene BUD7/YOR299W; mutation affects bipolar budding and bud site selection, though phenotype could be due to the mutation's effects on BUD7
	YOR024W	YOR024W	BiM, ALF	N/A	Non-essential	Strong (multiple hit)	[6]	Dubious open reading frame unlikely to encode a protein, based on available experimental and comparative sequence data
	YOR015W	YOR015W	GCR	N/A	Non-essential	Weak (single hit)	[4]	Dubious open reading frame unlikely to encode a functional protein, based on available experimental and comparative sequence data
	YNR042W	YNR042W	ALF	N/A	Non-essential	Weak (single hit)	[6]	Dubious open reading frame unlikely to encode a protein, based on available experimental and comparative sequence data; completely overlaps verified gene COQ2
	YNL140C	YNL140C	CTFx2,ALF	N/A	Non-essential	Strong (multiple hit)	[6,11]	Dubious open reading frame unlikely to encode a protein, based on available experimental and comparative sequence data; partially overlaps the verified gene RLR1/YNL139C
	YNL089C	YNL089C	ALF	N/A	Non-essential	Weak (single hit)	[6]	Dubious open reading frame unlikely to encode a functional protein; almost completely overlaps YNL090W/RHO2 which encodes a small GTPase of the Rho/Rac subfamily of Ras-like proteins
	YML009W-B	YML009W-B	CTF,ALF	N/A	Non-essential	Weak (single hit)	[6]	Dubious ORF unlikely to encode a functional protein, based on available experimental and comparative sequence data; deletion mutation confers an increase in Ty1 transposition
	YML009C-A	YML009C-A	CTF,ALF	N/A	Non-essential	Weak (single hit)	[6]	Dubious open reading frame unlikely to encode a functional protein, based on available experimental and comparative sequence data
	YLR374C	YLR374C	BiM, ALF	N/A	Non-essential	Strong (multiple hit)	[6]	Dubious open reading frame unlikely to encode a protein, based on available experimental and comparative sequence data; partially overlaps the uncharacterized ORF STP3/YLR375W
	YLR235C	YLR235C	CTFx2, BiM, ALF	N/A	Non-essential	Strong (multiple hit)	[6.11]	Dubious open reading frame unlikely to encode a protein, based on available experimental and comparative sequence data; partially overlaps the verified gene TOP3
	YKL053W	YKL053W	CTF, BiM	N/A	Non-essential	Weak (multiple hit)	[6]	Dubious open reading frame unlikely to encode a protein, based on available experimental and comparative sequence data; partially overlaps verified ORF ASK1
	YJL075C	APQ13	ALF, BiM	N/A	Non-essential	Weak (multiple hit)	[6,8]	Dubious open reading frame, unlikely to encode a protein; not conserved in closely related Saccharomyces species; 85% of ORF overlaps the verified gene NET1; null mutant is sensitive to sorbate
	YJL007C	YJL007C	BiM, ALF	N/A	Non-essential	Strong (multiple hit)	[6]	Dubious open reading frame unlikely to encode a functional protein, based on available experimental and comparative sequence data
	YHR093W	AHT1	ALF	N/A	Non-essential	Weak (single hit)	[6]	Dubious open reading frame, unlikely to encode a protein; not conserved in closely related Saccharomyces species; multicopy suppressor of glucose transport defects, likely due to the presence of an HXT4 regulatory element in the region
	YGR219W	YGR219W	ALF	N/A	Non-essential	Weak (single hit)	[6]	Dubious open reading frame unlikely to encode a protein, based on available experimental and comparative sequence data; partially overlaps the verified ORF MRPL9/YGR220C
	YGR064W	YGR064W	CTFx2,ALF	N/A	Non-essential	Weak (multiple hit)	[6.11]	Dubious open reading frame unlikely to encode a protein, based on available experimental and comparative sequence data; partially overlaps the verified ORF SPT4/YGR063C
	YFL013W-A	YFL013W-A	ALF	N/A	Non-essential	Weak (single hit)	[6]	Dubious ORF unlikely to encode a protein, based on available experimental and comparative sequence data; partially overlaps IES1/YFL013C; identified by gene-trapping, microarray expression analysis, and genome-wide homology searching
	YDR431W	YDR431W	CTF	N/A	Non-essential	Weak (single hit)	[6]	Dubious ORF unlikely to encode a functional protein, based on available experimental and comparative sequence data
	YDR417C	YDR417C	ALF	N/A	Non-essential	Weak (single hit)	[6]	Dubious open reading frame unlikely to encode a protein, based on available experimental and comparative sequence data; partially overlaps the verified ORF RPL12B/YDR418W
	YDR290W	YDR290W	CTF,ALF	N/A	Non-essential	Weak (multiple hit)	[6]	Dubious open reading frame unlikely to encode a protein, based on available experimental and comparative sequence data; partially overlaps the verified ORF RTT103
	YDR187C	YDR187C	GCR, CTF	DAmP	Essential	Weak (multiple hit)	This study	Dubious open reading frame unlikely to encode a protein, based on available experimental and comparative sequence data; partially overlaps the verified, essential ORF CCT6/YDR188W
	YDL162C	YDL162C	BiM, ALF, GCR	N/A	Non-essential	Strong (multiple hit)	[4,6]	Dubious open reading frame unlikely to encode a protein, based on available experimental and comparative sequence data; partially overlaps ENT1/YDL161W, a verified gene involved in endocytosis and actin cortical patch assembly
	YDL096C	OPI6	ALF	N/A	Non-essential	Weak (single hit)	[6]	Dubious open reading frame unlikely to encode a protein, based on available experimental and comparative sequence data; partially overlaps verified gene PMT1/YDL095W; YDL096C is not essential
	YBR277C	YBR277C	ALF	N/A	Non-essential	Weak (single hit)	[6]	Dubious open reading frame unlikely to encode a protein, based on available experimental and comparative sequence data; partially overlaps the verified gene YBR278W
	YBR113W	YBR113W	ALF	N/A	Non-essential	Strong (single hit)	[6]	Dubious open reading frame unlikely to encode a protein, based on available experimental and comparative sequence data; partially overlaps the verified gene CYC8
	YBR099C	YBR099C	BiM, ALF	N/A	Non-essential	Strong (multiple hit)	[6]	Dubious open reading frame unlikely to encode a protein, based on available experimental and comparative sequence data; completely overlaps the verified gene MMS4
	YML090W	YML090W	ALF	N/A	Non-essential	Weak (single hit)	[6]	Dubious open reading frame unlikely to encode a protein, based on available experimental and comparative sequence data; partially overlaps the dubious ORF YML089C; exhibits growth defect on a non-fermentable (respiratory) carbon source
	YDR433W	YDR433W	BiM	N/A	Non-essential	Not Determined	[8]	Dubious open reading frame unlikely to encode a functional protein, based on available experimental and comparative sequence data
	YDL151C	BUD30	BiM	N/A	Non-essential	Not Determined	[8]	Dubious open reading frame, unlikely to encode a protein; not conserved in closely related Saccharomyces species; 96% of ORF overlaps the verified gene RPC53; diploid mutant displays a weak budding pattern phenotype in a systematic assay
References For Table S1
1. Ben-Aroya S, Coombes C, Kwok T, O'Donnell KA, Boeke JD, et al. (2008) Toward a comprehensive temperature-sensitive mutant repository of the essential genes of Saccharomyces cerevisiae. Mol Cell 30: 248-258.
2. Andersen MP, Nelson ZW, Hetrick ED, Gottschling DE (2008) A genetic screen for increased loss of heterozygosity in Saccharomyces cerevisiae. Genetics 179: 1179-1195.
3. Ben-Aroya S, Agmon N, Yuen K, Kwok T, McManus K, et al. (2010) Proteasome nuclear activity affects chromosome stability by controlling the turnover of Mms22, a protein important for DNA repair. PLoS Genet 6: e1000852.
4. Kanellis P, Gagliardi M, Banath JP, Szilard RK, Nakada S, et al. (2007) A screen for suppressors of gross chromosomal rearrangements identifies a conserved role for PLP in preventing DNA lesions. PLoS Genet 3: e134.
5. Smith S, Hwang JY, Banerjee S, Majeed A, Gupta A, et al. (2004) Mutator genes for suppression of gross chromosomal rearrangements identified by a genome-wide screening in Saccharomyces cerevisiae. Proc Natl Acad Sci USA 101: 9039-9044.
6. Yuen KW, Warren CD, Chen O, Kwok T, Hieter P, et al. (2007) Systematic genome instability screens in yeast and their potential relevance to cancer. Proc Natl Acad Sci USA 104: 3925-3930.
7. Spencer F, Gerring SL, Connelly C, Hieter P (1990) Mitotic chromosome transmission fidelity mutants in Saccharomyces cerevisiae. Genetics 124: 237-249.
8. Daniel JA, Keyes BE, Ng YP, Freeman CO, Burke DJ (2006) Diverse functions of spindle assembly checkpoint genes in Saccharomyces cerevisiae. Genetics 172: 53-65.
9. Ouspenski II, Elledge SJ, Brinkley BR (1999) New yeast genes important for chromosome integrity and segregation identified by dosage effects on genome stability. Nucleic Acids Res 27: 3001-3008.
10. Friedman H, Snyder M (1994) Mutations in PRG1, a yeast proteasome-related gene, cause defects in nuclear division and are suppressed by deletion of a mitotic cyclin gene. Proc Natl Acad Sci USA 91: 2031-2035.
11. Measday V, Baetz K, Guzzo J, Yuen K, Kwok T, et al. (2005) Systematic yeast synthetic lethal and synthetic dosage lethal screens identify genes required for chromosome segregation. Proc Natl Acad Sci USA 102: 13956-13961.
12. Nakajima Y, Tyers RG, Wong CC, Yates JR, 3rd, Drubin DG, et al. (2009) Nbl1p: a Borealin/Dasra/CSC-1-like protein essential for Aurora/Ipl1 complex function and integrity in Saccharomyces cerevisiae. Mol Biol Cell 20: 1772-1784.
13. Camahort R, Li B, Florens L, Swanson SK, Washburn MP, et al. (2007) Scm3 is essential to recruit the histone h3 variant cse4 to centromeres and to maintain a functional kinetochore. Mol Cell 26: 853-865.
14. Connelly C, Hieter P (1996) Budding yeast SKP1 encodes an evolutionarily conserved kinetochore protein required for cell cycle progression. Cell 86: 275-285.
15. Woodbury EL, Morgan DO (2007) The role of self-association in Fin1 function on the mitotic spindle. J Biol Chem 282: 32138-32143.
16. Hoyt MA, Stearns T, Botstein D (1990) Chromosome instability mutants of Saccharomyces cerevisiae that are defective in microtubule-mediated processes. Mol Cell Biol 10: 223-234.
17. Huang B, Huffaker TC (2006) Dynamic microtubules are essential for efficient chromosome capture and biorientation in S. cerevisiae. J Cell Biol 175: 17-23.
18. Pathak R, Blank HM, Guo J, Ellis S, Polymenis M (2007) The Dcr2p phosphatase destabilizes Sic1p in Saccharomyces cerevisiae. Biochem Biophys Res Commun 361: 700-704.
19. Yamamoto A, Guacci V, Koshland D (1996) Pds1p is required for faithful execution of anaphase in the yeast, Saccharomyces cerevisiae. J Cell Biol 133: 85-97.
20. Maine GT, Sinha P, Tye BK (1984) Mutants of S. cerevisiae defective in the maintenance of minichromosomes. Genetics 106: 365-385.
21. Hennessy KM, Lee A, Chen E, Botstein D (1991) A group of interacting yeast DNA replication genes. Genes Dev 5: 958-969.
22. Myung K, Datta A, Kolodner RD (2001) Suppression of spontaneous chromosomal rearrangements by S phase checkpoint functions in Saccharomyces cerevisiae. Cell 104: 397-408.
23. Cha RS, Kleckner N (2002) ATR homolog Mec1 promotes fork progression, thus averting breaks in replication slow zones. Science 297: 602-606.
24. Gunjan A, Verreault A (2003) A Rad53 kinase-dependent surveillance mechanism that regulates histone protein levels in S. cerevisiae. Cell 115: 537-549.
25. Torres-Rosell J, Sunjevaric I, De Piccoli G, Sacher M, Eckert-Boulet N, et al. (2007) The Smc5-Smc6 complex and SUMO modification of Rad52 regulates recombinational repair at the ribosomal gene locus. Nat Cell Biol 9: 923-931.
26. Krogan NJ, Baetz K, Keogh MC, Datta N, Sawa C, et al. (2004) Regulation of chromosome stability by the histone H2A variant Htz1, the Swr1 chromatin remodeling complex, and the histone acetyltransferase NuA4. Proc Natl Acad Sci USA 101: 13513-13518.
27. Xiao Z, McGrew JT, Schroeder AJ, Fitzgerald-Hayes M (1993) CSE1 and CSE2, two new genes required for accurate mitotic chromosome segregation in Saccharomyces cerevisiae. Mol Cell Biol 13: 4691-4702.
28. Kerscher O, Hieter P, Winey M, Basrai MA (2001) Novel role for a Saccharomyces cerevisiae nucleoporin, Nup170p, in chromosome segregation. Genetics 157: 1543-1553.
29. Payne WE, Fitzgerald-Hayes M (1993) A mutation in PLC1, a candidate phosphoinositide-specific phospholipase C gene from Saccharomyces cerevisiae, causes aberrant mitotic chromosome segregation. Mol Cell Biol 13: 4351-4364.
30. Lottersberger F, Rubert F, Baldo V, Lucchini G, Longhese MP (2003) Functions of Saccharomyces cerevisiae 14-3-3 proteins in response to DNA damage and to DNA replication stress. Genetics 165: 1717-1732.
